# Supplementary material for: Associations of delirium with urinary tract infections and asymptomatic bacteriuria in adults aged 65 and older: A systematic review and meta‐analysis
Source: PubMed Central journal article supplement — J Am Geriatr Soc. 2021 Aug 27;69(11):3312–23. doi: 10.1111/jgs.17418 (PMC9292354; doi:10.1111/jgs.17418), 2021-08-27

## SUPPLEMENTAL INFORMATION

|                                                                                                                                                                                  |           |
|----------------------------------------------------------------------------------------------------------------------------------------------------------------------------------|-----------|
| <b>Supplementary Texts</b> .....                                                                                                                                                 | <b>2</b>  |
| Supplementary Text S1: Details on the methods of the study .....                                                                                                                 | 2         |
| Search syntax and results for each electronic database .....                                                                                                                     | 2         |
| Other search sources .....                                                                                                                                                       | 5         |
| Identification of studies .....                                                                                                                                                  | 6         |
| Selection of studies .....                                                                                                                                                       | 6         |
| Methods for addressing articles published in languages other than English .....                                                                                                  | 6         |
| Data extraction .....                                                                                                                                                            | 7         |
| Assessment of study quality and bias .....                                                                                                                                       | 7         |
| Procedure for deciding on the eligibility of studies for each synthesis .....                                                                                                    | 7         |
| Handling of missing data, complex issues of data preparation for synthesis and data conversion .....                                                                             | 8         |
| Tabular and visual display of the results of individual studies and syntheses .....                                                                                              | 8         |
| Data availability .....                                                                                                                                                          | 9         |
| Amendments to information provided in the protocol .....                                                                                                                         | 9         |
| Supplementary Text S2: Items of the Newcastle-Ottawa Quality Assessment Scale .....                                                                                              | 10        |
| <b>Supplementary Tables</b> .....                                                                                                                                                | <b>13</b> |
| Supplementary Table S1: Characteristics of included studies reporting an association between delirium and urinary tract infection in adults aged 65 years and over .....         | 13        |
| Supplementary Table S2: Characteristics of the only included study reporting an association between delirium and asymptomatic bacteriuria in adults aged 65 years and over ..... | 20        |
| Supplementary Table S3: The list of articles excluded at the full text screening phase with indication of reasons for exclusion .....                                            | 21        |
| Supplementary Table S4: Quality assessment of included studies according to the Newcastle-Ottawa Scale .....                                                                     | 55        |
| Supplementary Table S5: Complete list of all moderators of the meta-regression analysis .....                                                                                    | 56        |
| Supplementary Table S6: List of data from each included study used for meta-regression .....                                                                                     | 57        |
| Supplementary Tables S7 – S12: Results of a meta-regression with categorical moderators .....                                                                                    | 71        |
| Supplementary Table S7: Results of a meta-regression with the country of study as a categorical moderator .....                                                                  | 71        |
| Supplementary Table S8: Results of a meta-regression with the type of the study as a categorical moderator .....                                                                 | 71        |
| Supplementary Table S9: Results of a meta-regression with the study temporality as a categorical moderator .....                                                                 | 72        |
| Supplementary Table S10: Results of a meta-regression with the study setting as a categorical moderator .....                                                                    | 72        |
| Supplementary Table S11: Results of a meta-regression with the method to establish the diagnosis of delirium as a categorical moderator .....                                    | 72        |
| Supplementary Table S12: Results of a meta-regression with the method to establish the diagnosis of UTI as a categorical moderator .....                                         | 73        |
| Supplementary Table S13: Results of a meta-regression with numerical moderators .....                                                                                            | 74        |
| <b>Supplementary Figures</b> .....                                                                                                                                               | <b>75</b> |
| Supplementary Figure S1: Funnel plot: all studies .....                                                                                                                          | 75        |
| Supplementary Figure S2: Forest plot: After removing the study with the highest weight .....                                                                                     | 76        |
| Supplementary Figure S3: Funnel plot: After removing the study with the highest weight .....                                                                                     | 77        |
| Supplementary Figure S4: Forest plot: After removing one clear outlier .....                                                                                                     | 78        |
| Supplementary Figure S5: Funnel plot: After removing one clear outlier .....                                                                                                     | 79        |
| Supplementary Figure S6: Forest plot: Studies comparing participants with delirium to controls without delirium .....                                                            | 80        |
| Supplementary Figure S7: Funnel plot: Studies comparing participants with delirium to controls without delirium .....                                                            | 81        |
| Supplementary Figure S8: Forest plot: Studies comparing participants with UTI to non-UTI controls .....                                                                          | 82        |
| Supplementary Figure S9: Funnel plot: Studies comparing participants with UTI to non-UTI controls .....                                                                          | 83        |
| Supplementary Figure S10: Forest plot: Studies with a diagnosis of delirium based on DSM or ICD criteria .....                                                                   | 84        |
| Supplementary Figure S11: Funnel plot: Studies with a diagnosis of delirium based on DSM or ICD criteria .....                                                                   | 85        |
| Supplementary Figure S12: Forest plot: Studies with a diagnosis of UTI based on microbiological urine tests .....                                                                | 86        |
| Supplementary Figure S13: Forest plot: Studies conducted in the clinical setting .....                                                                                           | 87        |
| Supplementary Figure S14: Funnel plot: Studies conducted in the clinical setting .....                                                                                           | 88        |
| Supplementary Figure S15: Forest plot: Studies conducted in nursing homes .....                                                                                                  | 89        |
| Supplementary Figure S16: Funnel plot: Studies conducted in nursing homes .....                                                                                                  | 90        |
| Supplementary Figure S17: Forest plot: Studies of population-based samples .....                                                                                                 | 91        |

## Supplementary Texts

### Supplementary Text S1 Details on the methods of the study

#### Search syntax and results for each electronic database

##### PubMed

(delir\* OR confusio\* OR "Delirium"[Mesh] OR "Confusion"[Mesh]) AND ("bacteriuria"[Mesh] OR bacteriur\* OR bacillur\* OR pyur\* OR ("asymptomatic infections"[Mesh] OR asymptom\* OR nonsymptom\* OR non symptomatic OR (without OR no OR absen\*)) AND (bacteriur\* OR bacillur\* OR pyur\* OR bacteria OR infectio\*)) OR "urinary tract infections"[Mesh] OR (("urinary tract"[Mesh] OR (urinary AND tract) OR urinary OR genito-urinar\* OR genitourinar\* OR urogenital\* OR bladder OR kidney) AND ("Infections"[Mesh] OR infectio\*)) OR UTI OR "utis" OR "dysuria"[Mesh] OR dysuri\* OR cystitis[Mesh] OR cystiti\* OR "pyelocystitis"[Mesh] OR pyelocystiti\* OR pyelo-cystiti\* OR cystopyelit\* OR "pyelonephritis"[Mesh] OR pyelonephrit\* OR pyelo-nephrit\*)

*No limitations were placed in terms of language, date, type and status of publications*

**Search results for 5 January 2021:** 1096 items

##### Ovid Databases (Ovid MEDLINE(R) ALL, Embase, PsycINFO)

1. exp delirium/ or exp confusion/
2. (delir\* or confusio\*).af.
3. exp bacteriuria/ or exp pyuria/ or exp urinary tract infection/ or exp dysuria/ or exp cystitis/ or exp pyelocystitis/ or exp pyelonephritis/
4. (bacteriur\* or bacillur\* or pyur\* or leukocytur\* or dysur\* or cystit\* or pyelocystit\* or pyelo-cystit\* or cystopyelit\* or pyelonephrit\* or pyelo-nephrit\*).af.
5. (uti or "utis").af.
6. exp asymptomatic infections/
7. exp urinary tract/
8. (urinary or genito-urinar\* or genitourinar\* or urogenital\* or bladder or kidney).af.
9. (asymptom\* or nonsymptom\* or non symptomatic).af.
10. exp infection/
11. infectio\*.af.
12. 10 or 11
13. 1 or 2
14. 7 or 8 or 9
15. 12 and 14
16. 3 or 4 or 5 or 6 or 15
17. 13 and 16

*No limitations were placed in terms of language, date, type and status of publications*

**Search results for 5 January 2021:** 8243 items

## CINAHL

1. (MH "Delirium") OR (MH "ICU Psychosis") OR (MH "Confusion+")
2. delir\* OR confusio\*
3. (MH "Bacteriuria") OR (MH "Pyuria") OR (MH "Urinary Tract Infections+") OR (MH "Dysuria") OR (MH "Cystitis+") OR (MH "Pyelonephritis")
4. bacteriur\* OR bacillur\* OR pyur\* OR leukocytur\* OR uti OR "utis" OR dysur\* OR cystit\* OR pyelocystit\* OR pyelo-cystit\* OR cystopyelit\* OR pyelonephrit\* OR pyelo-nephrit\*
5. (MH "Urinary Tract+") OR urinary OR genito-urinar\* OR genitourinar\* OR urogenital\* OR bladder OR kidney
6. asymptom\* OR nonsymptom\* OR non symptomatic
7. (MH "Infection+") OR infectio\*
8. S1 OR S2
9. S5 OR S6
10. S7 AND S9
11. S3 OR S4 OR S10
12. S8 AND S11

*No limitations were placed in terms of language, date, type and status of publications*

**Search results for 5 January 2021:** 344 items

## Cochrane Library

- #1 MeSH descriptor: [Delirium] explode all trees
- #2 MeSH descriptor: [Confusion] explode all trees
- #3 delir\* OR confusio\*
- #4 #1 OR #2 OR #3
- #5 MeSH descriptor: [Bacteriuria] explode all trees
- #6 MeSH descriptor: [Pyuria] explode all trees
- #7 MeSH descriptor: [Urinary Tract Infections] explode all trees
- #8 MeSH descriptor: [Dysuria] explode all trees
- #9 MeSH descriptor: [Cystitis] explode all trees
- #10 MeSH descriptor: [Pyelocystitis] explode all trees
- #11 MeSH descriptor: [Pyelonephritis] explode all trees
- #12 MeSH descriptor: [Asymptomatic Infections] explode all trees
- #13 bacteriur\* OR bacillur\* OR pyur\* OR leukocytur\* OR uti OR "utis" OR dysur\* OR cystit\* OR pyelocystit\* OR pyelo-cystit\* OR cystopyelit\* OR pyelonephrit\* OR pyelo-nephrit\*
- #14 MeSH descriptor: [Urinary Tract] explode all trees
- #15 urinary OR genito-urinar\* OR genitourinar\* OR urogenital\* OR bladder OR kidney
- #16 asymptom\* OR nonsymptom\* OR non symptomatic
- #17 MeSH descriptor: [Infection] explode all trees
- #18 infectio\*
- #19 #14 OR #15 OR #16
- #20 #17 OR #18
- #21 #19 AND #20
- #22 #5 OR #6 OR #7 OR #8 OR #9 OR #10 OR #11 OR #12 OR #13 OR #21
- #23 #4 AND #22

*No limitations were placed in terms of language, date, type and status of publications*

**Search results for 5 January 2021:** 673 items

**Web of Science (Web of Science Core Collection [Science Citation Index Expanded, Social Sciences Citation Index, Arts & Humanities Citation Index, Conference Proceedings Citation Index- Science, Conference Proceedings Citation Index- Social Science & Humanities, Emerging Sources Citation Index], KCI-Korean Journal Database, MEDLINE®, Russian Science Citation Index, SciELO Citation Index)**

- 1 TOPIC: (delir\* OR confusio\*)
- 2 TOPIC: (bacteriur\* OR bacillur\* OR pyur\* OR leukocytur\* OR uti OR "utis" OR dysur\* OR cystit\* OR pyelocystit\* OR pyelo-cystit\* OR cystopyelit\* OR pyelonephrit\* OR pyelo-nephrit\*)
- 3 TOPIC: (urinary OR genito-urinar\* OR genitourinar\* OR urogenital\* OR bladder OR kidney)
- 4 TOPIC: (asymptom\* OR nonsymptom\* OR non symptomatic)
- 5 TOPIC: (infectio\*)
- 6 #4 OR #3
- 7 #6 AND #5
- 8 #7 OR #2
- 9 #8 AND #1

*No limitations were placed in terms of language, date, type and status of publications*

**Search results for 5 January 2021:** 1541 items

### **Scopus**

TITLE-ABS-KEY((delir\* OR confusio\*) AND (bacteriur\* OR bacillur\* OR pyur\* OR leukocytur\* OR uti OR "utis" OR dysur\* OR cystit\* OR pyelocystit\* OR pyelo-cystit\* OR cystopyelit\* OR pyelonephrit\* OR pyelo-nephrit\* OR ((urinary OR genito-urinar\* OR genitourinar\* OR urogenital\* OR bladder OR kidney) AND infectio\*)))

*No limitations were placed in terms of language, date, type and status of publications*

**Search results for 5 January 2021:** 4365 items

### **The Networked Digital Library of Theses and Dissertations (NDLTD)**

(delir\* OR confusio\*) AND (bacteriur\* OR bacillur\* OR pyur\* OR leukocytur\* OR uti OR "utis" OR dysur\* OR cystit\* OR pyelocystit\* OR pyelo-cystit\* OR cystopyelit\* OR pyelonephrit\* OR pyelo-nephrit\* OR ((urinary OR genito-urinar\* OR genitourinar\* OR urogenital\* OR bladder OR kidney) AND infectio\*))

*No limitations were placed in terms of language, date, type and status of publications*

**Search results for 5 January 2021:** 33 items

### **ProQuest Dissertations & Theses Global (via ProQuest)**

noft((delir\* OR confusio\*) AND (bacteriur\* OR bacillur\* OR pyur\* OR leukocytur\* OR uti OR "utis" OR dysur\* OR cystiti\* OR pyelocystit\* OR pyelo-cystit\* OR cystopyelit\* OR pyelonephrit\* OR pyelo-nephrit\* OR ((urinary OR genito-urinar\* OR genitourinar\* OR urogenital\* OR bladder OR kidney) AND infectio\*)))

*No limitations were placed in terms of language, date, type and status of publications*

**Search results for 5 January 2021:** 11 items

### Other search sources

Additional manual searches were conducted by two researchers (DK and RK) between February and June 2020 in the following **journals**:

*American Journal of Geriatric Psychiatry, International Journal of Geriatric Psychiatry, Aging and Mental Health, Journal of Geriatric Psychiatry and Neurology, International Psychogeriatrics, Neuropsychiatric Disease and Treatment, Clinical Gerontologist, Psychogeriatrics, Nature Reviews Microbiology, Clinical Microbiology Reviews, The Lancet Infectious Diseases, FEMS Microbiology Reviews, Clinical Infectious Diseases, European Urology, Journal of Urology, Urology, Journal of the American Geriatrics Society, Age and Ageing*

**Search results:** no suitable articles were found that were not included in the final library of studies found through the database search.

Additional manual searches were conducted by two researchers (DK and RK) between May and June 2020 in the following **conference proceedings**:

*Annual Meeting of American Association for Geriatric Psychiatry, Annual Scientific Meeting of Canadian Academy of Geriatric Psychiatry and Canadian Coalition for Seniors' Mental Health, Annual Congress of the European Association of Urology, Annual Meeting of the American Urological Association, European Congress of Clinical Microbiology and Infectious Diseases (European Society of Clinical Microbiology and Infectious Diseases), International Conference on Healthcare Associated Infections (Society for Healthcare Epidemiology of America), International Congress on Infectious Diseases (International Society for Infectious Diseases), Annual Scientific Meeting of the Gerontological Society of America, Annual Scientific Meeting of the American Geriatrics Society, Congress of the European Geriatric Medicine Society.*

**Search results:** no suitable records were found that were not included in the final library of studies found through the database search.

Between February and July 2020, two researchers (DK and RK) also contacted members of the following **professional associations** by email, asking them to provide any published and/or unpublished data on the associations of delirium with urinary tract infections and asymptomatic bacteriuria in adults aged 65 years and over:

*American Delirium Society, European Delirium Association, Scottish Delirium Association, Australasian Delirium Association, American Association for Geriatric Psychiatry, Canadian Academy of Geriatric Psychiatry and Canadian Coalition for Seniors' Mental Health, International Society for Infectious Diseases, Infectious Diseases Society of America, European Society of Clinical Microbiology and Infectious Diseases, Scottish Urinary Tract Infection Network, Society for Healthcare Epidemiology of America, European Association of Urology, American Urological Association, Gerontological Society of America, American Geriatrics Society, European Geriatric Medicine Society.*

**Search results:** the representatives of the professional associations could not provide us with any suitable information.

If the necessary data were not reported, which precluded the inclusion of a study, we **contacted the corresponding authors of the potentially eligible studies** to ask them for the relevant information.

**Results of requests for missing data:** we contacted the authors of 6 potentially eligible articles asking them to provide the missing data, but the data we requested were only provided by the authors of 3 studies (Alvarez-Perez et al., Amado-Tineo et al. and Gau et al.; reference numbers in the main publication 32, 33, 22 respectively), all of which were included in the review.

## **Identification of studies**

Studies identified by electronic and manual searches were listed with citation, titles and abstracts in EndNote X9 (Clarivate, Philadelphia, PA 2013), duplicates were excluded in two steps: first using the EndNote X9 function "remove duplicates" and then manually. The formed library of studies was then uploaded to Rayyan QCRI (<https://www.rayyan.ai/>), a free web and mobile app that facilitates collaboration between reviewers during the study selection process. Prior to the formal beginning of the screening process, a pilot calibration exercise was conducted in order to test the screening.

## **Selection of studies**

The eligibility process was conducted in four separate stages:

1. Two authors (DK and RK) independently and blindly screened the title and abstracts of all non-duplicated papers and excluded those clearly not pertinent. The final list of 417 articles selected for the next stage of the 8748 articles screened was agreed with the discrepancies resolved by consensus between the two authors. If there was any doubt about inclusion, the article proceeded to the next stage.
2. The full-text versions of the articles that passed the first stage of screening were downloaded.
3. Next, DK and RK independently manually screened the reference lists of 417 potentially eligible studies and 3 previously published reviews (reference numbers in the main publication: 24-26) to identify additional studies that were not included in the final library of studies found through the database search. 8 studies were identified, with screening discrepancies resolved by consensus between the two authors. The full-text versions of these 8 studies were downloaded and added to the library of 417 full-text articles that passed the title and abstract screening.
4. Finally, 425 full-text articles were assessed for eligibility by two authors (DK and RK) independently and blindly. The final list of 29 articles selected of the 425 full-text articles screened was agreed with the discrepancies resolved by consensus between the two authors whereas in the case of 3 articles another author (EL) acted as arbitrator. Data from multiple reports of the same study were linked together. A list of the 399 articles excluded at this stage, with reasons for exclusion, is provided separately (see Supplementary Table S3).

## **Methods for addressing articles published in languages other than English**

One or more authors of this publication are fluent in English, German, French, Polish, Spanish, Russian and Belarusian. It was intended that authors of potentially relevant studies published in languages not spoken by the investigators would be asked, if necessary, to provide details of their study in English or another language spoken by the investigators. However, no such need arose during the work on the present systematic review.

## Data extraction

Two researchers (DK and RK) independently and blindly performed data extraction. Discrepancies that arose regarding about 8% of the extracted data were resolved by consensus between the two authors. In order to ensure consistency among reviewers, a calibration exercise was performed before the data extraction started.

Data was extracted and inserted into an MS Excel sheet. The following data was extracted:

1. Publication detail: year of publication, country where the study was conducted and language of publication;
2. Study design: type of study (cross-sectional, case-control, cohort, other); study temporality (prospective, retrospective); patient enrollment (consecutive, nonconsecutive); study setting (clinical, nursing home, epidemiological population study, mixed study population);
3. Study participants details: number of study participants, minimum age of study participants, mean age (SD) or median age (IQR) in the whole group of study participants and/or in individual study sub-groups, gender distribution (n of male), SES and race/ethnicity of participants in the whole group of study participants and/or in individual study sub-groups; medical and psychiatric co-morbidities of individuals with and without delirium (type and prevalence), method to establish the diagnosis of delirium (accordance to criteria of DSM (any version) or ICD (any version), scales accordance to criteria of DSM (any version) or ICD (any version), both scales and criteria accordance to DSM (any version) or ICD (any version), diagnosis recorded in medical files); medication status of individuals with and without delirium (type of medication and percentage of treated participants), methods used to define urinary tract infection (urine tests and presence of UTI symptoms, diagnosis recorded in medical files) and asymptomatic bacteriuria (microbiological urine tests, on the basis of study-defined criteria, diagnosis recorded in medical files);
4. Outcome measure: number of study participants with delirium, without delirium, with urinary tract infection, without urinary tract infection, with asymptomatic bacteriuria, without asymptomatic bacteriuria, with delirium and with urinary tract infection, without delirium and with urinary tract infection, with delirium and without urinary tract infection, without delirium and without urinary tract infection, with delirium and with asymptomatic bacteriuria, without delirium and with asymptomatic bacteriuria, with delirium and without asymptomatic bacteriuria, without delirium and without asymptomatic bacteriuria; effect size (any type with specification) of the association between delirium and urinary tract infection (with p-value), effect size (any type with specification) of the association between delirium and asymptomatic bacteriuria (with p-value).

## Assessment of study quality and bias

Two authors (DK and RK) independently and blindly assessed the quality and bias of the included studies using the Newcastle-Ottawa scale. For the items included in this scale, see Supplementary Text S2. Discrepancies in the ratings (6% of total items) were resolved by consensus. For the assessment results of each study, see Supplementary Table S4.

## Procedure for deciding on the eligibility of studies for each synthesis

After data extraction was completed, the first author (DK) formed further the following groups of studies on the association between delirium and UTI in older adults for subgroup meta-analyses, guided by the data already extracted: 1) studies in which participants with delirium were compared with non-delirium controls, 2) studies in which participants with UTI were compared with non-UTI controls, 3) studies with a diagnosis of delirium based on DSM or ICD criteria, 4) studies with a diagnosis of UTI based on microbiological urine tests, 5) studies conducted in the clinical setting, 6) studies conducted in nursing homes, 7) studies of population-based samples.

After identifying the study with the highest relative weight (reference number in the main publication: 34) and the study with the largest effect size (reference number in the main publication: 55), two groups of studies were prepared for sensitivity analyses. In the first group, the study with the highest relative weight was removed, while in the second group the study with the largest effect size was eliminated.

### **Handling of missing data, complex issues of data preparation for synthesis and data conversion**

When the associations of delirium with UTI and AB were reported as a percentage of individuals in each of the study subgroups with a known number of participants (e.g. the percentage of participants with UTI in subgroups of participants with and without delirium, the numbers of participants in which were reported by the authors), the two authors (DK and RK) independently and blindly converted these rates to the number of participants, resolving discrepancies by consensus.

In two included RCTs (reference numbers in the main publication: 45, 46) investigating environmental interventions to reduce the incidence of delirium, in which associations between delirium and UTI were also reported, the data were extracted for control groups only, for which the authors reported the number of patients with and without delirium as well as the number of patients with UTI in each subgroup.

For the selection of numerical moderators for the meta-regression analysis, all data reported by the study authors on socioeconomic status, all medical and psychiatric comorbidities and medication use of the study participants were first extracted. These data from all studies were subsequently pooled together to see which items were reported in more than three studies, resulting in a list of numerical moderators from those items.

The data from the whole group of each study were used for meta-regression analyses with numerical moderators. If such data (e.g. the percentage of participants with a particular condition) were reported by the authors for both study subgroups, they were recalculated by the authors for the entire study group. The recalculation was carried out independently and blindly by DK and RK. Accordingly, studies in which these data were reported by the authors only for a subgroup (e.g. the subgroup of delirium participants) were not included in the meta-regression analysis.

In five studies (reference numbers in the main publication: 34, 39, 44, 52, 56), the authors did not report the mean age of the participants, but did report their minimum age which met our inclusion criteria. Data from these studies were included in the meta-analysis, but meta-regression analyses of the effect of age on the association between delirium and UTI in older adults were conducted only for the 24 studies (reference numbers in the main publication: 20-23, 32, 33, 35-38, 40-43, 45-51, 53-55) in which the authors reported the mean age of participants.

### **Tabular and visual display of the results of individual studies and syntheses**

The results of the narrative synthesis were organised in two tables (Supplementary Tables S1 and S2), containing data on the studies addressing the associations between delirium and UTI, and between delirium and AB. The studies in the tables are listed in alphabetical order of the first authors' names. Each of the two tables contains the following data a) the name of the first author and year of publication of each study, b) country of study, c) study design, d) number of participants, e) age of participants (indicating both minimum age of participants and mean or median age of participants reported by authors), f) gender distribution (percentage of male participants), e) study setting, f) method of establishing diagnosis of delirium, g) method of establishing diagnosis of UTI or AB, and h) study results in terms of data on the associations of our interest (number of patients with and without delirium or with or without UTI and number of patients with or without UTI or with and without delirium in each study subgroup, respectively, calculated odds ratio with 95% confidence interval and p-value). The results of the meta-analytical syntheses are presented as forest plots (Figure 2, Supplementary Figures S2, S4, S6, S8, S10, S12, S13, S15 and S17), the data on publication bias are presented as funnel plots (Supplementary Figures S1, S3, S5, S7, S9, S11, S14 and S16).

Since the subgroup meta-analyses of studies in which the diagnosis of UTI was made on the basis of microbiological urine tests and of studies of population-based samples included only two studies each, it was not possible to assess publication bias and construct a funnel plot in these cases.



### **Data availability**

All data extracted from the included studies and used for all analyses are presented in Supplementary Tables 1, 2, 6. A detailed description of the statistical analysis (including the software used) is presented in the "methods" section of the main text. A template data collection form (MS Excel spreadsheet) can be provided by the corresponding author on request.

### **Amendments to information provided in the protocol**

According to our original plan, the study protocol specified that only studies comparing individuals with delirium to those without delirium were to be considered. However, before we started searching the databases, we decided to include also studies comparing individuals with UTI to those without UTI, as well as studies comparing individuals with asymptomatic bacteriuria to those without asymptomatic bacteriuria. The crucial point here was that the odds ratio we chose as a measure of the associations of our interest allowed such an approach, which additionally made it possible to include more studies that addressed the associations we were interested in. Subsequently, we conducted additional subgroup meta-analyses in which we separately considered studies comparing individuals with delirium to those without delirium as well as studies comparing individuals with UTI to those without UTI.

## Supplementary Text S2 Items of the Newcastle-Ottawa Quality Assessment Scale

### CASE CONTROL STUDIES

Note: A study can be awarded a maximum of one star for each numbered item within the Selection and Exposure categories. A maximum of two stars can be given for Comparability.

#### **Selection**

- 1) Is the case definition adequate?
  - a) yes, with independent validation \*
  - b) yes, e.g. record linkage or based on self reports
  - c) no description
- 2) Representativeness of the cases
  - a) consecutive or obviously representative series of cases \*
  - b) potential for selection biases or not stated
- 3) Selection of Controls
  - a) community controls \*
  - b) hospital controls
  - c) no description
- 4) Definition of Controls
  - a) no history of disease (endpoint) \*
  - b) no description of source

#### **Comparability**

- 1) Comparability of cases and controls on the basis of the design or analysis
  - a) study controls for \_\_\_\_\_ (select the most important factor) \*
  - b) study controls for any additional factor \*  
(this criterion could be modified to indicate specific control for a second important factor)

#### **Exposure**

- 1) Ascertainment of exposure
  - a) secure record (e.g. surgical records) \*
  - b) structured interview where blind to case/control status \*
  - c) interview not blinded to case/control status
  - d) written self report or medical record only
  - e) no description
- 2) Same method of ascertainment for cases and controls
  - a) yes \*
  - b) no
- 3) Non-Response rate
  - a) same rate for both groups \*
  - b) non respondents described
  - c) rate different and no designation

## COHORT STUDIES

Note: A study can be awarded a maximum of one star for each numbered item within the Selection and Outcome categories. A maximum of two stars can be given for Comparability

### Selection

- 1) Representativeness of the exposed cohort
  - a) truly representative of the average \_\_\_\_\_ (describe) in the community \*
  - b) somewhat representative of the average \_\_\_\_\_ in the community \*
  - c) selected group of users eg nurses, volunteers
  - d) no description of the derivation of the cohort
- 2) Selection of the non exposed cohort
  - a) drawn from the same community as the exposed cohort \*
  - b) drawn from a different source
  - c) no description of the derivation of the non exposed cohort
- 3) Ascertainment of exposure
  - a) secure record (eg surgical records) \*
  - b) structured interview \*
  - c) written self report
  - d) no description
- 4) Demonstration that outcome of interest was not present at start of study
  - a) yes \*
  - b) no

### Comparability

- 1) Comparability of cohorts on the basis of the design or analysis
  - a) study controls for \_\_\_\_\_ (select the most important factor) \*
  - b) study controls for any additional factor \*  
(this criterion could be modified to indicate specific control for a second important factor)

### Outcome

- 1) Assessment of outcome
  - a) independent blind assessment \*
  - b) record linkage \*
  - c) self report
  - d) no description
- 2) Was follow-up long enough for outcomes to occur
  - a) yes (select an adequate follow up period for outcome of interest) \*
  - b) no
- 3) Adequacy of follow up of cohorts
  - a) complete follow up - all subjects accounted for \*
  - b) subjects lost to follow up unlikely to introduce bias - small number lost - > 95% follow up or description provided of those lost \*
  - c) follow up rate < 95% and no description of those lost
  - d) no statement

## CROSS-SECTIONAL STUDIES

Note: A study can be awarded a maximum of one star for each numbered item within the Selection and Exposure categories. A maximum of two stars can be given for Comparability.

### Selection

- 1) Representativeness of the sample
  - a) truly representative of the average in the target population \*  
(all subjects or random sampling)
  - b) somewhat representative of the average in the target group \*  
(non-random sampling)
  - c) selected group of users
  - d) no description of the derivation of the included subjects
- 2) Sample size
  - a) justified and satisfactory (including sample size calculation) \*
  - b) not justified
- 3) Non-respondents
  - a) comparability between respondents and non-respondents characteristics is established, and the response rate is satisfactory \*
  - b) the response rate is unsatisfactory, or the comparability between respondents and non-respondents is unsatisfactory
  - c) no description of the response rate or the characteristics of the responders and the non-responders
- 4) Ascertainment of the exposure (risk factor)
  - a) validated measurement tool \*
  - b) non-validated measurement tool, but the tool is available or described \*
  - c) no description of the measurement tool

### Comparability

- 1) The subjects in different outcome groups are comparable, based on the study design or analysis. Confounding factors are controlled
  - a) study controls for \_\_\_\_\_ (select the most important factor) \*
  - b) study controls for any additional factor \*  
(this criterion could be modified to indicate specific control for a second important factor)

### Outcome

- 1) Assessment of outcome
  - a) independent blind assessment \*
  - b) record linkage \*
  - c) self report
  - d) no description
- 2) Statistical test
  - a) statistical test used to analyse the data clearly described, appropriate and measures of association presented including confidence intervals and probability level (p value) \*
  - b) statistical test not appropriate, not described or incomplete

## Supplementary Tables

### Supplementary Table S1

#### Characteristics of included studies reporting an association between delirium and urinary tract infection in adults aged 65 years and over

| First author, year <sup>a</sup> , study country | Study design                 | Number of participants, age of participants, % of male of participants                                                                          | Study setting | Diagnosis of delirium               | Diagnosis of UTI                    | Results                                                                                                                                                                                       |
|-------------------------------------------------|------------------------------|-------------------------------------------------------------------------------------------------------------------------------------------------|---------------|-------------------------------------|-------------------------------------|-----------------------------------------------------------------------------------------------------------------------------------------------------------------------------------------------|
| Alvarez-Perez, 2017<br>Portugal                 | Cohort, retrospective        | 805 patients<br>age $\geq 67$ years<br>mean age 73.9 SD 11.8<br>male: 52.4 %                                                                    | clinical      | DSM-5 criteria                      | diagnosis recorded in medical files | 103 patients with delirium (of which 28 with UTI)<br>702 patients without delirium (of which 81 with UTI)<br><br>OR: 2.86; 95% CI: 1.75 - 4.68<br>p-value: < 0.001<br>(0,0000279510440095443) |
| Amado Tineo, 2013<br>Peru                       | Cross-sectional, prospective | 172 patients<br>age $\geq 60$ years<br>mean age 78.5 SD 8.3<br>male: 44.2 %                                                                     | clinical      | Confusion Assessment Method (CAM)   | diagnosis recorded in medical files | 60 patients with delirium (of which 6 with UTI)<br>112 patients without delirium (of which 12 with UTI)<br><br>OR: 0.93; 95% CI: 0.33 - 2.60;<br>p-value: 0.884                               |
| Anderson, 2010<br>USA                           | Cohort, prospective          | 350 residents<br>age $\geq 65$ years<br>mean age 83.6 SD 6.9<br>male: 34.3 %                                                                    | nursing home  | Confusion Assessment Method (CAM)   | diagnosis recorded in medical files | 197 residents with delirium (of which 19 with UTI)<br>153 residents without delirium (of which 14 with UTI)<br><br>OR: 1.06; 95% CI 0.51 - 2.19;<br>p-value: 0.875                            |
| Arshi, 2018<br>USA                              | Cohort, prospective          | 8439 patients<br>age $\geq 65$ years<br>median age in patients with delirium: 86<br>median age in patients without delirium: 84<br>male: 28.5 % | clinical      | diagnosis recorded in medical files | diagnosis recorded in medical files | 2569 patients with delirium (of which 154 with UTI)<br>5870 patients without delirium (of which 252 with UTI)<br><br>OR: 1.42; 95% CI 1.16 - 1.75<br>p-value 0.001                            |

|                                    |                                 |                                                                             |                     |                                            |                                        |                                                                                                                                                                                                 |
|------------------------------------|---------------------------------|-----------------------------------------------------------------------------|---------------------|--------------------------------------------|----------------------------------------|-------------------------------------------------------------------------------------------------------------------------------------------------------------------------------------------------|
| Brouquet, 2010<br>France           | Cohort,<br>prospective          | 118 patients<br>age $\geq$ 75 years<br>mean age 81.3 SD 4.8<br>male: 47.5 % | clinical            | Confusion<br>Assessment<br>Method<br>(CAM) | diagnosis recorded in<br>medical files | 28 patients with delirium<br>(of which 0 with UTI)<br>90 patients without delirium<br>(of which 5 with UTI)<br><br>OR: 0.27; 95% CI: 0.01 - 5.09<br>p-value 0.384                               |
| de Bortoli Pereira, 2018<br>Brazil | Cross-sectional,<br>prospective | 172 patients<br>age $\geq$ 60 years<br>mean age 71.2 SD 7.8<br>male: 64.2 % | clinical            | Confusion<br>Assessment<br>Method<br>(CAM) | diagnosis recorded in<br>medical files | 30 patients with delirium<br>(of which 7 with UTI)<br>142 patients without delirium<br>(of which 12 with UTI)<br><br>OR: 3.30; 95% CI 1.17 - 9.26<br>p-value: 0.023                             |
| Edlund, 2001<br>Sweden             | Cohort,<br>prospective          | 71 patients<br>age $\geq$ 65 years<br>mean age 78.8 SD 8.4<br>male: 21.1 %  | clinical            | DSM-IV<br>criteria                         | diagnosis recorded in<br>medical files | 19 patients with delirium<br>(of which 9 with UTI)<br>52 patients without delirium<br>(of which 13 with UTI)<br><br>OR: 2.70; 95% CI 0.90 - 8.09<br>p-value 0.076                               |
| Edlund, 2006<br>Sweden             | Cohort,<br>prospective          | 400 patients<br>age $\geq$ 70 years<br>mean age 80.2 SD 6.0<br>male: 44.2 % | clinical            | DSM-IV<br>criteria                         | diagnosis recorded in<br>medical files | 125 patients with delirium<br>(of which 9 with UTI)<br>275 patients without delirium<br>(of which 11 with UTI)<br><br>OR: 1.86; 95% CI 0.75 - 4.61<br>p-value 0.179                             |
| Elsamadicy, 2017<br>USA            | Cohort,<br>retrospective        | 453 patients<br>age $\geq$ 65 years<br>mean age 72.5 SD 5.8<br>male: 46.6 % | clinical            | DSM-5<br>criteria                          | diagnosis recorded in<br>medical files | 17 patients with delirium<br>(of which 8 with UTI)<br>436 patients without delirium<br>(of which 51 with UTI)<br><br>OR: 6.71; 95% CI 2.48 - 18.17<br>p-value < 0.001<br>(0,000180048146131595) |
| Eriksson, 2010<br>Sweden           | Cross-sectional,<br>prospective | 395 participants<br>age $\geq$ 85 years<br>male: 0 %                        | epidemiolo<br>gical | DSM-IV<br>criteria                         | diagnosis recorded in<br>medical files | 117 participants with UTI<br>(of which 44 with delirium)<br>278 participants without UTI                                                                                                        |

|                                    |                                 |                                                                         |                                        |                                              |                                                                                                                                                                                                                                                                                                                                                                                                           |                                                                                                                                                                                                              |
|------------------------------------|---------------------------------|-------------------------------------------------------------------------|----------------------------------------|----------------------------------------------|-----------------------------------------------------------------------------------------------------------------------------------------------------------------------------------------------------------------------------------------------------------------------------------------------------------------------------------------------------------------------------------------------------------|--------------------------------------------------------------------------------------------------------------------------------------------------------------------------------------------------------------|
|                                    |                                 |                                                                         | population study                       |                                              |                                                                                                                                                                                                                                                                                                                                                                                                           | (of which 69 with delirium)<br>OR: 1.83; 95% CI 1.15 - 2.90<br>p-value 0.011                                                                                                                                 |
| Eriksson, 2011<br>Sweden           | Cross-sectional,<br>prospective | 504 participants<br>age ≥ 85 years<br>mean age 90.6 SD 4.7<br>male: 0 % | epidemiological<br>population<br>study | DSM-IV<br>criteria                           | diagnosis recorded in<br>medical files                                                                                                                                                                                                                                                                                                                                                                    | 137 participants with delirium<br>(of which 39 with UTI)<br>367 participants without<br>delirium<br>(of which 48 with UTI)<br><br>OR: 2.64; 95% CI 1.64 - 4.27<br>p-value < 0.001<br>(0,0000698627545547836) |
| Gau, 2009<br>USA                   | Case-control,<br>retrospective  | 246 patients<br>age ≥ 65 years<br>mean age 82.4 SD 8.0<br>male: 22.0 %  | clinical                               | diagnosis<br>recorded in<br>medical<br>files | microbiological urine tests<br>(urine culture) and<br>presence of UTI<br>symptoms: Positive urine<br>culture (10 <sup>5</sup> CFUs/mL or<br>more of a urinary<br>pathogen in a specimen)<br>and at least one of the<br>following clinical<br>manifestations: local<br>symptoms, fever, mental<br>status change or delirium<br>or other symptoms (eg,<br>lower abdominal pain,<br>nausea or emesis, falls) | 104 patients with UTI<br>(of which 40 with delirium)<br>142 patients without UTI<br>(of which 11 with delirium)<br><br>OR: 7.44; 95% CI 3.58 - 15.46<br>p-value < 0.001<br>(7,41764691891689E-08)            |
| Gual, 2018<br>Spain                | Cohort,<br>prospective          | 909 patients<br>age ≥ 65 years<br>mean age 85.8 SD 6.7<br>male: 39.9 %  | clinical                               | Confusion<br>Assessment<br>Method<br>(CAM)   | diagnosis recorded in<br>medical files                                                                                                                                                                                                                                                                                                                                                                    | 352 patients with delirium<br>(of which 67 with UTI)<br>557 patients without delirium<br>(of which 35 with UTI)<br><br>OR: 3.51; 95% CI 2.27 - 5.41<br>p-value < 0.001<br>(1,41210196868968E-08)             |
| Jitapunkul, 1992<br>United Kingdom | Cohort,<br>prospective          | 184 patients<br>"elderly" patients<br>mean age 81.7 SD 6.6              | clinical                               | DSM-III-R<br>criteria                        | diagnosis recorded in<br>medical files                                                                                                                                                                                                                                                                                                                                                                    | 40 patients with delirium<br>(of which 5 with UTI)<br>144 patients without delirium                                                                                                                          |

|                                                                       |                                                                                          |                                                                                                                                                                                                  |          |                                              |                                        |                                                                                                                                                                    |
|-----------------------------------------------------------------------|------------------------------------------------------------------------------------------|--------------------------------------------------------------------------------------------------------------------------------------------------------------------------------------------------|----------|----------------------------------------------|----------------------------------------|--------------------------------------------------------------------------------------------------------------------------------------------------------------------|
|                                                                       |                                                                                          | male: 40.8 %                                                                                                                                                                                     |          |                                              |                                        | (of which 3 with UTI)<br>OR: 6.71; 95% CI 1.53 - 29.45<br>p-value 0.012                                                                                            |
| Khurana. 2002<br>India                                                | Cohort,<br>prospective                                                                   | 100 patients<br>age $\geq$ 65 years<br>mean age 71.3 SD 5.2<br>male: 64.0 %                                                                                                                      | clinical | ICD-10<br>research<br>criteria               | diagnosis recorded in<br>medical files | 27 patients with delirium<br>(of which 4 with UTI)<br>73 patients without delirium<br>(of which 2 with UTI)<br><br>OR: 6.17; 95% CI 1.06 - 35.93<br>p-value 0.043  |
| Kobayashi, 2017<br>Japan                                              | Cohort,<br>retrospective                                                                 | 262 patients<br>age $\geq$ 80 years<br>mean age 82.7 (range 80 - 91)<br>male: 46.6 %                                                                                                             | clinical | diagnosis<br>recorded in<br>medical<br>files | diagnosis recorded in<br>medical files | 15 patients with delirium<br>(of which 1 with UTI)<br>247 patients without delirium<br>(of which 5 with UTI)<br><br>OR: 3.46; 95% CI 0.38 - 31.63<br>p-value 0.272 |
| Large, 2013<br>USA                                                    | Cohort,<br>prospective                                                                   | 49 patients<br>age $\geq$ 65 years<br>median age in patients with<br>delirium: 77.8 (IQR: 73.5-<br>83.5)<br>median age in patients without<br>delirium: 73.1 (IQR 70.1-<br>76.5)<br>male: 81.6 % | clinical | Confusion<br>Assessment<br>Method<br>(CAM)   | diagnosis recorded in<br>medical files | 14 patients with delirium<br>(of which 6 with UTI)<br>35 patients without delirium<br>(of which 5 with UTI)<br><br>OR: 4.50; 95% CI 1.09 - 18.62<br>p-value 0.038  |
| Lundström, 2004<br>( <i>"paper IV"</i> in the dissertation)<br>Sweden | A control group<br>from an RCT,<br>was considered<br>by us as a<br>prospective<br>cohort | 96 patients<br>age $\geq$ 70 years<br>mean age 82 SD 5.6<br>male: 23.7 %                                                                                                                         | clinical | DSM-IV<br>criteria                           | diagnosis recorded in<br>medical files | 73 patients with delirium<br>(of which 44 with UTI)<br>23 patients without delirium<br>(of which 5 with UTI)<br><br>OR: 5.46; 95% CI 1.83 - 16.35<br>p-value 0.002 |
| Lundström, 2005<br>Sweden                                             | A control group<br>from an RCT,<br>was considered<br>by us as a                          | 200 patients<br>age $\geq$ 70 years<br>mean age 80.7 SD 6.2<br>male: 49.5 %                                                                                                                      | clinical | DSM-IV<br>criteria                           | diagnosis recorded in<br>medical files | 62 patients with delirium<br>(of which 3 with UTI)<br>138 patients without delirium<br>(of which 4 with UTI)                                                       |



|                          |                             |                                                                             |              |                                                       |                                     |                                                                                                                                                                                             |
|--------------------------|-----------------------------|-----------------------------------------------------------------------------|--------------|-------------------------------------------------------|-------------------------------------|---------------------------------------------------------------------------------------------------------------------------------------------------------------------------------------------|
|                          | prospective cohort          |                                                                             |              |                                                       |                                     | OR: 1.70; 95% CI 0.37 - 7.85<br>p-value 0.494                                                                                                                                               |
| Marcantonio, 2005<br>USA | Cohort, prospective         | 258 residents<br>age $\geq$ 65 years<br>mean age 82 SD 7.6<br>male: 67.1 %  | nursing home | Confusion Assessment Method (CAM)                     | diagnosis recorded in medical files | 188 residents with delirium (of which 22 with UTI)<br>70 residents without delirium (of which 5 with UTI)<br><br>OR: 1.72; 95% CI 0.63 - 4.74<br>p-value 0.292                              |
| Morandi, 2019<br>Italy   | Cohort, retrospective       | 519 patients<br>age $\geq$ 65 years<br>mean age 82.9 SD 9.4<br>male: 20.8 % | clinical     | Confusion Assessment Method (CAM)                     | diagnosis recorded in medical files | 77 patients with delirium (of which 35 with UTI)<br>442 patients without delirium (of which 101 with UTI)<br><br>OR: 2.81; 95% CI 1.71 - 4.64<br>p-value < 0.001<br>(0,0000510578613921453) |
| Olofsson, 2005<br>Sweden | Cohort, prospective         | 61 patients<br>age $\geq$ 70 years<br>mean age 82.6 SD 6.2<br>male: 34.4 %  | clinical     | DSM-IV criteria                                       | diagnosis recorded in medical files | 38 patients with delirium (of which 20 with UTI)<br>23 patients without delirium (of which 4 with UTI)<br><br>OR: 5.28; 95% CI 1.51 - 18.46<br>p-value 0.009                                |
| Olofsson, 2018<br>Sweden | Cohort, prospective         | 134 patients<br>age $\geq$ 70 years<br>mean age 82.2 SD 6.2<br>male: 25.2 % | clinical     | DSM-IV-TR criteria                                    | diagnosis recorded in medical files | 75 patients with delirium (of which 39 with UTI)<br>59 patients without delirium (of which 13 with UTI)<br><br>OR: 3.83; 95% CI 1.78 - 8.23<br>p-value 0.001                                |
| Perez-Ros, 2018<br>Spain | Case-control, retrospective | 306 residents<br>age $\geq$ 65 years<br>mean age 86 SD 7.2<br>male: 24.7 %  | nursing home | DSM-IV criteria and Confusion Assessment Method (CAM) | diagnosis recorded in medical files | 184 residents with delirium (of which 68 with UTI)<br>122 residents without delirium (of which 27 with UTI)<br><br>OR: 2.06; 95% CI 1.22 - 3.48<br>p-value 0.007                            |

|                                        |                                 |                                                                                                                                                                       |                                                                                                            |                                                                                   |                                                                                                                                                                           |                                                                                                                                                                                                   |
|----------------------------------------|---------------------------------|-----------------------------------------------------------------------------------------------------------------------------------------------------------------------|------------------------------------------------------------------------------------------------------------|-----------------------------------------------------------------------------------|---------------------------------------------------------------------------------------------------------------------------------------------------------------------------|---------------------------------------------------------------------------------------------------------------------------------------------------------------------------------------------------|
| Raats, 2015<br>Netherlands             | Cohort,<br>prospective          | 232 patients<br>age $\geq$ 65 years<br>median age in patients with<br>delirium: 80 (IQR 7)<br>median age in patients without<br>delirium: 75 (IQR 10)<br>male: 63.8 % | clinical                                                                                                   | DSM-IV<br>criteria and<br>Delirium<br>Observation<br>Screening<br>Scale<br>(DOSS) | diagnosis recorded in<br>medical files                                                                                                                                    | 35 patients with delirium<br>(of which 3 with UTI)<br>197 patients without delirium<br>(of which 5 with UTI)<br><br>OR: 3.60; 95% CI 0.82 - 15.81<br>p-value 0.090                                |
| Sandberg, 1999<br>Sweden               | Cross-sectional,<br>prospective | 717 participants<br>age $\geq$ 75 years<br>mean age 83.7 SD 5.2<br>male: 55.4 %                                                                                       | mixed<br>(hospital,<br>nursing<br>homes, old<br>people's<br>homes,<br>home<br>medical<br>care<br>patients) | DSM-III-R<br>criteria                                                             | diagnosis recorded in<br>medical files                                                                                                                                    | 315 participants with delirium<br>(of which 31 with UTI)<br>402 participants without<br>delirium<br>(of which 26 with UTI)<br><br>OR: 1.58; 95% CI 0.92 - 2.72<br>p-value 0.100                   |
| Schuurmans, 2003<br>Netherlands        | Cohort,<br>prospective          | 92 patients<br>age $\geq$ 70 years<br>mean age 82.7 SD 6.7<br>male: 13.0 %                                                                                            | clinical                                                                                                   | DSM-IV<br>criteria                                                                | diagnosis recorded in<br>medical files                                                                                                                                    | 18 patients with delirium<br>(of which 2 with UTI)<br>74 patients without delirium<br>(of which 3 with UTI)<br><br>OR: 2.96; 95% CI 0.46 - 19.19<br>p-value 0.256                                 |
| Stroomer-van Wijk, 2016<br>Netherlands | Case-control,<br>prospective    | 88 patients<br>age $\geq$ 70 years<br>mean age 86.5 SD 6.5<br>male: 23.9 %                                                                                            | clinical                                                                                                   | DSM-IV<br>criteria                                                                | diagnosis recorded in<br>medical files                                                                                                                                    | 44 patients with delirium<br>(of which 21 with UTI)<br>44 patients without delirium<br>(of which 2 with UTI)<br><br>OR: 19.17; 95% CI 4.12 - 89.16<br>p-value $<$ 0.001<br>(0,000165541776308231) |
| Wojszel, 2018<br>Poland                | Cohort,<br>prospective          | 286 patients<br>age $\geq$ 60 years<br>median age in patients with<br>UTI 84 (IQR 77-88)<br>median age in patients without<br>UTI 83 (IQR 78-87)<br>male: 37.4 %      | clinical                                                                                                   | Delirium<br>Observation<br>Screening<br>(DOS)<br>Scale                            | microbiological urine tests<br>(urine culture) and<br>presence of UTI<br>symptoms: A UTI was<br>defined as the presence of<br>a positive urine culture<br>(uncontaminated | 45 patients with UTI<br>(of which 13 with delirium)<br>241 patients without UTI<br>(of which 36 with delirium)<br><br>OR: 2.31; 95% CI 1.11 - 4.83<br>p-value 0.025                               |

|  |  |  |  |  |                                                                                                                                                                                                                                                                                                                                                                                                       |  |
|--|--|--|--|--|-------------------------------------------------------------------------------------------------------------------------------------------------------------------------------------------------------------------------------------------------------------------------------------------------------------------------------------------------------------------------------------------------------|--|
|  |  |  |  |  | midstream urine sample) accompanied by urinary symptoms (complaints of dysuria, increased frequency of urination, urgency, and/or abdominal discomfort, and/or presence of fever (> 38.0 °C), flank or low back pain) and included the occurrence of 10 <sup>5</sup> CFUs/mL or more of a urinary pathogen in a specimen (or 10 <sup>3</sup> CFUs/mL or more if the urinary sample was catheterized). |  |
|--|--|--|--|--|-------------------------------------------------------------------------------------------------------------------------------------------------------------------------------------------------------------------------------------------------------------------------------------------------------------------------------------------------------------------------------------------------------|--|

<sup>a</sup> full study reference is provided in the reference section in the main text of the publication

List of abbreviations in alphabetical order: CFU: colony-forming unit; CI: confidence interval; DSM: Diagnostic and Statistical Manual of Mental Disorders (number refers to the edition); ICD: International Classification of Diseases (number refers to the edition); IQR: interquartile range; OR: odds ratio; SD: standard deviation; UTI: urinary tract infection.

**Supplementary Table S2**

**Characteristics of the only included study reporting an association between delirium and asymptomatic bacteriuria in adults aged 65 years and over**

| <b>First author, year <sup>a</sup>, study country</b> | <b>Study design</b>         | <b>Number of participants, age of participants, % of male of participants</b> | <b>Study setting</b> | <b>Diagnosis of delirium</b>        | <b>Diagnosis of AB</b>                                                                                                                                                                                                                                                  | <b>Results</b>                                                                                                                                               |
|-------------------------------------------------------|-----------------------------|-------------------------------------------------------------------------------|----------------------|-------------------------------------|-------------------------------------------------------------------------------------------------------------------------------------------------------------------------------------------------------------------------------------------------------------------------|--------------------------------------------------------------------------------------------------------------------------------------------------------------|
| Gau, 2009<br>USA                                      | Case-control, retrospective | 192 patients<br>age ≥ 65 years<br>mean age 82.3 SD 8.0<br>male: 21.9 %        | clinical             | diagnosis recorded in medical files | absence of UTI symptoms in combination with urinalysis results demonstrating at least 50,000 CFU per milliliter of a single uropathogen, pyuria (urine leukocyte count of at least 2 neutrophils per high power field of spun urine), or nitrite positive test results. | 50 patients with AB (of which 6 with delirium)<br>142 patients without AB (of which 11 with delirium)<br><br>OR: 1.62; 95% CI: 0.57 - 4.65<br>p-value: 0.366 |

<sup>a</sup> full study reference is provided in the reference section in the main text of the publication

List of abbreviations in alphabetical order: AB: asymptomatic bacteriuria; CFU: colony-forming unit; CI: confidence interval; OR: odds ratio; SD: standard deviation, UTI: urinary tract infection.

**Supplementary Table S3**  
**The list of articles excluded at the full text screening phase**  
**with indication of reasons for exclusion**

| <b>N</b> | <b>Reference</b>                                                                                                                                                                                                                                                                                                           | <b>Reason for exclusion</b>                                                                                                 |
|----------|----------------------------------------------------------------------------------------------------------------------------------------------------------------------------------------------------------------------------------------------------------------------------------------------------------------------------|-----------------------------------------------------------------------------------------------------------------------------|
| 1        | Abawi M, Stella PR. Incidence, Predictive Factors and Impact of Delirium after Transcatheter Aortic Valve Implantation. <i>Journal of the American College of Cardiology</i> . 2015; 66(15, Suppl B): B249. DOI: 10.1016/j.jacc.2015.08.629                                                                                | No associations of interest: the study does not report UTI or asymptomatic bacteriuria                                      |
| 2        | Abawi M, Nijhoff F, Agostoni P, Emmelot-Vonk MH, De Vries R, Doevendans PA, Stella PR. Incidence, Predictive Factors, and Effect of Delirium After Transcatheter Aortic Valve Replacement. <i>JACC: Cardiovascular Interventions</i> . 2016; 9(2): 160-168. DOI: 10.1016/j.jcin.2015.09.037                                | No associations of interest: the study does not report UTI or asymptomatic bacteriuria                                      |
| 3        | Abdel-Halim M, Nicholson J, Hany T, Peristerakis I. Implementation of colorectal robotic surgery as part of a multidisciplinary robotic service, in a tertiary referral UK cancer centre. <i>Colorectal Disease</i> . 2018; 20: 57. DOI: 10.1111/codi.14386                                                                | No associations of interest: the study reports delirium and UTI/asymptomatic bacteriuria, but not in relation to each other |
| 4        | Adogwa O, Elsamadicy AA, Sergesketter A, Oyeyemi D, Galan D, Vuong VD, Khalid S, Cheng J, Bagley CA, Karikari IO. The Impact of Chronic Kidney Disease on Postoperative Outcomes in Patients Undergoing Lumbar Decompression and Fusion. <i>World Neurosurgery</i> . 2018; 110: e266-e270. DOI: 10.1016/j.wneu.2017.10.147 | No associations of interest: the study reports delirium and UTI/asymptomatic bacteriuria, but not in relation to each other |
| 5        | Adunsky A, Nenaydenko O, Koren-Morag N, Puritz L, Fleissig Y, Arad M. Perioperative urinary retention, short-term functional outcome and mortality rates of elderly hip fracture patients. <i>Geriatrics and Gerontology International</i> . 2015; 15(1): 65-71. DOI: 10.1111/ggi.12229                                    | No associations of interest: the study reports delirium and UTI/asymptomatic bacteriuria, but not in relation to each other |
| 6        | Aguirre JA. Refresher course: Regional anesthesia to avoid postoperative cognitive dysfunction: What is the evidence? <i>Regional Anesthesia and Pain Medicine</i> . 2015; 40(5): 36-38. DOI: 10.1097/AAP.0000000000000308                                                                                                 | Not a primary study (review/comment)                                                                                        |
| 7        | Ahmed S, Laurent B, Sampson EL. Risk factors for incident delirium among older people in acute hospital medical units: a systematic review and meta-analysis. <i>Age and Ageing</i> . 2014; 43(3): 326-333. DOI: 10.1093/ageing/afu022                                                                                     | Not a primary study (review/comment)                                                                                        |
| 8        | Akcam NO, Tasar PT, Ulusoy MG, Altinel C, Sarikaya OF, Sahin S, Duman S, Akcicek F, Noyan A. The effect of delirium on mortality. <i>Klinik Psikofarmakoloji Bulteni</i> . 2015; 25(Suppl 1): S129. ISSN: 1017-7833                                                                                                        | No associations of interest: the study does not report UTI or asymptomatic bacteriuria                                      |
| 9        | Akula M, Badhiwala J, Jiang F, Akula Y, Hulme C, Fehlings M. Does The Morbidity & Mortality Justify Lumbar Fusion Surgery In Older Adults? <i>Global Spine Journal</i> . 2018; 8: 252S-253S. DOI: 10.1177/2192568218771072                                                                                                 | Not a primary study (review/comment)                                                                                        |
| 10       | Alavi SM, Moogahi S. CONFUSION AND FEVER IN THE ELDERLY: THE NECESSITY OF LUMBAR PUNCTURE FOR CSF EXAMINATION. <i>Pakistan Journal of Medical Sciences</i> . 2008; 24(4): 520-524. ISSN: 1682-024X                                                                                                                         | No control group                                                                                                            |
| 11       | Alfonso DT, Toussaint RJ, Alfonso BD, Strauss EJ, Steiger DT, Di Cesare PE. Nonsurgical Complications After Total Hip and Knee Arthroplasty. <i>The American journal of Orthopedics (Belle Mead, NJ)</i> . 2006; 35(11): 503-510. PMID: 17152971                                                                           | Not a primary study (review/comment)                                                                                        |
| 12       | Aligue J, Baraldes A, Fons P, Bustamante E, Vives T, Guell I, Perez R. Home hospitalization unit: A cohort of 68                                                                                                                                                                                                           | No associations of interest: the study does not report delirium                                                             |

|    |                                                                                                                                                                                                                                                                                                                                                                   |                                                                                                                                                                                                                                                                                                                               |
|----|-------------------------------------------------------------------------------------------------------------------------------------------------------------------------------------------------------------------------------------------------------------------------------------------------------------------------------------------------------------------|-------------------------------------------------------------------------------------------------------------------------------------------------------------------------------------------------------------------------------------------------------------------------------------------------------------------------------|
|    | nonagenarian patients. <i>European Geriatric Medicine</i> . 2011; 2: S50. DOI: 10.1016/j.eurger.2011.06.002                                                                                                                                                                                                                                                       |                                                                                                                                                                                                                                                                                                                               |
| 13 | Al-Khaled M, Matthis C, Eggers J. Stroke Complications: Incidence and Effects on Stroke Outcomes-Data from the Stroke Registry in the Federal State in Schleswig-Holstein, Germany. <i>Neurology [Conference Publication: 65th American Academy of Neurology Annual Meeting. San Diego, CA United States]</i> . 2013; 80(7, Supplement): P04.071. ISSN: 0028-3878 | No associations of interest: the study reports delirium and UTI/asymptomatic bacteriuria, but not in relation to each other                                                                                                                                                                                                   |
| 14 | Alvarez-Nebreda M, Maranon E, Gonzalez de Villaumbrosia C, Gallego E, Gracia Y, Serra J. In-hospital mortality of elderly patients with hip fracture: clinical profile by causality. <i>Journal of the American Geriatrics Society</i> . 2010; 58: S73. DOI: 10.1111/j.1532-5415.2010.02850.x                                                                     | No associations of interest: the study reports delirium and UTI/asymptomatic bacteriuria, but not in relation to each other                                                                                                                                                                                                   |
| 15 | Anand AK, Kumar N, Gambhir IS. Clinicomicrobiological profile of the Indian elderly with sepsis. <i>Annals of Tropical Medicine and Public Health</i> . 2016; 9(5): 316-320. DOI: 10.4103/1755-6783.188525                                                                                                                                                        | No associations of interest: the study reports delirium and UTI/asymptomatic bacteriuria, but not in relation to each other                                                                                                                                                                                                   |
| 16 | Aslaner MA, Boz M, Boz M, Celik A, Ahmedali A, Eroglu S, Metin Aksu N, Eroglu SE. Etiologies and delirium rates of elderly ED patients with acutely altered mental status: a multicenter prospective study. <i>American Journal of Emergency Medicine</i> . 2017; 35(1): 71-76. DOI: 10.1016/j.ajem.2016.10.004                                                   | No associations of interest: the study reports delirium and UTI/asymptomatic bacteriuria, but not in relation to each other                                                                                                                                                                                                   |
| 17 | Asleh K, Sever R, Hilu S, Ron R, Gold A, Aharon M, Salai M, Justo D. Association Between Low Admission Norton Scale Scores and Postoperative Complications After Elective THA in Elderly Patients. <i>Orthopedics</i> . 2012; 35(9): e1302-e1306. DOI: 10.3928/01477447-20120822-13                                                                               | No associations of interest: the study reports delirium and UTI/asymptomatic bacteriuria, but not in relation to each other                                                                                                                                                                                                   |
| 18 | Assantachai P, Suwanagool S, Gherunpong V, Charoensook B. Urinary Tract Infection in the Elderly: A Clinical Study. <i>Journal of the Medical Association of Thailand</i> . 1997; 80(12): 753-759. PMID: 9470327                                                                                                                                                  | No associations of interest: the study reports delirium and UTI/asymptomatic bacteriuria, but not in relation to each other                                                                                                                                                                                                   |
| 19 | Assi MJ, Shaughnessy M. Demystifying delirium. <i>The American Nurse</i> . 2015; 47(4): 12. PMID: 26399081                                                                                                                                                                                                                                                        | Not a primary study (review/comment)                                                                                                                                                                                                                                                                                          |
| 20 | Atalay A, Mete G, Turhan N. THE EFFECT OF COMPLICATIONS ON REHABILITATION OUTCOME IN FIRST-EVER ISCHEMIC STROKE PATIENTS. <i>Cerebrovascular Diseases</i> . 2009; 27 (Suppl 6): 216. DOI: 10.1159/000221781                                                                                                                                                       | No associations of interest: the study reports delirium and UTI/asymptomatic bacteriuria, but not in relation to each other                                                                                                                                                                                                   |
| 21 | Avelino-Silva TJ, Farfel JM, Curiati JA, Amaral JR, Campora F, Jacob-Filho W. Comprehensive geriatric assessment predicts mortality and adverse outcomes in hospitalized older adults. <i>BMC Geriatrics</i> . 2014; 14: 129. DOI: 10.1186/1471-2318-14-129                                                                                                       | No associations of interest: the study reports delirium and UTI/asymptomatic bacteriuria, but not in relation to each other                                                                                                                                                                                                   |
| 22 | Avelino-Silva TJ, Farfel JM, Esper Curiati JA, Das Gracias Amaral JR, Campora F, Jacob-Filho W. Comprehensive Geriatric Assessment predicts mortality and adverse outcomes in hospitalized older adults. <i>Journal of the American Geriatrics Society</i> . 2015; 63: S80-S81. DOI: 10.1111/jgs.13439                                                            | Repetitive publication. The same data is provided in the article: Avelino-Silva TJ, Farfel JM, Curiati JA, Amaral JR, Campora F, Jacob-Filho W. Comprehensive geriatric assessment predicts mortality and adverse outcomes in hospitalized older adults. <i>BMC Geriatrics</i> . 2014; 14: 129. DOI: 10.1186/1471-2318-14-129 |
| 23 | Awad MI, Shuman AG, Montero PH, Palmer FL, Shah JP, Patel SG. Accuracy of administrative and clinical registry data in reporting postoperative complications after surgery for oral cavity squamous cell carcinoma. <i>Head and Neck</i> . 2015; 37(6): 851-861. DOI: 10.1002/hed.23682                                                                           | No associations of interest: the study reports delirium and UTI/asymptomatic bacteriuria, but not in relation to each other                                                                                                                                                                                                   |

|    |                                                                                                                                                                                                                                                                                                                      |                                                                                                                                                                                                                                                                                                                                           |
|----|----------------------------------------------------------------------------------------------------------------------------------------------------------------------------------------------------------------------------------------------------------------------------------------------------------------------|-------------------------------------------------------------------------------------------------------------------------------------------------------------------------------------------------------------------------------------------------------------------------------------------------------------------------------------------|
| 24 | Baeksted Jorgensen B, Gregersen M, Damsgaard EM. Is it possible to use physical-functional tests in an emergency department? <i>European Geriatric Medicine</i> . 2016; 7(Suppl 1): S36. ISSN: 1878-7649                                                                                                             | No associations of interest: the study reports delirium and UTI/asymptomatic bacteriuria, but not in relation to each other                                                                                                                                                                                                               |
| 25 | Bagnall NM, Malietzis G, Kennedy RH, Athanasiou T, Faiz O, Darzi A. A systematic review of enhanced recovery care after colorectal surgery in elderly patients. <i>Colorectal Disease</i> . 2014; 16(12): 947-956. DOI: 10.1111/codi.12718                                                                           | Not a primary study (review/comment)                                                                                                                                                                                                                                                                                                      |
| 26 | Bail K, Berry H, Grealish L, Draper B, Karmel R, Gibson D, Peut A. Potentially preventable complications of urinary tract infections, pressure areas, pneumonia, and delirium in hospitalised dementia patients: retrospective cohort study. <i>BMJ Open</i> . 2013; 3(6): e002770. DOI: 10.1136/bmjopen-2013-002770 | No associations of interest: the study reports delirium and UTI/asymptomatic bacteriuria, but not in relation to each other                                                                                                                                                                                                               |
| 27 | Bail K, Goss J, Draper B, Berry H, Karmel R, Gibson D. The cost of hospital-acquired complications for older people with and without dementia; a retrospective cohort study. <i>BMC Health Services Research</i> . 2015; 15: 91. DOI: 10.1186/s12913-015-0743-1                                                      | No associations of interest: the study reports delirium and UTI/asymptomatic bacteriuria, but not in relation to each other                                                                                                                                                                                                               |
| 28 | Bail K. 'FAILURE TO MAINTAIN' DEMENTIA PATIENTS IN HOSPITAL: A NEW METHOD OF QUALITY OUTCOME MEASUREMENT RELATED TO NURSING CARE. <i>Alzheimer's and Dementia</i> . 2016; 12(7): P222. DOI: 10.1016/j.jalz.2016.06.396                                                                                               | Repetitive publication. The same data is provided in the article: Bail K, Grealish L. 'Failure to Maintain': A theoretical proposition for a new quality indicator of nurse care rationing for complex older people in hospital. <i>International Journal of Nursing Studies</i> . 2016; 63: 146-161. DOI: 10.1016/j.ijnurstu.2016.08.001 |
| 29 | Bail K, Grealish L. 'Failure to Maintain': A theoretical proposition for a new quality indicator of nurse care rationing for complex older people in hospital. <i>International Journal of Nursing Studies</i> . 2016; 63: 146-161. DOI: 10.1016/j.ijnurstu.2016.08.001                                              | No associations of interest: the study reports delirium and UTI/asymptomatic bacteriuria, but not in relation to each other                                                                                                                                                                                                               |
| 30 | Bail K, Draper B, Berry H, Karmel R, Goss J. Predicting excess cost for older inpatients with clinical complexity: A retrospective cohort study examining cognition, comorbidities and complications. <i>PLoS ONE</i> . 2018; 13(2): e0193319. DOI: 10.1371/journal.pone.0193319                                     | No associations of interest: the study reports delirium and UTI/asymptomatic bacteriuria, but not in relation to each other                                                                                                                                                                                                               |
| 31 | Balasubramaniam M, Alici Y. Frequency of delirium and factors contributing to misdiagnosis among elderly patients admitted to an inpatient geriatric psychiatry unit. <i>American Journal of Geriatric Psychiatry</i> . 2012; 20(3, Suppl 1): S80-S81. DOI: 10.1097/01.JGP.0000413063.91948.64                       | Loss of quantitative data, the authors could not be contacted                                                                                                                                                                                                                                                                             |
| 32 | Balogun S, Philbrick JT. Delirium, A Symptom of UTI in the Elderly: Fact or Fable? A Systematic Review. <i>Journal of the American Medical Directors Association</i> . 2013; 14(3): B21. DOI: 10.1016/j.jamda.2012.12.059                                                                                            | Repetitive publication. The same data is provided in the article: Balogun SA, Philbrick JT. Delirium, a Symptom of UTI in the Elderly: Fact or Fable? A Systematic Review. <i>Canadian Geriatrics Journal</i> . 2013; 17(1): 22-26. DOI: 10.5770/cgj.17.90                                                                                |
| 33 | Balogun SA, Philbrick JT. Delirium, a Symptom of UTI in the Elderly: Fact or Fable? A Systematic Review. <i>Canadian Geriatrics Journal</i> . 2014; 17(1): 22-26. DOI: 10.5770/cgj.17.90                                                                                                                             | Not a primary study (review/comment)                                                                                                                                                                                                                                                                                                      |
| 34 | Bandara S, Lynch G, Cooke C, Varghese P, Ward N. Using Care Bundles to Improve Surgical Outcomes and Reduce Variation in Care for Fragility Hip Fracture Patients. <i>Geriatric Orthopaedic Surgery and Rehabilitation</i> . 2017; 8(2): 104-108. DOI: 10.1177/2151458516681634                                      | No associations of interest: the study reports delirium and UTI/asymptomatic bacteriuria, but not in relation to each other                                                                                                                                                                                                               |
| 35 | Barcelo M, Comas MT, Fuster G, Prats R, Gelpi M, Ruiz D. Differences between patients with and without delirium in                                                                                                                                                                                                   | Loss of quantitative data, the authors could not be contacted                                                                                                                                                                                                                                                                             |

|    |                                                                                                                                                                                                                                                                                                                                                                                                                                                                                     |                                                                                                                             |
|----|-------------------------------------------------------------------------------------------------------------------------------------------------------------------------------------------------------------------------------------------------------------------------------------------------------------------------------------------------------------------------------------------------------------------------------------------------------------------------------------|-----------------------------------------------------------------------------------------------------------------------------|
|    | geriatric ward. <i>European Geriatric Medicine</i> . 2011; 2: S5. DOI: 10.1016/j.eurger.2011.06.003                                                                                                                                                                                                                                                                                                                                                                                 |                                                                                                                             |
| 36 | Barkham TMS, Martin FC, Eykyn SJ. Delay in the Diagnosis of Bacteraemic Urinary Tract Infection in Elderly Patients. <i>Age and Ageing</i> . 1996; 25(2): 130-132. DOI: 10.1093/ageing/25.2.130                                                                                                                                                                                                                                                                                     | No associations of interest: the study reports delirium and UTI/asymptomatic bacteriuria, but not in relation to each other |
| 37 | Bartha E, Davidson T, Berg HE, Kalman S. A 1-year perspective on goal-directed therapy in elderly with hip fracture: Secondary outcomes. <i>Acta Anaesthesiologica Scandinavica</i> . 2019; 63(5): 610-614. DOI: 10.1111/aas.13320                                                                                                                                                                                                                                                  | No associations of interest: the study reports delirium and UTI/asymptomatic bacteriuria, but not in relation to each other |
| 38 | Beaupre LA, Cinats JG, Senthilselvan A, Lier D, Jones CA, Scharfenberger A, Johnston DWC, Saunders LD. Reduced morbidity for elderly patients with a hip fracture after implementation of a perioperative evidence-based clinical pathway. <i>Quality and Safety in Health Care</i> . 2006; 15(5): 375-379. DOI: 10.1136/qshc.2005.017095                                                                                                                                           | No associations of interest: the study reports delirium and UTI/asymptomatic bacteriuria, but not in relation to each other |
| 39 | Becker P, Bretschneider W, Tuschel A, Ogon M. Life Quality After Instrumented Lumbar Fusion in the Elderly. <i>Spine</i> . 2010; 35(15): 1478-1481. DOI: 10.1097/BRS.0b013e3181c62294                                                                                                                                                                                                                                                                                               | No associations of interest: the study reports delirium and UTI/asymptomatic bacteriuria, but not in relation to each other |
| 40 | Beloosesky Y, Hendel D, Hershkovitz A, Skribnic G, Grinblat J. Outcome of medically unstable elderly patients admitted to a geriatric ward after hip fracture. <i>Aging Clinical and Experimental Research</i> . 2001; 13(2): 78-84. DOI: 10.1007/bf03351529                                                                                                                                                                                                                        | No associations of interest: the study reports delirium and UTI/asymptomatic bacteriuria, but not in relation to each other |
| 41 | Beloosesky Y, Hershkovitz A, Solovey B, Salai M, Weiss A. Hip fracture post-operation dysnatremia and Na <sup>+</sup> -courses in different cognitive and functional patient groups. <i>Archives of Gerontology and Geriatrics</i> . 2011; 53(2): 179-182. DOI: 10.1016/j.archger.2010.10.014                                                                                                                                                                                       | No associations of interest: the study reports delirium and UTI/asymptomatic bacteriuria, but not in relation to each other |
| 42 | Beloosesky Y, Weiss A, Hershkovitz A, Hendel D, Barak V. Serum transforming growth factor beta-1 post hip fracture repair in elderly patients. <i>Cytokine</i> . 2011; 54(1): 56-60. DOI: 10.1016/j.cyto.2010.12.015                                                                                                                                                                                                                                                                | No associations of interest: the study does not report UTI or asymptomatic bacteriuria                                      |
| 43 | Berkovich R, Fernandez M, Subhani D. Monthly pulse adrenocorticotrophic hormone or methylprednisolone therapy for long-term treatment of multiple sclerosis as an add-on therapy to beta-interferons: interim results from a pilot study. <i>Multiple Sclerosis Journal</i> . 2011; 17(10): S249-S250. DOI: 10.1177/1352458511422300                                                                                                                                                | No associations of interest: the study reports delirium and UTI/asymptomatic bacteriuria, but not in relation to each other |
| 44 | Berry SD, Samelson EJ, Bordes M, Broe K, Kiel DP. Survival of Aged Nursing Home Residents With Hip Fracture. <i>The Journals of Gerontology Series A: Biological Sciences and Medical Sciences</i> . 2009; 64A(7): 771-777. DOI: 10.1093/gerona/64p019                                                                                                                                                                                                                              | No associations of interest: the study reports delirium and UTI/asymptomatic bacteriuria, but not in relation to each other |
| 45 | Bert ES, Cortiella A, Gomez P, Florensa J, Puig JM, Veciana L, Jorda G, Forcada IG, Garcia MC, Molto E, Qanneta R. Implementation of an orthogeriatric program. Results of the first two years. <i>International Journal of Integrated Care (IJIC)</i> . 2016; 16(6): A9, 1-8. DOI: 10.5334/ijic.2952                                                                                                                                                                               | No associations of interest: the study reports delirium and UTI/asymptomatic bacteriuria, but not in relation to each other |
| 46 | Beumer D, van Boxtel TH, Schipperen S, van Zwam WH, Lycklama a Nijeholt GJ, Brouwer PA, Jenniskens SFM, Schonewille WJ, Vos JA, van der Lugt A, Roos YB, Majoie CB, van Oostenbrugge RJ, Dippel DWJ. The relationship between interventionists' experience and clinical and radiological outcome in intra-arterial treatment for acute ischemic stroke. A MR CLEAN pretrial survey. <i>Journal of the Neurological Sciences</i> . 2017; 377: 97-101. DOI: 10.1016/j.jns.2017.04.002 | No associations of interest: the study reports neither delirium nor UTI/asymptomatic bacteriuria                            |



|    |                                                                                                                                                                                                                                                                                                                                |                                                                                                                                                                                                                                                                                                                                                                                                  |
|----|--------------------------------------------------------------------------------------------------------------------------------------------------------------------------------------------------------------------------------------------------------------------------------------------------------------------------------|--------------------------------------------------------------------------------------------------------------------------------------------------------------------------------------------------------------------------------------------------------------------------------------------------------------------------------------------------------------------------------------------------|
| 47 | Bhagat R, Bronsert MR, Juarez-Colunga E, Weyant MJ, Mitchell JD, Glebova NO, Henderson WG, Fullerton D, Meguid RA. Postoperative Complications Drive Unplanned Readmissions after Esophagectomy for Cancer. <i>The Annals of Thoracic Surgery</i> . 2018; 105(5): 1476-1482. DOI: 10.1016/j.athoracsur.2017.12.024             | No associations of interest: the study reports delirium and UTI/asymptomatic bacteriuria, but not in relation to each other                                                                                                                                                                                                                                                                      |
| 48 | Bhandari M, Koo H, Saunders L, Shaughnessy SG, Dunlop RB, Schemitsch EH. Predictors of In-Hospital Mortality Following Operative Management of Hip Fractures. <i>International Journal of Surgical Investigation</i> . 1999; 1(4): 319-326. PMID: 12774456                                                                     | No associations of interest: the study reports delirium and UTI/asymptomatic bacteriuria, but not in relation to each other                                                                                                                                                                                                                                                                      |
| 49 | Bhattacharya B, Maung A, Barre K, Maerz L, Rodriguez-Davalos MI, Schilsky M, Mulligan DC, Davis KA. Postoperative delirium is associated with increased intensive care unit and hospital length of stays after liver transplantation. <i>Journal of Surgical Research</i> . 2017; 207: 223-228. DOI: 10.1016/j.jss.2016.08.084 | Wrong age group                                                                                                                                                                                                                                                                                                                                                                                  |
| 50 | Bhattacharya B, Rodriguez-Davalos MI, Maerz L, Maung A, Schilsky M, Mulligan DC, Davis KA. Post-Operative Delirium is Associated with Increased ICU and Hospital Length of Stays Following Liver Transplantation. 2016; 100: S106. DOI: 10.1097/01.tp.0000483259.57907.d4                                                      | Repetitive publication. The same data is provided in the article: Bhattacharya B, Maung A, Barre K, Maerz L, Rodriguez-Davalos MI, Schilsky M, Mulligan DC, Davis KA. Postoperative delirium is associated with increased intensive care unit and hospital length of stays after liver transplantation. <i>Journal of Surgical Research</i> . 2017; 207: 223-228. DOI: 10.1016/j.jss.2016.08.084 |
| 51 | Biau D, Mullins MM, Judet T, Piriou P. Is Anyone Too Old for a Total Knee Replacement? <i>Clinical Orthopaedics and Related Research</i> . 2006; (448): 180-184. DOI: 10.1097/01.blo.0000194682.33000.f9                                                                                                                       | No associations of interest: the study reports delirium and UTI/asymptomatic bacteriuria, but not in relation to each other                                                                                                                                                                                                                                                                      |
| 52 | Bickel H, Hendlmeier I, Hessler JB, Junge MN, Leonhardt-Achilles S, Weber J, Schaeufele M. The Prevalence of Dementia and Cognitive Impairment in Hospitals. <i>Deutsches Arzteblatt International</i> . 2018; 115(44): 733-740. DOI: 10.3238/arztebl.2018.0733                                                                | No associations of interest: the study reports delirium and UTI/asymptomatic bacteriuria, but not in relation to each other                                                                                                                                                                                                                                                                      |
| 53 | Bitsch MS, Foss NB, Kristensen BB, Kehlet H. Acute cognitive dysfunction after hip fracture: frequency and risk factors in an optimized, multimodal, rehabilitation program. <i>Acta Anaesthesiologica Scandinavica</i> . 2006; 50(4): 428-436. DOI: 10.1111/j.1399-6576.2005.00899.x                                          | No associations of interest: the study reports delirium and UTI/asymptomatic bacteriuria, but not in relation to each other                                                                                                                                                                                                                                                                      |
| 54 | Blake RY, Fairfield K, Wierman H, Marino R. Factors associated with acute care readmissions from a skilled nursing facility. <i>Journal of the American Geriatrics Society</i> . 2012; 60: S187. DOI: 10.1111/j.1532-5415.2012.04000.x                                                                                         | No associations of interest: the study reports delirium and UTI/asymptomatic bacteriuria, but not in relation to each other                                                                                                                                                                                                                                                                      |
| 55 | Blodgett TJ. The reliability and diagnostic validity of clinical manifestations of catheter-associated urinary tract infection in hospitalized adults: a pilot study. Dissertation, University of Iowa. 2013. DOI: 10.17077/etd.mwuoozpa                                                                                       | No associations of interest: the study does not report UTI or asymptomatic bacteriuria                                                                                                                                                                                                                                                                                                           |
| 56 | Blodgett TJ, Gardner SE, Blodgett NP, Peterson LV, Pietraszak M. A Tool to Assess the Signs and Symptoms of Catheter-Associated Urinary Tract Infection: Development and Reliability. <i>Clinical Nursing Research</i> . 2014; 24(4): 341-356. DOI: 10.1177/1054773814550506                                                   | No control group                                                                                                                                                                                                                                                                                                                                                                                 |
| 57 | Blom BJ, van Dis H, Simons MP, Willems WJ. The Relationship Between Surgical Delay for a Hip Fracture and the Complication Risk. [Dutch]. <i>Nederlands Tijdschrift voor Geneeskunde</i> . 2007; 151(37): 2050-2054. PMID: 17929715                                                                                            | No associations of interest: the study reports delirium and UTI/asymptomatic bacteriuria, but not in relation to each other                                                                                                                                                                                                                                                                      |
| 58 | Boettcher WG. Total Hip Arthroplasties in the Elderly: Morbidity, Mortality, and Cost Effectiveness. <i>Clinical</i>                                                                                                                                                                                                           | No associations of interest: the study reports delirium and UTI/asymptomatic                                                                                                                                                                                                                                                                                                                     |

|    |                                                                                                                                                                                                                                                                                                                                                                       |                                                                                                                                                                                                                                                                                     |
|----|-----------------------------------------------------------------------------------------------------------------------------------------------------------------------------------------------------------------------------------------------------------------------------------------------------------------------------------------------------------------------|-------------------------------------------------------------------------------------------------------------------------------------------------------------------------------------------------------------------------------------------------------------------------------------|
|    | Orthopaedics and Related Research. 1992; (274): 30-34. PMID: 1729017                                                                                                                                                                                                                                                                                                  | bacteriuria, but not in relation to each other                                                                                                                                                                                                                                      |
| 59 | Boockvar K, Signor D, Ramaswamy R, Hung W. Delirium During Acute Illness in Nursing Home Residents. Journal of the American Medical Directors Association. 2013; 14(9): 656-660. DOI: 10.1016/j.jamda.2013.06.004                                                                                                                                                     | Loss of quantitative data (the study reports data about acute illness episodes and not about rates of UTI or asymptomatic bacteriuria in patients with and without delirium)                                                                                                        |
| 60 | Boockvar KS, Hung W, Liu S, Siegel J, Kwak J, Singleton J, Signor D. Delirium during Acute Illness (AI) in Nursing Home Residents. Journal of the American Geriatrics Society. 2011; 59: S16. DOI: 10.1111/j.1532-5415.2011.03415.x                                                                                                                                   | Repetitive publication. The same data is provided in the article: Boockvar K, Signor D, Ramaswamy R, Hung W. Delirium During Acute Illness in Nursing Home Residents. Journal of the American Medical Directors Association. 2013; 14(9): 656-660. DOI: 10.1016/j.jamda.2013.06.004 |
| 61 | Bouloussa H, Alzakri A, Ghailane S, Vergari C, Mazas S, Vital JM, Coudert P, Gille O. Is it safe to perform lumbar spine surgery on patients over eighty five? International Orthopaedics. 2017; 41(10): 2091-2096. DOI: 10.1007/s00264-017-3555-6                                                                                                                    | No associations of interest: the study reports neither delirium nor UTI/asymptomatic bacteriuria                                                                                                                                                                                    |
| 62 | Bourassa-Moreau E, Versteeg A, Moskven E, Charest-Morin R, Flexman A, Ailon T, Dalkilic T, Fisher C, Dea N, Boyd M, Paquette S, Kwon B, Dvorak M, Street J. Sarcopenia, but not frailty predicts early mortality and adverse events after emergent surgery for metastatic disease of the spine. The Spine Journal. 2020; 20: 22-31. DOI: 10.1016/j.spinee.2019.08.012 | No associations of interest: the study reports delirium and UTI/asymptomatic bacteriuria, but not in relation to each other                                                                                                                                                         |
| 63 | Brodak M, Tomasek J, Pacovsky J, Hholub L, Husek P. Urological surgery in elderly patients: results and complications. Clinical Interventions in Aging. 2015; 10: 379-385. DOI: 10.2147/CIA.S73381                                                                                                                                                                    | No associations of interest: the study reports delirium and UTI/asymptomatic bacteriuria, but not in relation to each other                                                                                                                                                         |
| 64 | Brown CA, Boling J, Manson M, Owens T, Zura R. Relation Between Prefracture Characteristics and Perioperative Complications in the Elderly Adult Patient with Hip Fracture. Southern Medical Journal. 2012; 105(6): 306-310. DOI: 10.1097/SMJ.0b013e3182574bfd                                                                                                        | No associations of interest: the study reports delirium and UTI/asymptomatic bacteriuria, but not in relation to each other                                                                                                                                                         |
| 65 | Brunelli A, Drosos P, Ismail H, Pompili C, Bassi V. Factors associated with postoperative costs following anatomic lung resections without major complications. European Journal of Cardio-Thoracic Surgery. 2017; 51(2): 230-235. DOI: 10.1093/ejcts/ezw307                                                                                                          | No associations of interest: the study reports delirium and UTI/asymptomatic bacteriuria, but not in relation to each other                                                                                                                                                         |
| 66 | Cahill CW, Schwarzkopf R, Sinha S, Scott RD. Simultaneous Bilateral Knee Arthroplasty in Octogenarians: Can It Be Safe and Effective? The Journal of Arthroplasty. 2014; 29(5): 998-1000. DOI: 10.1016/j.arth.2013.10.026                                                                                                                                             | No associations of interest: the study reports delirium and UTI/asymptomatic bacteriuria, but not in relation to each other                                                                                                                                                         |
| 67 | Caljouw MA, den Elzen WP, Cools HJ, Gussekloo J. Predictive factors of urinary tract infections among the oldest old in the general population. a population-based prospective follow-up study. BMC Medicine. 2011; 9:57. DOI: 10.1186/1741-7015-9-57                                                                                                                 | No associations of interest: the study does not report delirium                                                                                                                                                                                                                     |
| 68 | Campion EW, Jette AM, Cleary PD, Harris BA. Hip Fracture: A Prospective Study of Hospital Course, Complications, and Costs. Journal of General Internal Medicine. 1987; 2(2): 78-82. DOI: 10.1007/bf02596300                                                                                                                                                          | No associations of interest: the study reports delirium and UTI/asymptomatic bacteriuria, but not in relation to each other                                                                                                                                                         |
| 69 | Carbone LD, Chin AS, Burns SP, Svircev JN, Hoenig H, Heggeness M, Weaver F. Morbidity following lower extremity fractures in men with spinal cord injury. Osteoporosis International. 2013; 24(8): 2261-2267. DOI: 10.1007/s00198-013-2295-8                                                                                                                          | No associations of interest: the study reports delirium and UTI/asymptomatic bacteriuria, but not in relation to each other                                                                                                                                                         |

|    |                                                                                                                                                                                                                                                                                                                                                                                       |                                                                                                                             |
|----|---------------------------------------------------------------------------------------------------------------------------------------------------------------------------------------------------------------------------------------------------------------------------------------------------------------------------------------------------------------------------------------|-----------------------------------------------------------------------------------------------------------------------------|
| 70 | Caterino JM, Kline DM, Leininger R, Southerland LT, Carpenter CR, Baugh CW, Pallin DJ, Hunold KM, Stevenson KB. Nonspecific Symptoms Lack Diagnostic Accuracy for Infection in Older Patients in the Emergency Department. <i>Journal of the American Geriatrics Society</i> . 2019; 67(3): 484-492. DOI: 10.1111/jgs.15679                                                           | Loss of quantitative data, the authors were contacted but did not provide the necessary data.                               |
| 71 | Ceravolo MJ, Alfano C, Geniere Nigra S, Cuzzoni G, Venturini L, Ricevuti G. Delirium in a geriatric population suffering from dementia: Complication or picture at the onset? <i>European Geriatric Medicine</i> . 2017; 8(1): S86. ISSN: 1878-7649                                                                                                                                   | Loss of quantitative data, the authors could not be contacted                                                               |
| 72 | Chae JHJ, Miller BJ. Beyond Urinary Tract Infections (UTIs) and Delirium: A Systematic Review of UTIs and Neuropsychiatric Disorders. <i>Journal of Psychiatric Practice</i> . 2015; 21(6): 402-411. DOI: 10.1097/PRA.000000000000105                                                                                                                                                 | Not a primary study (review/comment)                                                                                        |
| 73 | Chan KC, Gill GS. Cemented Hemiarthroplasties for Elderly Patients With Intertrochanteric Fractures. <i>Clinical Orthopaedics and Related Research</i> . 2000; 371: 206-215. DOI: 10.1097/00003086-200002000-00025                                                                                                                                                                    | No associations of interest: the study reports delirium and UTI/asymptomatic bacteriuria, but not in relation to each other |
| 74 | Chang CC, Lin PH, Chang YT, Chen NC, Huang CW, Lui CC, Huang SH, Chang YH, Lee CC, Lai WA. The Impact of Admission Etiology on Recurrent or Frequent Admission. A Hospital-Based Cohort Comparing Three Dementia Subtypes with 4 Years Longitudinal Follow-ups. <i>Medicine (United States)</i> . 2015; 94(46): e2091. DOI: 10.1097/MD.0000000000002091                               | No associations of interest: the study reports delirium and UTI/asymptomatic bacteriuria, but not in relation to each other |
| 75 | Chen BY, Cote R, Vieira L, Benjamin L, Legault C. Delays in the Emergency Department, Medical Complications of Stroke and Predictors of Clinical Outcomes: The McGill experience. <i>Neurology [Conference Publication: 68th American Academy of Neurology Annual Meeting, Vancouver, BC, Canada]</i> . 2016; 86 (16, Supplement): P2.310. ISSN: 0028-3878                            | No associations of interest: the study reports delirium and UTI/asymptomatic bacteriuria, but not in relation to each other |
| 76 | Cheung A, Street J, Noonan V, Cartar L, Dvorak M. Incidence and Impact of Acute Adverse Events in Patients with Traumatic Spinal Cord Injury. <i>The Spine Journal</i> . 2011; 11(10): 2S. DOI: 10.1016/j.spinee.2011.08.018                                                                                                                                                          | No associations of interest: the study reports delirium and UTI/asymptomatic bacteriuria, but not in relation to each other |
| 77 | Chit Lwin S, Goh KS, Poon KB, Chow WL. Preliminary Evaluation of Valued Care Hip Fracture Programme in Changi General Hospital (CGH). <i>Annals of the Academy of Medicine Singapore</i> . 2016; 45(9): S44. ISSN: 0304-4602                                                                                                                                                          | No associations of interest: the study reports delirium and UTI/asymptomatic bacteriuria, but not in relation to each other |
| 78 | Cho KJ, Suk SI, Park SR, Kim JH, Kim SS, Choi WK, Lee KY, Lee SR. Complications in Posterior Fusion and Instrumentation for Degenerative Lumbar Scoliosis. <i>Spine</i> . 2007; 32(20): 2232-2237. DOI: 10.1097/BRS.0b013e31814b2d3c                                                                                                                                                  | No associations of interest: the study reports delirium and UTI/asymptomatic bacteriuria, but not in relation to each other |
| 79 | Choi JY, Yoon SJ, Kim SW, Jung HW, Kim KI, Kang E, Kim SW, Han HS, Kim CH. Prediction of Postoperative Complications Using Multidimensional Frailty Score in Older Female Cancer Patients with American Society of Anesthesiologists Physical Status Class 1 or 2. <i>Journal of the American College of Surgeons</i> . 2015; 221(3): 652-660. DOI: 10.1016/j.jamcollsurg.2015.06.011 | No associations of interest: the study reports delirium and UTI/asymptomatic bacteriuria, but not in relation to each other |
| 80 | Choi JY, Cho KJ, Kim S, Yoon SJ, Kang M, Kim K, Lee YK, Koo KH, Kim CH. Prediction of Mortality and Postoperative Complications using the Hip-Multidimensional Frailty Score in Elderly Patients with Hip Fracture. <i>Scientific Reports</i> . 2017; 7: 42966. DOI: 10.1038/srep42966                                                                                                | No associations of interest: the study reports delirium and UTI/asymptomatic bacteriuria, but not in relation to each other |

|    |                                                                                                                                                                                                                                                                                                                                                                                                  |                                                                                                                             |
|----|--------------------------------------------------------------------------------------------------------------------------------------------------------------------------------------------------------------------------------------------------------------------------------------------------------------------------------------------------------------------------------------------------|-----------------------------------------------------------------------------------------------------------------------------|
| 81 | Choi S, Na H, Nah S, Kang H, Han S. Is brain imaging necessary for febrile elderly patients with altered mental status? A retrospective multicenter study. PLOS ONE. 2020; 15(7): e0236763. DOI: 10.1371/journal.pone.0236763                                                                                                                                                                    | No associations of interest: the study does not report delirium                                                             |
| 82 | Chong CPW, Savage JA, Lim WK. Medical problems in hip fracture patients. Archives of Orthopaedic and Trauma Surgery. 2010; 130(11): 1355-1361. DOI: 10.1007/s00402-009-1038-y                                                                                                                                                                                                                    | Not a primary study (review/comment)                                                                                        |
| 83 | Chu C, Griffiths P, Asquith P, Naidoo C, Horsley J, McDonald P. 9 HOW ACCURATE IS OUR DIAGNOSIS OF A URINARY TRACT INFECTION? Age and Ageing. 2014; 43(Suppl 1): i2-i3. DOI: 10.1093/ageing/afu036.9                                                                                                                                                                                             | No associations of interest: the study reports delirium and UTI/asymptomatic bacteriuria, but not in relation to each other |
| 84 | Churchill C. COGNITIVE IMPAIRMENT AND FALLS IN THE OLDER ADULT POPULATION: INCIDENCE AND OUTCOMES IN A LEVEL ONE TRAUMA CENTER. Dissertation, University of North Carolina at Charlotte. 2014.                                                                                                                                                                                                   | No associations of interest: the study reports delirium and UTI/asymptomatic bacteriuria, but not in relation to each other |
| 85 | Churchill C, Seymour R, Patt J, Karunakar M. Outcomes of Cognitively Impaired Hip Fracture Patients at a Level One Trauma Center. Journal of the American Geriatrics Society. 2016; 64: S216-S217. DOI: 10.1111/jgs.14231                                                                                                                                                                        | No associations of interest: the study reports delirium and UTI/asymptomatic bacteriuria, but not in relation to each other |
| 86 | Cleary M, Smithwick S, Keesling S, Riggs A, Podrazik P, Simmons S, Caradine D, Mendiratta P, Mohammed A, Azhar G, Wei J. Effective reduction of 30-day hospital readmission rates. Journal of the American Geriatrics Society. 2013; 61: S174. DOI: 10.1111/jgs.12263                                                                                                                            | No associations of interest: the study reports neither delirium nor UTI/asymptomatic bacteriuria                            |
| 87 | Cogdill BR, Ross CA, Hurst JM, Garrison KL, Drayton SJ, Wisniewski CS. EVALUATION OF URINALYSES ORDERED FOR DIAGNOSIS OF URINARY TRACT INFECTIONS AT AN INPATIENT PSYCHIATRIC HOSPITAL. The International Journal of Psychiatry in Medicine. 2014; 47(1): 17-24. DOI: 10.2190/PM.47.1.b                                                                                                          | Wrong age group                                                                                                             |
| 88 | Cole PA, Gilbertson JA, Cole PA. Functional Outcomes of Operative Management of Scapula Fractures in a Geriatric Cohort. Journal of Orthopaedic Trauma. 2017; 31(1): e1-e8. DOI: 10.1097/BOT.0000000000000710                                                                                                                                                                                    | No associations of interest: the study reports delirium and UTI/asymptomatic bacteriuria, but not in relation to each other |
| 89 | Colprim D, Calle A, Robles MAJ, Cervera AMA, Miralles R. Incidence of nosocomial infections in an intermediate and long-term care unit: psychophysical decline as an atypical clinical manifestation. European Geriatric Medicine. 2010; 1: S137-S138. DOI: 10.1016/j.eurger.2010.07.009                                                                                                         | Loss of quantitative data, the authors could not be contacted                                                               |
| 90 | Contin AM, Perez-Jara J, Alonso-Contin A, Enguix A, Ramos F. Postoperative delirium after elective orthopedic surgery. International Journal of Geriatric Psychiatry. 2005; 20(6): 595-597. DOI: 10.1002/gps.1335                                                                                                                                                                                | No associations of interest: the study does not report UTI or asymptomatic bacteriuria                                      |
| 91 | Copanitsanou P, Grivas TB. Nursing Care of Hospitalised Orthopaedic Patients. [Greek]. Scientific Chronicles. 2018; 23(2): 122-137. DOI: 10.11212/exronika/2018.2.2                                                                                                                                                                                                                              | Not a primary study (review/comment)                                                                                        |
| 92 | Cortes-Penfield NW, Trautner BW, Jump RLP. Urinary Tract Infection and Asymptomatic Bacteriuria in Older Adults. Infectious Disease Clinics of North America. 2017; 31(4): 673-688. DOI: 10.1016/j.idc.2017.07.002                                                                                                                                                                               | Not a primary study (review/comment)                                                                                        |
| 93 | Costa CDAO, Camargo JJ, Schio SM, Melo IA, Machuca T, Sanchez L, Camargo SM, Perin FA, Felicetti JC, Nogueira A, Lobato V. Experience in the intensive management of early postoperative lung transplantation patients of the Complexo Hospitalar Santa Casa Group of Porto Alegre, Brazil. Critical Care [Conference Publication: Fifth International Symposium on Intensive Care and Emergency | No associations of interest: the study does not report UTI or asymptomatic bacteriuria                                      |

|     |                                                                                                                                                                                                                                                                                                                                                            |                                                                                                                                                                                                                                                                      |
|-----|------------------------------------------------------------------------------------------------------------------------------------------------------------------------------------------------------------------------------------------------------------------------------------------------------------------------------------------------------------|----------------------------------------------------------------------------------------------------------------------------------------------------------------------------------------------------------------------------------------------------------------------|
|     | Medicine for Latin America, Sao Paulo, Brazil]. 2009; 13(Suppl 3): P38. DOI: 10.1186/cc7840                                                                                                                                                                                                                                                                |                                                                                                                                                                                                                                                                      |
| 94  | Coventry LL, Pickles S, Sin M, Towell A, Giles M, Murray K, Twigg DE. Impact of the Orthopaedic Nurse Practitioner role on acute hospital length of stay and cost-savings for patients with hip fracture: A retrospective cohort study. <i>Journal of Advanced Nursing</i> . 2017; 73(11): 2652-2663. DOI: 10.1111/jan.13330                               | No associations of interest: the study reports delirium and UTI/asymptomatic bacteriuria, but not in relation to each other                                                                                                                                          |
| 95  | Cuciureanu I, Cuciureanu T. Acute confusional state and recovery in aged patient with vascular risk factors in neurology unit - A challenging etiology. <i>International Journal of Stroke</i> . 2015; 10(2 supplement): 377. DOI: 10.1111/ijss.12479                                                                                                      | No control group                                                                                                                                                                                                                                                     |
| 96  | Cuesta-Peredo D, Arteaga-Moreno F, Belenguer-Varea A, Llopis-Calatayud JE, Sivera-Gimeno S, Santaegenia SJ, Avellana-Zaragoza JA, Tarazona-Santabalbina FJ. Influence of hospital adverse events and previous diagnoses on hospital care cost of patients with hip fracture. <i>Archives of Osteoporosis</i> . 2019; 14:88. DOI: 10.1007/s11657-019-0638-6 | No associations of interest: the study reports delirium and UTI/asymptomatic bacteriuria, but not in relation to each other                                                                                                                                          |
| 97  | Culp K, Tripp-Reimer T, Wadle K, Wakefield B, Akins J, Mobily P, Kundratt M. Screening for Acute Confusion in Elderly Long-Term Care Residents. <i>Journal of Neuroscience Nursing</i> . 1997; 29(2): 86-100. DOI: 10.1097/01376517-199704000-00003                                                                                                        | No control group                                                                                                                                                                                                                                                     |
| 98  | Cunha PTSD, Artifon AN, Lima DP, Marques WV, Rahal MA, Ribeiro RR, Kitadai FT. HIP FRACTURES IN THE ELDERLY: SURGICAL TREATMENT TIMING AND ITS CORRELATION WITH DELIRIUM AND INFECTION. <i>Acta Ortopédica Brasileira</i> . 2008; 16(3): 173-176. DOI: 10.1590/S1413-78522008000300010                                                                     | No associations of interest: the study reports delirium and UTI/asymptomatic bacteriuria, but not in relation to each other                                                                                                                                          |
| 99  | Dahl MH, Rønning OM, Thommessen B. Delirium in acute stroke-prevalence and risk factors. <i>Acta Neurologica Scandinavica</i> . 2010; 122(Suppl 190): 39-43. DOI: 10.1111/j.1600-0404.2010.01374.x                                                                                                                                                         | Loss of quantitative data, the authors could not be contacted                                                                                                                                                                                                        |
| 100 | Dahl M, Thommessen B, Ronning OM. DELIRIUM IN ACUTE STROKE – PREVALENCE AND RISK FACTORS. <i>Cerebrovascular Diseases</i> . 2010; 29(2): 290. DOI: 10.1159/000321266                                                                                                                                                                                       | Repetitive publication. The same data is provided in the article: Dahl MH, Rønning OM, Thommessen B. Delirium in acute stroke-prevalence and risk factors. <i>Acta Neurologica Scandinavica</i> . 2010; 122(Suppl 190): 39-43. DOI: 10.1111/j.1600-0404.2010.01374.x |
| 101 | Dasgupta M, Brymer C, Elsayed S. Treatment of asymptomatic UTI in older delirious medical in-patients: A prospective cohort study. <i>Archives of Gerontology and Geriatrics</i> . 2017; 72: 127-134. DOI: 10.1016/j.archger.2017.05.010                                                                                                                   | No control group                                                                                                                                                                                                                                                     |
| 102 | Datieva VK. Acute decompensation of Parkinson's disease. <i>Movement Disorders</i> . 2012; 27(Suppl 1): S505. DOI: 10.1002/mds.25051                                                                                                                                                                                                                       | No associations of interest: the study reports delirium and UTI/asymptomatic bacteriuria, but not in relation to each other                                                                                                                                          |
| 103 | De Jong L, van Rijckevorsel VAJIM, Raats JW, Klem TMAL, Kuijper TM, Roukema GR. Delirium after hip hemiarthroplasty for proximal femoral fractures in elderly patients: risk factors and clinical outcomes. <i>Clinical Interventions in Aging</i> . 2019; 14: 427-435. DOI: 10.2147/CIA.S189760                                                           | Loss of quantitative data, the authors could not be contacted                                                                                                                                                                                                        |
| 104 | De Tena Fontaneda AF, Ramos Cortes MR. Admission for urinary infection in institutionalized elderly in nursing homes: Micro-organisms, complications and outcomes.                                                                                                                                                                                         | No control group                                                                                                                                                                                                                                                     |

|     |                                                                                                                                                                                                                                                                                                                                                                   |                                                                                                                                                                                  |
|-----|-------------------------------------------------------------------------------------------------------------------------------------------------------------------------------------------------------------------------------------------------------------------------------------------------------------------------------------------------------------------|----------------------------------------------------------------------------------------------------------------------------------------------------------------------------------|
|     | European Geriatric Medicine. 2011; 2: S108. DOI: 10.1016/j.eurger.2011.06.002                                                                                                                                                                                                                                                                                     |                                                                                                                                                                                  |
| 105 | Dea N, Versteeg A, Fisher C, Kelly A, Hartig D, Boyd M, Paquette S, Kwon BK, Dvorak M, Street J. Adverse events in emergency oncological spine surgery: a prospective analysis. <i>Journal of Neurosurgery: Spine</i> . 2014; 21(5): 698-703. DOI: 10.3171/2014.7.SPINE131007                                                                                     | No associations of interest: the study reports delirium and UTI/asymptomatic bacteriuria, but not in relation to each other                                                      |
| 106 | Decheva K. Operative management and clinical outcomes of cervical spine injuries in patients over 80 years of age. <i>European Spine Journal</i> . 2016; 25: 3825. DOI: 10.1007/s00586-016-4801-0                                                                                                                                                                 | No associations of interest: the study reports delirium and UTI/asymptomatic bacteriuria, but not in relation to each other                                                      |
| 107 | Deer T, Saulino MF, Moss R, Rauck RL, Kim P, Wallace MS, Huang IZ, Mori F, Vanhove GF, McDowell G. SUSTAINED EFFECTIVNESS OF INTRATHECAL ZICONOYIDE USE AS THE FIRST AGENT IN PUMP IN PATIENTS WITH SEVERE CHRONIC PAIN. <i>Pain Physician</i> . 2016; 19: E798-E799. ISSN: 2150-1149                                                                             | No associations of interest: the study reports neither delirium nor UTI/asymptomatic bacteriuria                                                                                 |
| 108 | Dehn LB. CONFUSION AND BACTERIURIA IN LONG-TERM CARE FACILITY RESIDENTS. <i>Journal of the American Geriatrics Society</i> . 2018; 66(6): 1235. DOI: 10.1111/jgs.15318                                                                                                                                                                                            | Not a primary study (review/comment)                                                                                                                                             |
| 109 | Diggs A, Bhatnagar A, Ferrer GF, Dabul L, Way RW, Oms J, Sanchez M. PREDICTORS OF ACUTE PSYCHOSIS IN NON-SCHIZOPHRENIC PATIENTS WITH URINARY TRACT INFECTION: INFLAMMATION AS A TRIGGER OF PSYCHOSIS. <i>Psychosomatic Medicine</i> . 2016; 78: A119-A120. DOI: 10.1097/PSY.0000000000000343                                                                      | Loss of quantitative data, the authors could not be contacted                                                                                                                    |
| 110 | DiPiro CV, DiPiro JT. Urinary Tract Infections in the Elderly. <i>Journal of Geriatric Drug Therapy</i> . 1995; 10(1): 69-78. DOI: 10.1300/J089v10n01_06                                                                                                                                                                                                          | Not a primary study (review/comment)                                                                                                                                             |
| 111 | Dittrich T, Tschudin-Sutter S, Widmer AF, Ruegg S, Marsch S, Sutter R. Risk factors for new-onset delirium in patients with bloodstream infections: independent and quantitative effect of catheters and drainages - a four-year cohort study. <i>Annals of Intensive Care</i> . 2016; 6(1): 104. DOI: 10.1186/s13613-016-0205-x                                  | No associations of interest: the study does not report UTI or asymptomatic bacteriuria (there are only indications of the urogenital tract as a source of bloodstream infection) |
| 112 | Domka E, Myjkowska E, Kwolek A. Incidence of neuromedical complications during rehabilitation after stroke. [Polish]. <i>Neurologia i Neurochirurgia Polska</i> . 2005; 39(4): 300-309. PMID: 16096935                                                                                                                                                            | No associations of interest: the study reports delirium and UTI/asymptomatic bacteriuria, but not in relation to each other                                                      |
| 113 | Donegan DJ, Gay AN, Baldwin K, Morales EE, Esterhai Jr JL, Mehta S. Use of Medical Comorbidities to Predict Complications After Hip Fracture Surgery in the Elderly. <i>The Journal of Bone and Joint Surgery – American Volume</i> . 2010; 92(4): 807-813. DOI: 10.2106/JBJS.I.00571                                                                             | No associations of interest: the study reports neither delirium nor UTI/asymptomatic bacteriuria                                                                                 |
| 114 | Dong J, Yang Y, Chen Z, Yu M, Liu B, Wang Q, Xie P, Chen R, Rong L. Comparative study of microendoscope-assisted and conventional minimally invasive transforaminal lumbar interbody fusion for degenerative lumbar diseases. [Chinese]. <i>Chinese journal of reparative and reconstructive surgery</i> . 2019; 33(7): 814-821. DOI: 10.7507/1002-1892.201903112 | No associations of interest: the study reports delirium and UTI/asymptomatic bacteriuria, but not in relation to each other                                                      |
| 115 | Dorman T, Adamczyk E, Synder M, Sibinski M. Elective total hip arthroplasty for patients 75 years of age and older. [Polish]. <i>Chirurgia Narzadow Ruchu i Ortopedia Polska</i> . 2008; 73(3): 163-166. PMID: 18847021                                                                                                                                           | No associations of interest: the study reports delirium and UTI/asymptomatic bacteriuria, but not in relation to each other                                                      |
| 116 | Dovjak P, Iglseder B, Mikosch P, Gosch M, Muller E, Pinter G, Pils K, Gerstofer I, Thaler H, Zmaritz M, Weissenberger-Leduc M, Muller W. Treatment and prevention of postoperative complications in hip fracture patients: infections and delirium. <i>Wiener Medizinische</i>                                                                                    | Not a primary study (review/comment)                                                                                                                                             |

|     |                                                                                                                                                                                                                                                                                                                                                                                |                                                                                                                             |
|-----|--------------------------------------------------------------------------------------------------------------------------------------------------------------------------------------------------------------------------------------------------------------------------------------------------------------------------------------------------------------------------------|-----------------------------------------------------------------------------------------------------------------------------|
|     | Wochenschrift. 2013; 163: 448-454. DOI: 10.1007/s10354-013-0228-y                                                                                                                                                                                                                                                                                                              |                                                                                                                             |
| 117 | Ducharme J, Neilson S, Ginn JL. Can urine cultures and reagent test strips be used to diagnose urinary tract infection in elderly emergency department patients without focal urinary symptoms? Canadian Journal of Emergency Medicine. 2007; 9(2): 87-92. DOI: 10.1017/s1481803500014846                                                                                      | No associations of interest: the study does not report delirium                                                             |
| 118 | Dupuis M, Guay L, Therrien J, Garant MP, Beaudoin A, Lemay F. Adjuvant Chemotherapy in Elderly Patients with Colon Cancer: A Retrospective Study. The American Journal of Gastroenterology. 2013; 108: S176. DOI: 10.1038/ajg.2013.266                                                                                                                                         | No associations of interest: the study does not report UTI or asymptomatic bacteriuria                                      |
| 119 | Dylan F, Byrne G, Mudge AM. Delirium risk in non-surgical patients: systematic review of predictive tools. Archives of Gerontology and Geriatrics. 2019; 83: 292-302. DOI: 10.1016/j.archger.2019.05.013                                                                                                                                                                       | Not a primary study (review/comment)                                                                                        |
| 120 | Eide LSP, Ranhoff AH, Lauck S, Fridlund B, Haaverstad R, Hufthammer KO, Kuiper KJ, Nordrehaug JE, Norekval TM. Indwelling urinary catheters, aortic valve treatment and delirium: a prospective cohort study. BMJ Open. 2018; 8:e021708. DOI: 10.1136/bmjopen-2018-021708                                                                                                      | No associations of interest: the study does not report UTI or asymptomatic bacteriuria                                      |
| 121 | Elsamadicy AA, Adogwa O, Lydon E, Sergesketter A, Kaakati R, Mehta AI, Vasquez RA, Cheng J, Bagley CA, Karikari IO. Depression as an independent predictor of postoperative delirium in spine deformity patients undergoing elective spine surgery. Journal of Neurosurgery: Spine. 2017; 27(2): 209-214. DOI: 10.3171/2017.4.SPINE161012                                      | No associations of interest: the study reports delirium and UTI/asymptomatic bacteriuria, but not in relation to each other |
| 122 | Elsamadicy AA, Adogwa O, Reddy GB, Sergesketter A, Warwick H, Jones T, Cheng J, Bagley CA, Karikari IO. Risk Factors and Independent Predictors of 30-Day Readmission for Altered Mental Status After Elective Spine Surgery for Spine Deformity: A Single-Institutional Study of 1090 Patients. World Neurosurgery. 2017; 101: 270-274. DOI: 10.1016/j.wneu.2017.02.001       | No associations of interest: the study reports delirium and UTI/asymptomatic bacteriuria, but not in relation to each other |
| 123 | Elsamadicy AA, Adogwa O, Sergesketter A, Hobbs C, Behrens S, Mehta AI, Vasquez RA, Cheng J, Bagley CA, Karikari IO. Impact of Race on 30-Day Complication Rates after Elective Complex Spinal Fusion ( $\geq 5$ Levels): A Single Institutional Study of 446 Patients. World Neurosurgery. 2017; 99: 418-423. DOI: 10.1016/j.wneu.2016.12.029                                  | No associations of interest: the study reports delirium and UTI/asymptomatic bacteriuria, but not in relation to each other |
| 124 | Elsamadicy AA, Adogwa O, Warwick H, Sergesketter A, Lydon E, Shammas RL, Mehta AL, Vasquez RA, Cheng J, Bagley CA, Karikari IO. Increased 30-Day Complication Rates Associated with Laminectomy in 874 Adult Spine Deformity Patients Undergoing Elective Spinal Fusion: A Single Institutional Study. World Neurosurgery. 2017; 102: 370-375. DOI: 10.1016/j.wneu.2017.03.096 | No associations of interest: the study reports delirium and UTI/asymptomatic bacteriuria, but not in relation to each other |
| 125 | Elsamadicy AA, Adogwa O, Ongele M, Sergesketter AR, Tarnasky A, Lubkin DET, Drysdale N, Cheng J, Bagley CA, Karikari IO. Preoperative Hemoglobin Level is Associated with Increased Health Care Use After Elective Spinal Fusion ( $\geq 3$ Levels) in Elderly Male Patients with Spine Deformity. World Neurosurgery. 2018; 112: e348-e354. DOI: 10.1016/j.wneu.2018.01.046   | No associations of interest: the study reports delirium and UTI/asymptomatic bacteriuria, but not in relation to each other |
| 126 | Elsamadicy AA, Sergesketter A, Adogwa O, Ongele M, Gottfried ON. Complications and 30-Day readmission rates after craniotomy/craniectomy: A single Institutional study of 243 consecutive patients. Journal of Clinical Neuroscience. 2018; 47: 178-182. DOI: 10.1016/j.jocn.2017.09.021                                                                                       | No associations of interest: the study reports delirium and UTI/asymptomatic bacteriuria, but not in relation to each other |

|     |                                                                                                                                                                                                                                                                                                                                                    |                                                                                                                                                                                                                                                                                           |
|-----|----------------------------------------------------------------------------------------------------------------------------------------------------------------------------------------------------------------------------------------------------------------------------------------------------------------------------------------------------|-------------------------------------------------------------------------------------------------------------------------------------------------------------------------------------------------------------------------------------------------------------------------------------------|
| 127 | Eriksson I. Urinary tract infection - a serious health problem in old women. Dissertation, Umeå University. 2011. ISBN: 978-91-7459-164-4                                                                                                                                                                                                          | Repetitive publication. The same data is provided in the article: Eriksson I, Gustafson Y, Fagerström L, Olofsson B. Urinary tract infection in very old women is associated with delirium. <i>International Psychogeriatrics</i> . 2011; 23(03): 496-502. DOI: 10.1017/S1041610210001456 |
| 128 | Espauella J, Guyer H, Diaz-Escriu F, Mellado-Navas JA, Castells M, Pladevall M. Nutritional supplementation of elderly hip fracture patients. A randomized, double-blind, placebo-controlled trial. <i>Age and Ageing</i> . 2000; 29(5): 425-431. DOI: 10.1093/ageing/29.5.425                                                                     | No associations of interest: the study reports delirium and UTI/asymptomatic bacteriuria, but not in relation to each other                                                                                                                                                               |
| 129 | Espina-Perez B, Caro-Tarrago A, Vallverdu-Rivero A, Feliu-Villaro F, Escuder-Perez J, Sole-Baiges T, Jorba-Martín R, Millan-Scheidig M. A tailored prehabilitation-ERAS programme improves postoperative outcomes in elderly patients with colorectal cancer. <i>Colorectal Disease</i> . 2018; 20(Suppl 4): 62. DOI: 10.1111/%28ISSN%291463-1318  | No associations of interest: the study reports delirium and UTI/asymptomatic bacteriuria, but not in relation to each other                                                                                                                                                               |
| 130 | Estabrooks CA, Hoben M, Poss JW, Chamberlain SA, Thompson GN, Silviu JL, Norton PG. Dying in a Nursing Home: Treatable Symptom Burden and its Link to Modifiable Features of Work Context. <i>Journal of the American Medical Directors Association</i> . 2015; 16(6): 515-520. DOI: 10.1016/j.jamda.2015.02.007                                   | No associations of interest: the study reports delirium and UTI/asymptomatic bacteriuria, but not in relation to each other                                                                                                                                                               |
| 131 | Everson J, Gupta P, Kaneshamoorthy M, Jegard J, Bafadhel L. URINALYSIS AND UTI IN GERIATRIC PATIENTS – A REVIEW OF PERFORMANCE IN A DISTRICT GENERAL HOSPITAL. <i>Age and Ageing</i> . 2019; 48: i32-i35. DOI: 10.1093/ageing/afy204.11                                                                                                            | No associations of interest: the study does not report delirium                                                                                                                                                                                                                           |
| 132 | Faezah SK, Zhang D, Yin LF. THE PREVALENCE AND RISK FACTORS OF DELIRIUM AMONGST THE ELDERLY IN ACUTE HOSPITAL. <i>Singapore Nursing Journal</i> . 2008; 35(1): 11-14. ISSN: 0218-2475                                                                                                                                                              | No control group                                                                                                                                                                                                                                                                          |
| 133 | Fan H, Ji M, Huang J, Yue P, Yang X, Wang C, Ying W. Development and validation of a dynamic delirium prediction rule in patients admitted to the Intensive Care Units (DYNAMIC-ICU): A prospective cohort study. <i>International Journal of Nursing Studies</i> . 2019; 93: 64-73. DOI: 10.1016/j.ijnurstu.2018.10.008                           | Loss of quantitative data, the authors could not be contacted                                                                                                                                                                                                                             |
| 134 | Feldt KS, Griffin PL. Delirium in Hip-Fractured Elders. <i>Clinical Gerontologist: The Journal of Aging and Mental Health</i> . 1999; 20(2): 75-78. DOI: 10.1300/J018v20n02_07                                                                                                                                                                     | No associations of interest: wrong diagnostic process (the method of establishing a diagnosis of delirium does not meet the protocol requirements)                                                                                                                                        |
| 135 | Felix C, Andre A, Azevedo P, Machado H, Ferreira F, Basilio C, Nzwalo H. PREDICTORS OF HYPERACTIVE DELIRIUM IN PATIENTS WITH SPONTANEOUS INTRACEREBRAL HEMORRHAGE. <i>European Stroke Journal [Conference Publication: 5th European Stroke Organisation Conference, ESOC 2019. Italy]</i> . 2019; 4(Suppl 1): 543. DOI: 10.1177/2F2396987319845581 | No associations of interest: the study does not report UTI or asymptomatic bacteriuria                                                                                                                                                                                                    |
| 136 | Fick D. DELIRIUM SUPERIMPOSED ON DEMENTIA: A REVIEW OF OCCURRENCE AND OUTCOMES. <i>Research and Practice in Alzheimer's Disease</i> . 2006; 11: 347-351. ISBN: 2914377959, 9782914377959                                                                                                                                                           | Not a primary study (review/comment)                                                                                                                                                                                                                                                      |
| 137 | Finger T, Radjabi A, Sternchos J, Nezhaf F. COMPLICATION RATES BETWEEN VIDEOLAPAROSCOPIC VERSUS ROBOTIC-ASSISTED LAPAROSCOPY IN MANAGEMENT OF EARLY,                                                                                                                                                                                               | No associations of interest: the study reports delirium and UTI/asymptomatic bacteriuria, but not in relation to each other                                                                                                                                                               |



|     |                                                                                                                                                                                                                                                                                                                                                                           |                                                                                                                             |
|-----|---------------------------------------------------------------------------------------------------------------------------------------------------------------------------------------------------------------------------------------------------------------------------------------------------------------------------------------------------------------------------|-----------------------------------------------------------------------------------------------------------------------------|
|     | ADVANCED AND RECURRENT OVARIAN, FALLOPIAN AND PERITONEAL CANCER. The International Journal of Gynecological Cancer. 2012; 22(8, supplement 3): E442. DOI: 10.1097/01.IGC.0000422085.58592.d3                                                                                                                                                                              |                                                                                                                             |
| 138 | Finger T, Radjabi A, Sternchos J, Nezhat F. Comparison of Complication Rates between Videolaparoscopic Versus Robotic-Assisted Laparoscopy in the Evaluation and Management of Early, Advanced and Recurrent Stage Ovarian, Fallopian Tube and Primary Peritoneal Cancer. Journal of Minimally Invasive Gynecology. 2012; 19(6): S11-S12. DOI: 10.1016/j.jmig.2012.08.044 | No associations of interest: the study reports delirium and UTI/asymptomatic bacteriuria, but not in relation to each other |
| 139 | Folbert EC, Hegeman JH, Gierveld R, van Netten JJ, van der Velde D, Ten Duis HJ, Slaets JP. Complications during hospitalization and risk factors in elderly patients with hip fracture following integrated orthogeriatric treatment. Archives of Orthopaedic and Trauma Surgery. 2017; 137(4): 507-515. DOI: 10.1007/s00402-017-2646-6                                  | No associations of interest: the study reports delirium and UTI/asymptomatic bacteriuria, but not in relation to each other |
| 140 | Fombuena Moreno M, Espinar Cid MV, Tolosa Martinez N, Navarro Sanz R. Incidence of nosocomial infections and symptoms associated to oncological terminal patients. [Spanish]. Medicina Paliativa. 2004; 11(2): 83-88. ISSN: 1134-248X                                                                                                                                     | Loss of quantitative data, the authors could not be contacted                                                               |
| 141 | Galivanche AR, Kebaish KJ, Adrados M, Ottesen TD, Varthi AG, Rubin LE, Grauer JN. Postoperative Pressure Ulcers After Geriatric Hip Fracture Surgery Are Predicted by Defined Preoperative Comorbidities and Postoperative Complications. The Journal of the American Academy of Orthopaedic Surgeons. 2020; 28(8): 342-351. DOI: 10.5435/JAAOS-D-19-00104                | No associations of interest: the study reports delirium and UTI/asymptomatic bacteriuria, but not in relation to each other |
| 142 | Gallardo MS, Anton A, Pulido Herrero E, Larruscain MI, Guinea Suarez R, Garcia Gutierrez S, Sandoval Negral JC. Effectiveness of a home hospitalization program for patients with urinary tract infection after discharge from an emergency department. [Spanish]. Emergencias. 2017; 29(5): 313-319. PMID: 29077290                                                      | No control group                                                                                                            |
| 143 | Gandhi GY, Nuttall GA, Abel MD, Mullany CJ, Schaff HV, Williams BA, Schrader LM, Rizza RA, McMahan MM. Intraoperative Hyperglycemia and Perioperative Outcomes in Cardiac Surgery Patients. Mayo Clinic Proceedings. 2005; 80(7): 862-866. DOI: 10.4065/80.7.862                                                                                                          | No associations of interest: the study reports delirium and UTI/asymptomatic bacteriuria, but not in relation to each other |
| 144 | Garcia Almarza S, Machado Vera M, Teran Benzaquen C, Mora Fernandez J. Delirium and functional decline in elderly hip fracture. European Geriatric Medicine. 2011; 2: S149. DOI: 10.1016/j.eurger.2011.06.002                                                                                                                                                             | Loss of quantitative data, the authors could not be contacted                                                               |
| 145 | Garcia-Cabrera L, Vaquero Pinto N, Miret Corchado C, Fernandez-Villaseca S, Montero Errasquin B, Alvarez Nebreda ML, Cruz-Jentoft AJ. Delaying hip fracture surgery increases perioperative complications. European Geriatric Medicine. 2016; 7(Suppl 1): S22-S23. ISSN: 1878-7649                                                                                        | No associations of interest: the study reports delirium and UTI/asymptomatic bacteriuria, but not in relation to each other |
| 146 | Garcia Fernaendez JA, Martin De Francisco Murga E, Flores Aunoen A, Castejon Morales G, Alonso Bouzon C, Rodriguez-Manas L. Importance of the delay of surgery in elderly patients with hip fracture. European Geriatric Medicine. 2011; 2: S182. DOI: 10.1016/j.eurger.2011.06.002                                                                                       | No associations of interest: the study reports delirium and UTI/asymptomatic bacteriuria, but not in relation to each other |
| 147 | Gargiulo G, De Salvo F, Ruggieri N. RESULTS AND COMPLICATIONS IN THORACOLUMBAR SPINAL SURGERY IN PATIENTS AGED OVER 70 YEAR. European Spine Journal. 2012; 21: 763. DOI: 10.1007/s00586-012-2290-3                                                                                                                                                                        | No associations of interest: the study reports delirium and UTI/asymptomatic bacteriuria, but not in relation to each other |

|     |                                                                                                                                                                                                                                                                                                                                            |                                                                                                                                                                                                                                                                              |
|-----|--------------------------------------------------------------------------------------------------------------------------------------------------------------------------------------------------------------------------------------------------------------------------------------------------------------------------------------------|------------------------------------------------------------------------------------------------------------------------------------------------------------------------------------------------------------------------------------------------------------------------------|
| 148 | Gargiulo G, De Salvo F, Ruggieri N. Results and complications in thoraco-lumbar spine surgery in patients aged over 70 years. <i>Journal of Orthopaedics and Traumatology</i> . 2013; 14(Suppl 1): S41. DOI: 10.1007/s10195-013-0258-7                                                                                                     | Repetitive publication. The same data is provided in the article: Gargiulo G, De Salvo F, Ruggieri N. RESULTS AND COMPLICATIONS IN THORACOLUMBAR SPINAL SURGERY IN PATIENTS AGED OVER 70 YEAR. <i>European Spine Journal</i> . 2012; 21: 763. DOI: 10.1007/s00586-012-2290-3 |
| 149 | Gau JT, Clay S. DIAGNOSTIC ACCURACY OF CRITERIA FOR URINARY TRACT INFECTION IN NURSING HOMES. <i>Journal of the American Geriatrics Society</i> . 2008; 56(3): 571. DOI: 10.1111/j.1532-5415.2008.01583.x                                                                                                                                  | Not a primary study (review/comment)                                                                                                                                                                                                                                         |
| 150 | Gelfand MS, Mazumder SA, Cleveland KO. Bacteriuria in Delirious Individuals. <i>The American Journal of Medicine</i> . 2014; 127(4):255-7. <i>American Journal of Medicine</i> . 2014; 127(10): e15. DOI: 10.1016/j.amjmed.2014.04.023                                                                                                     | Not a primary study (review/comment)                                                                                                                                                                                                                                         |
| 151 | Ghika J. Delirium in the elderly patient. [French]. <i>Medecine et Hygiene</i> . 1997; 55(2164): 1037-1041. ISSN: 0025-6749                                                                                                                                                                                                                | Not a primary study (review/comment)                                                                                                                                                                                                                                         |
| 152 | Gillick MR, Serrell NA, Gillick LS. ADVERSE CONSEQUENCES OF HOSPITALIZATION IN THE ELDERLY. <i>Social Science and Medicine</i> . 1982; 16(10): 1033-1038. DOI: 10.1016/0277-9536(82)90175-7                                                                                                                                                | No associations of interest: the study reports delirium and UTI/asymptomatic bacteriuria, but not in relation to each other                                                                                                                                                  |
| 153 | Gisbert Barrue R, Brull Royo M, Dominguez Lopez MDLO, Mulet Aloras E, Chavarria Gisbert J, Cajigas Sanchez P, Estupina Vitutia S. Clinical profile of patients admitted to an inpatient long-term care facility. <i>European Geriatric Medicine</i> . 2011; 2: S129-S130. DOI: 10.1016/j.eurger.2011.06.002                                | No associations of interest: the study reports delirium and UTI/asymptomatic bacteriuria, but not in relation to each other                                                                                                                                                  |
| 154 | Glennie RA, Ailon T, Yung K, Batke J, Vaccaro AR, Fehlings MG, Arnold P, Harrop JS, Street JT. Incidence, impact, and risk factors of adverse events in thoracic and lumbar spine fractures: an ambispective cohort analysis of 390 patients. <i>The Spine Journal</i> . 2015; 15(4): 629-637. DOI: 10.1016/j.spinee.2014.11.016           | No associations of interest: the study reports delirium and UTI/asymptomatic bacteriuria, but not in relation to each other                                                                                                                                                  |
| 155 | Gold A, Sever R, Lerman Y, Salai M, Justo D. Admission Norton scale scores (ANSS) and postoperative complications following hip fracture surgery in the elderly. <i>Archives of Gerontology and Geriatrics</i> . 2012; 55(1): 173-176. DOI: 10.1016/j.archger.2011.07.004                                                                  | No associations of interest: the study reports delirium and UTI/asymptomatic bacteriuria, but not in relation to each other                                                                                                                                                  |
| 156 | Gompelman M, Rozemeijer W, Kortmann W. A life-threatening complication of an ordinary urinary tract infection? <i>The Netherlands Journal of Medicine</i> . 2014; 72(9): 502, 505. PMID: 25431400                                                                                                                                          | Case report/series                                                                                                                                                                                                                                                           |
| 157 | Gonen I, Umul M, Kaya O, Temel EN, Kose SA, Unal O, Pala HZ, Akcam FZ. CLINICAL AND LABORATORY EVALUATION OF URINARY TRACT INFECTIONS IN ELDERLY POPULATION. <i>Acta Medica Mediterranea</i> . 2013; 29(4): 853-858. ISSN: 0393-6384                                                                                                       | No control group                                                                                                                                                                                                                                                             |
| 158 | Gonzalez L, Puerta R, Fernandez F, Lamas JL, Valle L, De La Fuente J. What is the role of delirium in patients with hip fracture? <i>European Journal of Internal Medicine</i> . 2013; 24: e257-e258. DOI: 10.1016/j.ejim.2013.08.663                                                                                                      | Loss of quantitative data, the authors could not be contacted                                                                                                                                                                                                                |
| 159 | Gopal GK, Wilson BP, Viggswarpu S, Sathyendra S, Iyyadurai R, Visvanathan R, Mathews KP. Clinical Profile and Predictors of Outcomes in Older Inpatients with Pyelonephritis in a Tertiary Care Hospital in Southern India. <i>Journal of Clinical and Diagnostic Research</i> . 2015; 9(10): OC05-OC07. DOI: 10.7860/JCDR/2015/15964.6616 | No associations of interest: the study reports delirium and UTI/asymptomatic bacteriuria, but not in relation to each other                                                                                                                                                  |

|     |                                                                                                                                                                                                                                                                                           |                                                                                                                                                                                                                  |
|-----|-------------------------------------------------------------------------------------------------------------------------------------------------------------------------------------------------------------------------------------------------------------------------------------------|------------------------------------------------------------------------------------------------------------------------------------------------------------------------------------------------------------------|
| 160 | Greene S, Cogan N, Briggs R, Coughlan T, O'Neill D, McCabe D, Murphy S, Waish R, Collins R. Neuromedical Sequelae Post-Stroke. Irish Journal of Medical Science. 2014; 183(Suppl 7): S332. DOI: 10.1007/s11845-014-1177-1                                                                 | No associations of interest: the study reports delirium and UTI/asymptomatic bacteriuria, but not in relation to each other                                                                                      |
| 161 | Griebing TL. Re: Urinary Tract Infection in Very Old Women is Associated With Delirium [Editorial Comment]. The Journal of Urology. 2011; 186(2): 548-549. DOI: 10.1016/S0022-5347(11)60358-3                                                                                             | Not a primary study (review/comment)                                                                                                                                                                             |
| 162 | Groschel K, Ernemann U, Riecker A, Schmidt F, Terborg C, Kastrup A. Incidence and risk factors for medical complications after carotid artery stenting. Journal of Vascular Surgery. 2005; 42(6): 1101-1106. DOI: 10.1016/j.ejvim.2013.08.663                                             | No associations of interest: the study reports delirium and UTI/asymptomatic bacteriuria, but not in relation to each other                                                                                      |
| 163 | Gui XG, Ru XL, Jiang ZH, Song BS. Analysis of perioperative complications of percutaneous kyphoplasty for osteoporotic vertebral compression fracture. [Chinese]. China Journal of Orthopaedics and Traumatology. 2013; 26(3): 205-209. PMID: 23795437                                    | No associations of interest: the study reports delirium and UTI/asymptomatic bacteriuria, but not in relation to each other                                                                                      |
| 164 | Gunckle EP. Delirium Psychosis in the Inpatient General Medical Setting and Its Relationship to Morbidity, Mortality, Length of Stay, and Additional Healthcare Costs During Hospitalization. Dissertation, Walden University. 2011. ISBN: 978-1-124-62565-2                              | Wrong control group (the number of cases of urinary tract infection and other comorbid diagnoses for the delirium group was used as the basis for determining the sample of cases used for the comparison group) |
| 165 | Gustafson Y. ACUTE CONFUSIONAL STATE (DELIRIUM): Clinical studies in hip-fracture and stroke patients. Dissertation, Umeå University. 1991. ISBN: 91-7174-594-7                                                                                                                           | Loss of quantitative data, the authors could not be contacted                                                                                                                                                    |
| 166 | Gustafson Y, Olsson T, Eriksson S, Asplund K, Bucht G. Acute Confusional States (Delirium) in Stroke Patients. Cerebrovascular Diseases. 1991; 1(5): 257-264. DOI: 10.1159/000108852                                                                                                      | Wrong age group                                                                                                                                                                                                  |
| 167 | Gustafson Y. Outcomes of hip fractures: Rehabilitation programmes: Comprehensive Geriatric Assessment and Rehabilitation-a prerequisite for successful treatment of people who have suffered a hip-fracture. European Geriatric Medicine. 2012; 3: S19. DOI: 10.1016/j.eurger.2012.07.413 | No associations of interest: the study reports delirium and UTI/asymptomatic bacteriuria, but not in relation to each other                                                                                      |
| 168 | Haavisto M, Geiger U, Mattila K, Rajala S. A HEALTH SURVEY OF THE VERY AGED IN TAMPERE, FINLAND. Age and Ageing. 1984; 13(5): 266-272. DOI: 10.1093/ageing/13.5.266                                                                                                                       | No associations of interest: the study reports delirium and UTI/asymptomatic bacteriuria, but not in relation to each other                                                                                      |
| 169 | Haayman J, Stobberingh EE. Urinary tract infections in long-term care facility residents. Future Microbiology. 2018; 13: 9-12. DOI: 10.2217/fmb-2017-0183                                                                                                                                 | Not a primary study (review/comment)                                                                                                                                                                             |
| 170 | Hanna SJ, Woolley R, Brown L, Kesavan S. The coming of age of a joint elderly medicine-psychiatric ward: 18 years' experience. International Journal of Clinical Practice. 2008; 62(1): 148-151. DOI: 10.1111/j.1742-1241.2007.01504.x                                                    | No associations of interest: the study reports delirium and UTI/asymptomatic bacteriuria, but not in relation to each other                                                                                      |
| 171 | Hao D, Xie E. MORBIDITY AND MORTALITY OF MAJOR ADULT SPINAL SURGERY: AN AMBISPECTIVE COHORT ANALYSIS OF 977 PATIENTS. European Spine Journal. 2016; 25(Suppl 3): S399. DOI: 10.1016/j.spinee.2017.08.040                                                                                  | No associations of interest: the study reports delirium and UTI/asymptomatic bacteriuria, but not in relation to each other                                                                                      |
| 172 | Hatton KW, Flynn JD, Lalloo C, Fahy BG. Integrating Evidence-Based Medicine Into the Perioperative Care of Cardiac Surgery Patients. Journal of Cardiothoracic and Vascular Anesthesia. 2011; 25(2): 335-346. DOI: 10.1053/j.jvca.2010.06.002                                             | Not a primary study (review/comment)                                                                                                                                                                             |

|     |                                                                                                                                                                                                                                                                                                                                                                                                                                                          |                                                                                                                             |
|-----|----------------------------------------------------------------------------------------------------------------------------------------------------------------------------------------------------------------------------------------------------------------------------------------------------------------------------------------------------------------------------------------------------------------------------------------------------------|-----------------------------------------------------------------------------------------------------------------------------|
| 173 | Heisler CA, Melton III LJ, Weaver AL, Gebhart JB. Determining Perioperative Complications Associated with Vaginal Hysterectomy: Code Classification Versus Chart Review. <i>Journal of the American College of Surgeons</i> . 2009; 209(1): 119-122. DOI: 10.1016/j.jamcollsurg.2009.03.017                                                                                                                                                              | No associations of interest: the study reports delirium and UTI/asymptomatic bacteriuria, but not in relation to each other |
| 174 | Hensey N, Meiring R, Athavale N. URINARY TRACT INFECTIONS: ARE WE OVER-DIAGNOSING THEM? <i>Age and Ageing</i> . 2013; 42: ii14. DOI: 10.1093/ageing/aft016                                                                                                                                                                                                                                                                                               | No control group                                                                                                            |
| 175 | Hernandez M, Martin G, Salazar R, Ceballos N. Infectious diseases in elderly institutionalised admitted to a acute geriatric unit infectious diseases in elderly institutionalised admitted to a acute geriatric unit. <i>European Geriatric Medicine</i> . 2011; 2: S194. DOI: 10.1016/j.eurger.2011.06.002                                                                                                                                             | No associations of interest: the study reports delirium and UTI/asymptomatic bacteriuria, but not in relation to each other |
| 176 | Hufschmidt A, Shabarin V, Rauer S, Zimmer T. Neurological Symptoms Accompanying Urinary Tract Infections. <i>European Neurology</i> . 2010; 63: 180-183. DOI: 10.1159/000289098                                                                                                                                                                                                                                                                          | No control group                                                                                                            |
| 177 | Ibanez MA, Baeza Monedero ME, Montalban PF. Gender differences in preoperative risk factors for delirium and postoperative outcomes in hip fracture surgery. <i>European Geriatric Medicine</i> . 2019; 10 (Supplement 1): S120. DOI: 10.1007/s41999-019-00221-0                                                                                                                                                                                         | Loss of quantitative data, the authors could not be contacted                                                               |
| 178 | Ishihara M, Matsuzaki A, Kinsui H. Postoperative Morbidity in Late-Stage Elders. <i>Urology</i> . 2009; 74(Suppl 4A): S324. DOI: 10.1016/j.urology.2009.07.100                                                                                                                                                                                                                                                                                           | No associations of interest: the study reports delirium and UTI/asymptomatic bacteriuria, but not in relation to each other |
| 179 | Ishizawa K, Usuki K, Ando K, Ueda Y, Kiguchi T, Uike N, Onishi Y, Iida H. Multicenter, Open-Label Phase I Clinical Study of Oral Rigosertib in Japanese Patients with Recurrent/Relapsed or Refractory Myelodysplastic Syndromes: Tolerability, Efficacy, and Pharmacokinetic Profiles. <i>Blood</i> [Conference Publication: 58th Annual Meeting of the American Society of Hematology, ASH]. 2016; 128(22): 5538. DOI: 10.1182/blood.V128.22.5538.5538 | No associations of interest: the study reports delirium and UTI/asymptomatic bacteriuria, but not in relation to each other |
| 180 | Ishizawa K, Usuki K, Ando K, Ueda Y, Kiguchi T, Uike N, Onishi Y, Iida H. A MULTICENTER, OPEN-LABEL, PHASE I CLINICAL STUDY: SAFETY, EFFICACY, AND PHARMACOKINETICS OF ORAL RIGOSERTIB IN JAPANESE PATIENTS WITH RECURENT/RELAPSED OR REFRACTORY MYELODYSPLASTIC SYNDROMES. <i>Haematologica</i> [Conference Publication: 22th Congress of the European Hematology Association. Spain]. 2017; 102(Suppl 2): 493. ISSN: 1592-8721                         | No associations of interest: the study reports delirium and UTI/asymptomatic bacteriuria, but not in relation to each other |
| 181 | Jia Y, Jin G, Guo S, Gu B, Jin Z, Gao X, Li Z. Fast-track surgery decreases the incidence of postoperative delirium and other complications in elderly patients with colorectal carcinoma. <i>Langenbeck's Archives of Surgery</i> . 2014; 399: 77-84. DOI: 10.1007/s00423-013-1151-9                                                                                                                                                                    | No associations of interest: the study reports delirium and UTI/asymptomatic bacteriuria, but not in relation to each other |
| 182 | Jimenez-Mola S, Calvo-Lobo C, Idoate-Gil J, Seco-Calvo J. Functionality, comorbidity, complication and surgery of hip fracture in older adults by age distribution. <i>Revista Da Associacao Medica Brasileira</i> . 2018; 64(5): 420-427. DOI: 10.1590/1806-9282.64.05.420                                                                                                                                                                              | No associations of interest: the study reports delirium and UTI/asymptomatic bacteriuria, but not in relation to each other |
| 183 | Jitsumura M, Heydari Khajehpour S, Lawrance RJ, Mallick I. SURGERY FOR PELVIC FLOOR DISORDER: ANALYSIS OVER TWO DECADES IN A UK COMMUNITY HOSPITAL. <i>Diseases of the Colon and</i>                                                                                                                                                                                                                                                                     | No associations of interest: the study reports delirium and UTI/asymptomatic bacteriuria, but not in relation to each other |

|     |                                                                                                                                                                                                                                                                                                                                                                                                                                                                                               |                                                                                                                                                       |
|-----|-----------------------------------------------------------------------------------------------------------------------------------------------------------------------------------------------------------------------------------------------------------------------------------------------------------------------------------------------------------------------------------------------------------------------------------------------------------------------------------------------|-------------------------------------------------------------------------------------------------------------------------------------------------------|
|     | Rectum. 2019; 62: e199-e200. DOI: 10.1097/DCR.0000000000001415                                                                                                                                                                                                                                                                                                                                                                                                                                |                                                                                                                                                       |
| 184 | Johnson JR. CONFUSION AND BACTERIURIA IN LONG-TERM CARE FACILITY RESIDENTS. <i>Journal of the American Geriatrics Society</i> . 2018; 66(6): 1235. DOI: 10.1111/jgs.15318                                                                                                                                                                                                                                                                                                                     | Not a primary study (review/comment)                                                                                                                  |
| 185 | Kalantar K, LaHue SC, DeRisi JL, Sample HA, Contag CA, Josephson SA, Wilson MR, Douglas VC. Whole-Genome mRNA Gene Expression Differs Between Patients With and Without Delirium. <i>Journal of Geriatric Psychiatry and Neurology</i> . 2018; 31(4): 203-210. DOI: 10.1177/0891988718785774                                                                                                                                                                                                  | Wrong age group                                                                                                                                       |
| 186 | Kamel HK. The Frequency and Factors Linked to a Urinary Tract Infection Coding in Patients Undergoing Hip Fracture Surgery. <i>Journal of the American Medical Directors Association</i> . 2005; 6(5): 316-320. DOI: 10.1016/j.jamda.2005.04.005                                                                                                                                                                                                                                              | Loss of quantitative data, the authors could not be contacted                                                                                         |
| 187 | Kamel HK, Iqbal MA, Mogallapu R, Maas D, Hoffmann RG. Time to Ambulation After Hip Fracture Surgery: Relation to Hospitalization Outcomes. <i>Journals of Gerontology Series A: Biological Sciences and Medical Sciences</i> . 2003; 58(11): 1042-1045. DOI: 10.1093/gerona/58.11.M1042                                                                                                                                                                                                       | No associations of interest: the study reports delirium and UTI/asymptomatic bacteriuria, but not in relation to each other                           |
| 188 | Kandel R, Bhattarai B, Dahal S. COGNITIVE STATUS AND THE OUTCOMES OF HIP FRACTURE SURGERY IN ELDERLY PATIENTS. <i>Alzheimer's and Dementia</i> . 2018; 14(7): P799-P800. DOI: 10.1016/j.jalz.2018.06.995                                                                                                                                                                                                                                                                                      | No associations of interest: the study reports delirium and UTI/asymptomatic bacteriuria, but not in relation to each other                           |
| 189 | Karki S, Kyomen H. ACUTE CONFUSIONAL STATES IN OLDER ADULTS WITH MAJOR NEUROCOGNITIVE DISORDER AND BACTERIURIA: IS ANTIBIOTIC TREATMENT WARRANTED? <i>The American Journal of Geriatric Psychiatry</i> . 2020; 28 (4 Supplement): S111-S112. DOI: 10.1016/j.jagp.2020.01.139                                                                                                                                                                                                                  | Case report/series                                                                                                                                    |
| 190 | Karlicic IS, Stasevic M, Jankovic S, Dejanovic SD, Milovanovic S. Markers of inflammation as risk predictors of lethal outcome in patients diagnosed with delirium. <i>Vojnosanitetski Pregled</i> . 2016; 73(9): 838-843. DOI: 10.2298/VSP141212012S                                                                                                                                                                                                                                         | Wrong age group                                                                                                                                       |
| 191 | Kasapovic A, Welle K, Jacobs C, Burger C, Kabir K. COMPLICATIONS AFTER POSTTRAUMATIC DORSAL CERVICAL SPINE FUSION. <i>European Spine Journal</i> . 2017; 26(2): S399. DOI: 10.1007/s00586-017-5225-1                                                                                                                                                                                                                                                                                          | No associations of interest: the study reports delirium and UTI/asymptomatic bacteriuria, but not in relation to each other                           |
| 192 | Kato CD, Nanteza A, Mugasa C, Edyelu A, Matovu E, Alibu VP. Clinical Profiles, Disease Outcome and Co-Morbidities among T.b. rhodesiense Sleeping Sickness Patients in Uganda. <i>PLoS ONE</i> . 2015; 10(2): e0118370. DOI: 10.1371/journal.pone.0118370                                                                                                                                                                                                                                     | No associations of interest: the study reports delirium and UTI/asymptomatic bacteriuria, but not in relation to each other                           |
| 193 | Katragadda L, Kantarjian HM, Garcia-Manero G, Kadia TM, Ferrajoli A, Jabbour EJ, Quintas-Cardama A, Konopleva M, Maniar M, Wilhelm F, Ravandi F, Cortes JE. Phase1/2 Single Arm Study of Rigosertib (ON 01910.Na) in Patients (pts) with Relapsed or Refractory Acute Leukemia or Transformed Myeloproliferative Neoplasms. <i>Blood [Conference Publication: 54th Annual Meeting of the American Society of Hematology, ASH]</i> . 2012; 120(21): 3606. DOI: 10.1182/blood.V120.21.3606.3606 | No associations of interest: the study reports delirium and UTI/asymptomatic bacteriuria, but not in relation to each other                           |
| 194 | Kelly A, Batke JN, Boyd M, Dvorak MF, Fisher CG, Kwon BK, Paquette SJ, Street J, Dea N. Prospective Analysis of Adverse Events in Surgical Treatment of Degenerative                                                                                                                                                                                                                                                                                                                          | Repetitive publication. The same data is provided in the article: Kelly AM, Batke JN, Dea N, Hartig DP, Fisher CG, Street JT. Prospective Analysis of |

|     |                                                                                                                                                                                                                                                                                                                                                                                                     |                                                                                                                                                                                                                                                                           |
|-----|-----------------------------------------------------------------------------------------------------------------------------------------------------------------------------------------------------------------------------------------------------------------------------------------------------------------------------------------------------------------------------------------------------|---------------------------------------------------------------------------------------------------------------------------------------------------------------------------------------------------------------------------------------------------------------------------|
|     | Spondylolisthesis. <i>The Spine Journal</i> . 2012; 12(9): 108S-109S. DOI: 10.1016/j.spinee.2012.08.296                                                                                                                                                                                                                                                                                             | Adverse Events in Surgical Treatment of Degenerative Spondylolisthesis. <i>The Spine Journal</i> . 2014; 14(12): 2905-2910. DOI: 10.1016/j.spinee.2014.04.016                                                                                                             |
| 195 | Kelly AM, Batke JN, Dea N, Hartig DP, Fisher CG, Street JT. Prospective Analysis of Adverse Events in Surgical Treatment of Degenerative Spondylolisthesis. <i>The Spine Journal</i> . 2014; 14(12): 2905-2910. DOI: 10.1016/j.spinee.2014.04.016                                                                                                                                                   | No associations of interest: the study reports delirium and UTI/asymptomatic bacteriuria, but not in relation to each other                                                                                                                                               |
| 196 | Kennedy M, Enander RA, Wolfe RE, Marcantonio ER, Shapiro NI. Identification of Delirium in Elderly Emergency Department Patients. <i>Academic Emergency Medicine</i> . 2012; 19(4, Suppl 1): S147. DOI: 10.1111/j.1553-2712.2012.01332.x                                                                                                                                                            | Loss of quantitative data, the authors could not be contacted                                                                                                                                                                                                             |
| 197 | Kennelly S, Briggs R, O'Neill D. Nursing Home Residents in the Emergency Department: A Cohort Study. <i>Irish Journal of Medical Science</i> . 2012; 181(Suppl 7): S230. DOI: 10.1007/s11845-012-0842-5                                                                                                                                                                                             | No associations of interest: the study reports delirium and UTI/asymptomatic bacteriuria, but not in relation to each other                                                                                                                                               |
| 198 | Kennelly S, Briggs R, O'Neill D. Emergency department attendances by nursing home residents. <i>European Geriatric Medicine</i> . 2012; 3: S30. DOI: 10.1016/j.eurger.2012.07.444                                                                                                                                                                                                                   | Repetitive publication. The same data is provided in the article: Kennelly S, Briggs R, O'Neill D. Nursing Home Residents in the Emergency Department: A Cohort Study. <i>Irish Journal of Medical Science</i> . 2012; 181(Suppl 7): S230. DOI: 10.1007/s11845-012-0842-5 |
| 199 | Kenny L, Nyawo B, Slight R, Barnard S, Stamenkovic S, Clark S, Forty J. Lung resections in octogenarians: 7 year experience in a single centre. <i>Lung Cancer</i> . 2012; 75: S63-S64. DOI: 10.1016/S0169-5002(12)70195-2                                                                                                                                                                          | No associations of interest: the study reports delirium and UTI/asymptomatic bacteriuria, but not in relation to each other                                                                                                                                               |
| 200 | Keyserling K, Beeber A, Sloane P. Is it really a UTI? How useful REALLY Are Clinical Signs in Older Persons? <i>Journal of the American Geriatrics Society</i> . 2014; 62: S267. DOI: 10.1111/jgs.12870                                                                                                                                                                                             | Not a primary study (review/comment)                                                                                                                                                                                                                                      |
| 201 | Khammassi N, Ben Mansour A, Abdelhedi H, Cherif O. Adverse effects of psychotropic drugs in the elderly: Retrospective study of 35 cases. [French]. <i>Annales Medico-Psychologiques</i> . 2012; 170(4): 251-255. DOI: 10.1016/j.amp.2011.11.012                                                                                                                                                    | No associations of interest: the study reports delirium and UTI/asymptomatic bacteriuria, but not in relation to each other                                                                                                                                               |
| 202 | Khasraghi FA, Lee EJ, Christmas C, Wenz JF. The Economic Impact of Medical Complications in Geriatric Patients With Hip Fracture. <i>Orthopedics</i> . 2003; 26(1): 49-53. PMID: 12555834                                                                                                                                                                                                           | No associations of interest: the study reports delirium and UTI/asymptomatic bacteriuria, but not in relation to each other                                                                                                                                               |
| 203 | Kim KI, Park KH, Koo KH, Han HS, Kim CH. Comprehensive geriatric assessment can predict postoperative morbidity and mortality in elderly patients undergoing elective surgery. <i>Archives of Gerontology and Geriatrics</i> . 2013; 56(3): 507-512. DOI: 10.1016/j.archger.2012.09.002                                                                                                             | No associations of interest: the study reports delirium and UTI/asymptomatic bacteriuria, but not in relation to each other                                                                                                                                               |
| 204 | Kirkova Y, Hwang YJ. DELIRIUM IN ELDERLY PATIENTS UNDERGOING CHEMOTHERAPY FOR SOLID CANCERS AND LYMPHOMA. Supportive Care in Cancer [Conference Publication: 2018 Joint Meeting of the Multinational Association of Supportive Care in Cancer, MASCC and the International Society of Oral Oncology, ISOO 2018. Austria]. 2018; 26(Suppl 2): S159. DOI: 0.26226/morressier.5afadd88f314ac000849af2c | No associations of interest: the study does not report UTI or asymptomatic bacteriuria                                                                                                                                                                                    |
| 205 | Klimiec E, Kowalska K, Pasinska P, Klimkowicz-Mrowiec A, Szyper A, Pera J, Slowik A, Dziedzic T. Pre-stroke apathy symptoms are associated with an increased risk of                                                                                                                                                                                                                                | Wrong age group                                                                                                                                                                                                                                                           |

|     |                                                                                                                                                                                                                                                                                                       |                                                                                                                             |
|-----|-------------------------------------------------------------------------------------------------------------------------------------------------------------------------------------------------------------------------------------------------------------------------------------------------------|-----------------------------------------------------------------------------------------------------------------------------|
|     | delirium in stroke patients. <i>Scientific Reports</i> . 2017; 7(1): 7658. DOI: 10.1038/s41598-017-08087-7                                                                                                                                                                                            |                                                                                                                             |
| 206 | Kreder HJ, Berry GK, McMurtry IA, Halman SI. Arthroplasty in the Octogenarian. <i>The Journal of Arthroplasty</i> . 2005; 20(3): 289-293. DOI: 10.1016/j.arth.2004.09.024                                                                                                                             | No associations of interest: the study reports delirium and UTI/asymptomatic bacteriuria, but not in relation to each other |
| 207 | Kunter U. Urinary tract infections in the elderly. [German]. <i>Der Nephrologe</i> . 2018; 13(5): 328-339. DOI: 10.1007/s11560-018-0249-z                                                                                                                                                             | Not a primary study (review/comment)                                                                                        |
| 208 | Kuswardhani RAT, Sugi YS. Factors Related to the Severity of Delirium in the Elderly Patients With Infection. <i>Gerontology and Geriatric Medicine</i> . 2017; 3: 1-5. DOI: 10.1177/2333721417739188                                                                                                 | No control group                                                                                                            |
| 209 | LaHue SC, Kalantar K, Wilson MR, DeRisi JL, Contag C, Josephson SA, Douglas VC. Whole Genome mRNA Gene Expression Differs Between Hospitalized Patients with and without Delirium. <i>Annals of Neurology</i> . 2017; 82(Suppl 21): S147-S148. DOI: 10.1002/ana.25024                                 | Wrong age group                                                                                                             |
| 210 | Lang SM. Treating Asymptomatic Bacteriuria (ABU) Promotes Inappropriate Antibiotic Usage which Increases <i>Clostridium Difficile</i> and Antimicrobial Resistance. <i>American Journal of Infection Control</i> . 2018; 46: S19-S20. DOI: 10.1016/j.ajic.2018.04.065                                 | No associations of interest: the study does not report delirium                                                             |
| 211 | Langhorne P, Stott DJ, Robertson L, MacDonald J, Jones L, McAlpine C, Dick F, Taylor GS, Murray G. Medical Complications After Stroke: A Multicenter Study. <i>Stroke</i> . 2000; 31(6): 1223-1229. DOI: 10.1161/01.str.31.6.1223                                                                     | No associations of interest: the study reports delirium and UTI/asymptomatic bacteriuria, but not in relation to each other |
| 212 | Langmore SE, Skarupski KA, Park PS, Fries BE. Predictors of Aspiration Pneumonia in Nursing Home Residents. <i>Dysphagia</i> . 2002; 17(4): 298-307. DOI: 10.1007/s00455-002-0072-5                                                                                                                   | No associations of interest: the study reports delirium and UTI/asymptomatic bacteriuria, but not in relation to each other |
| 213 | Lara LL, Troop PR, Beadleson-Baird M. The Risk of Urinary Tract Infection in Bowel Incontinent Men. <i>Journal of Gerontological Nursing</i> . 1990; 16(5): 24-26. DOI: 10.3928/0098-9134-19900501-07                                                                                                 | No associations of interest: the study does not report delirium                                                             |
| 214 | Lata C, Somayaji R, Holton DL. ANTIMICROBIAL PRESCRIBING PRACTICES IN THE TREATMENT OF SUSPECTED UTI IN THE ELDERLY IN THE EMERGENCY DEPARTMENT: A RETROSPECTIVE SINGLE CENTRE STUDY. <i>Canadian Journal of Infectious Diseases and Medical Microbiology</i> . 2015; 26(2): e38-e39. ISSN: 1918-1493 | No associations of interest: the study reports delirium and UTI/asymptomatic bacteriuria, but not in relation to each other |
| 215 | Lau HL, Patel S, Garg N. Causes and Predictors of 30-Day Readmission in Elderly Patients with Delirium. <i>Neurology [Conference Publication: 71st Annual Meeting of the American Academy of Neurology, AAN]</i> . 2019; 92(15). ISBN: 1526-632X                                                      | No associations of interest: the study does not report UTI or asymptomatic bacteriuria                                      |
| 216 | Lean K, Nawaz RF, Jawad S, Vincent C. Reducing urinary tract infections in care homes by improving hydration. <i>BMJ Open Quality</i> . 2019; 8(3): e000563. DOI: 10.1136/bmjoq-2018-000563                                                                                                           | No associations of interest: the study does not report delirium                                                             |
| 217 | Leao J, Bhatt NR, O'Connell N, Powell J, Giri SK. A review of urosepsis over a ten-year period within the Department of Urology at University Hospital Limerick. <i>Irish Journal of Medical Science</i> . 2017; 186(Suppl 3): S143. DOI: 10.1007/s11845-017-1578-z                                   | No associations of interest: the study does not report UTI or asymptomatic bacteriuria                                      |
| 218 | Lee EA, Malatt C. Making the Hospital Safer for Older Adult Patients: A Focus on the Indwelling Urinary Catheter. <i>The Permanente Journal</i> . 2011; 15(1): 49-52. DOI: 10.7812/tpp/10-067                                                                                                         | Not a primary study (review/comment)                                                                                        |

|     |                                                                                                                                                                                                                                                                                                                                                     |                                                                                                                             |
|-----|-----------------------------------------------------------------------------------------------------------------------------------------------------------------------------------------------------------------------------------------------------------------------------------------------------------------------------------------------------|-----------------------------------------------------------------------------------------------------------------------------|
| 219 | Lee JD, Erickson JC, Short MW, Roth BJ. Education Research: Evaluating acute altered mental status: Are incoming interns prepared? <i>Neurology</i> . 2008; 71(18): e50-e53. DOI: 10.1212/01.wnl.0000327880.58055.7a                                                                                                                                | No associations of interest: the study reports neither delirium nor UTI/asymptomatic bacteriuria                            |
| 220 | Lee MJ, Sayers AE, Drake TM, Singh P, Bradburn M, Wilson TR, Muruganathan A, Walsh CJ, Fearnhead NS. Malnutrition, nutritional interventions and clinical outcomes of patients with acute small bowel obstruction: results from a national, multicentre, prospective audit. <i>BMJ Open</i> . 2019; 9(7): e029235. DOI: 10.1136/bmjopen-2019-029235 | No associations of interest: the study reports delirium and UTI/asymptomatic bacteriuria, but not in relation to each other |
| 221 | Legault C, Vieira L, Cote R. Medical complication and outcome of ischemic stroke patients in relation to length of stay in emergency department. <i>International Journal of Stroke</i> . 2015; 10(Suppl 4): 51. DOI: 10.1111/ij.s.12633-2                                                                                                          | No associations of interest: the study reports delirium and UTI/asymptomatic bacteriuria, but not in relation to each other |
| 222 | Legault C, Chen BY, Vieira L, Lo B, Wadup L, Cote R. Delays in the emergency department for stroke patients, medical complications and predictors of outcomes: the McGill experience. <i>The Canadian Journal of Neurological Sciences</i> . 2016; 43(Suppl 2): S36. DOI: 10.1017/cjn.2016.168                                                      | No associations of interest: the study does not report UTI or asymptomatic bacteriuria                                      |
| 223 | LeGrand SB. Delirium in Palliative Medicine: A Review. <i>Journal of Pain and Symptom Management</i> . 2012; 44(4): 583-594. DOI: 10.1016/j.jpainsymman.2011.10.013                                                                                                                                                                                 | Not a primary study (review/comment)                                                                                        |
| 224 | Lemoine L, Dupont C, Capron A, Cerf E, Yilmaz M, Verloop D, Blanckaert K, Senneville E, Alfandari S. Prospective evaluation of the management of urinary tract infections in 134 French nursing homes. <i>Medecine et Maladies Infectieuses</i> . 2018; 48(5): 359-364. DOI: 10.1016/j.medmal.2018.04.387                                           | No control group                                                                                                            |
| 225 | Lepetitcorps H, Pociumban M, Bouksani-Kacher Z, Pautas E, Belmin J, Bastuji-Garin S, Lafuente-Lafuente C. Precipitating factors for delirium in community-dwelling elderly individuals: a prospective case series. <i>European Geriatric Medicine</i> . 2017; 8(Suppl 1): S90. ISSN: 1878-7649                                                      | Case report/series                                                                                                          |
| 226 | Lerner AJ, Hedera P, Koss E, Stuckey J, Friedland RP. Delirium in Alzheimer Disease. <i>Alzheimer Disease and Associated Disorders</i> . 1997; 11(1): 16-20. DOI: 10.1097/00002093-199703000-00004                                                                                                                                                  | Loss of quantitative data (number of patients with UTI in the control group), the authors could not be contacted            |
| 227 | Leung A, Fong C, Mack C, Ting C, Franklyn K, Gudjuhar A. Utility of an Ortho-Geriatric Service: Hip Fracture Patient Outcomes Across Three Melbourne Metropolitan Hospitals. <i>Internal Medicine Journal</i> . 2010; 40(Suppl 1): 131. DOI: 10.1111/j.1445-5994.2010.02187.x                                                                       | No associations of interest: the study reports delirium and UTI/asymptomatic bacteriuria, but not in relation to each other |
| 228 | Levkoff SE, Safran C, Cleary PD, Gallop J, Phillips RS. Identification of Factors Associated with the Diagnosis of Delirium in Elderly Hospitalized Patients. <i>Journal of the American Geriatrics Society</i> . 1988; 36(12): 1099-1104. DOI: 10.1111/j.1532-5415.1988.tb04396.x                                                                  | Wrong age group                                                                                                             |
| 229 | Levy CR, Eilertsen T, Kramer AM, Hutt E. Which Clinical Indicators and Resident Characteristics Are Associated With Health Care Practitioner Nursing Home Visits or Hospital Transfer for Urinary Tract Infections? <i>Journal of the American Medical Directors Association</i> . 2006; 7(8): 493-498. DOI: 10.1016/j.jamda.2006.03.001            | No associations of interest: the study reports delirium and UTI/asymptomatic bacteriuria, but not in relation to each other |
| 230 | Levy CR, Alemi F, Williams AE, Williams AR, Wojtusiak J, Sutton B, Giang P, Pracht E, Argyros L. Shared Homes as an Alternative to Nursing Home Care: Impact of VA's Medical Foster Home Program on Hospitalization. <i>The Gerontologist</i> . 2016; 56(1): 62-71. DOI: 10.1093/geront/gnv092                                                      | No associations of interest: the study reports delirium and UTI/asymptomatic bacteriuria, but not in relation to each other |



|     |                                                                                                                                                                                                                                                                                                                                                             |                                                                                                                                                                                                                                                                                                                                                     |
|-----|-------------------------------------------------------------------------------------------------------------------------------------------------------------------------------------------------------------------------------------------------------------------------------------------------------------------------------------------------------------|-----------------------------------------------------------------------------------------------------------------------------------------------------------------------------------------------------------------------------------------------------------------------------------------------------------------------------------------------------|
| 231 | Li HC, Taylor M. ADVANCED AGE AND THE PRESENTATION OF FRAILTY, RATHER THAN SINGLE SYSTEM DIAGNOSES, ARE THE MAIN PREDICTORS OF INPATIENT LENGTH OF STAY: A RETROSPECTIVE LINEAR MULTIPLE REGRESSION ANALYSIS OF 23,151 ADMISSION EPISODES. <i>Age and Ageing</i> . 2019; 48: i32. DOI: 10.1093/ageing/afy204.10                                             | No associations of interest: the study reports delirium and UTI/asymptomatic bacteriuria, but not in relation to each other                                                                                                                                                                                                                         |
| 232 | Li JY, Yap R, Ge J, Liew S, Lo ZJ, Froilan E, Selvaganapathi N, Chan M, Narayanan S, Chandrasekar S, Tan GWL. Effectiveness of perioperative geriatric consultation for Vascular in-patient population. <i>Journal of the American Geriatrics Society</i> . 2017; 65: S69. ISSN: 0002-8614                                                                  | No associations of interest: the study reports delirium and UTI/asymptomatic bacteriuria, but not in relation to each other                                                                                                                                                                                                                         |
| 233 | Liao H, Teresi J, Inouye S, Boockvar K. One-year Outcomes of an Adapted Hospital Elder Life Program to Prevent Delirium in Long-term Care. <i>Journal of the American Geriatrics Society</i> . 2016; 64: S17-S18. DOI: 10.1111/jgs.14231                                                                                                                    | No associations of interest: the study reports delirium and UTI/asymptomatic bacteriuria, but not in relation to each other                                                                                                                                                                                                                         |
| 234 | Lim PN, Ooi LJ, Ong T, Neighbour C, Sahota O. PELVIC FRACTURES IN OLDER PEOPLE ADMITTED TO HOSPITAL: THE CLINICAL BURDEN. <i>Age and Ageing</i> . 2018; 47: iii9-iii12. DOI: 10.1093/ageing/afy124.02                                                                                                                                                       | No associations of interest: the study reports delirium and UTI/asymptomatic bacteriuria, but not in relation to each other                                                                                                                                                                                                                         |
| 235 | Lima M, Mondadori L, Chibana A, Gilio D, Giroud E, Michard F. Upscaling hemodynamic and brain monitoring during major cancer surgery: a before-after comparison study. <i>Critical Care [Conference Publication: 38th International Symposium on Intensive Care and Emergency Medicine, ISICEM]</i> . 2018; 22(Suppl 1): 82. DOI: 10.1186/s13054-018-1973-5 | No associations of interest: the study reports delirium and UTI/asymptomatic bacteriuria, but not in relation to each other                                                                                                                                                                                                                         |
| 236 | Lima MF, Mondadori LA, Chibana AY, Gilio DB, Giroud Joaquim EH, Michard F. Outcome impact of hemodynamic and depth of anesthesia monitoring during major cancer surgery: a before-after study. <i>Journal of Clinical Monitoring and Computing</i> . 2019; 33(3): 365-371. DOI: 10.1007/s10877-018-0190-8                                                   | No associations of interest: the study reports delirium and UTI/asymptomatic bacteriuria, but not in relation to each other                                                                                                                                                                                                                         |
| 237 | Lin RY, Heacock LC, Bhargava GA, Fogel JF. Clinical associations of delirium in hospitalized adult patients and the role of on admission presentation. <i>International Journal of Geriatric Psychiatry</i> . 2010; 25(10): 1022-1029. DOI: 10.1002/gps.2500                                                                                                | Wrong age group                                                                                                                                                                                                                                                                                                                                     |
| 238 | Lin RY, Heacock LC, Fogel JF. Drug-Induced, Dementia-Associated and Non-Dementia, Non-Drug Delirium Hospitalizations in the United States, 1998-2005: An Analysis of the National Inpatient Sample. <i>Drugs and Aging</i> . 2010; 27(1): 51-61. DOI: 10.2165/11531060-000000000-00000                                                                      | Wrong age group                                                                                                                                                                                                                                                                                                                                     |
| 239 | Ling XW, Howe TS, Bee Koh JS, Wong MK, Meng Ng AC. Preoperative thyroid dysfunction predicts 30-day postoperative complications in elderly HIP fracture patients treated surgically. <i>Endocrine Reviews [Conference Publication: 94th Annual Meeting and Expo of the Endocrine Society, ENDO]</i> . 2012; 33(3). ISSN 0163-769X                           | Repetitive publication. The same data is provided in the article: Ling XW, Howe TS, Bee Koh JS, Wong MK, Meng Ng AC. Preoperative Thyroid Dysfunction Predicts 30-Day Postoperative Complications in Elderly Patients With Hip Fracture. <i>Geriatric Orthopaedic Surgery and Rehabilitation</i> . 2013; 4(2): 43-49. DOI: 10.1177/2151458513504215 |
| 240 | Ling XW, Howe TS, Bee Koh JS, Wong MK, Meng Ng AC. Preoperative Thyroid Dysfunction Predicts 30-Day Postoperative Complications in Elderly Patients With Hip Fracture. <i>Geriatric Orthopaedic Surgery and Rehabilitation</i> . 2013; 4(2): 43-49. DOI: 10.1177/2151458513504215                                                                           | No associations of interest: the study reports delirium and UTI/asymptomatic bacteriuria, but not in relation to each other                                                                                                                                                                                                                         |

|     |                                                                                                                                                                                                                                                                                                                                                            |                                                                                                                                                                                                                                                                                                                      |
|-----|------------------------------------------------------------------------------------------------------------------------------------------------------------------------------------------------------------------------------------------------------------------------------------------------------------------------------------------------------------|----------------------------------------------------------------------------------------------------------------------------------------------------------------------------------------------------------------------------------------------------------------------------------------------------------------------|
| 241 | Lisk C, Mani S, Bertfield D, Ritchie A, Webber A. Hospital admission avoidance; data from 1392 patients referred to the rapid response service. <i>European Geriatric Medicine</i> . 2015; 6(Suppl 1): S38. DOI: 10.1016/S1878-7649(15)30128-5                                                                                                             | No associations of interest: the study reports delirium and UTI/asymptomatic bacteriuria, but not in relation to each other                                                                                                                                                                                          |
| 242 | Liu J, Jang M, Mary-Ann H, Buxbaum L, Makineni R, Schwab E, Kinoshian B. HOSPITAL IN HOME PATIENTS SUFFER FEWER PATIENT SAFETY EVENTS THAN COMPARABLE HOSPITAL INPATIENTS. <i>Journal of General Internal Medicine</i> . 2016; 31(2): S245. ISSN: 1525-1497                                                                                                | No associations of interest: the study reports neither delirium nor UTI/asymptomatic bacteriuria                                                                                                                                                                                                                     |
| 243 | Liu X, Liu Y, Pan S, Cao H, Yu D. Does integrity of the lesser trochanter influence the surgical outcome of intertrochanteric fracture in elderly patients? <i>BMC Musculoskeletal Disorders</i> . 2015; 16(1): 47. DOI: 10.1186/s12891-015-0492-7                                                                                                         | No associations of interest: the study reports delirium and UTI/asymptomatic bacteriuria, but not in relation to each other                                                                                                                                                                                          |
| 244 | Lixouriotis C, Peritogiannis V. Delirium in the primary care setting. <i>Psychiatry and Clinical Neurosciences</i> . 2011; 65(1): 102-104. DOI: 10.1111/j.1440-1819.2010.02165.x                                                                                                                                                                           | Case report/series                                                                                                                                                                                                                                                                                                   |
| 245 | Lopes MA, Maia E, Lima A, Martins T, Silva K, Zanella I, Steglich M, Stoppe JA, Neto YC. Prevalence of dementia in elderly inpatients: Investigation of associated clinical conditions. <i>Alzheimer's and Dementia</i> . 2014; 10: P682. DOI: 10.1016/j.jalz.2014.05.1236                                                                                 | No associations of interest: the study reports delirium and UTI/asymptomatic bacteriuria, but not in relation to each other                                                                                                                                                                                          |
| 246 | Lopez S, Sibilano A, Stefanoni MG, Gazzardi G, Balconi R, Guaita A. Clinical complexity and clinical instability among the nursing home residents. [Italian]. <i>Giornale di Gerontologia</i> . 2009; 57: 23-32. ISSN: 0017-0305                                                                                                                           | No associations of interest: the study does not report UTI or asymptomatic bacteriuria                                                                                                                                                                                                                               |
| 247 | Lubomski M, Rushworth RL, Tisch S. Hospitalisation and comorbidities in Parkinson's disease: A large Australian retrospective study. <i>Movement Disorders</i> . 2014; 29(Suppl 1): S545. DOI: 10.1002/mds.25914                                                                                                                                           | Repetitive publication. The same data is provided in the article: Lubomski M, Rushworth R, Tisch S. Hospitalisation and comorbidities in Parkinson's disease: a large Australian retrospective study. <i>Journal of Neurology, Neurosurgery and Psychiatry</i> . 2015; 86(3): 324-330. DOI: 10.1136/jnnp-2014-307822 |
| 248 | Lubomski M, Rushworth R, Tisch S. Hospitalisation and comorbidities in Parkinson's disease: a large Australian retrospective study. <i>Journal of Neurology, Neurosurgery and Psychiatry</i> . 2015; 86(3): 324-330. DOI: 10.1136/jnnp-2014-307822                                                                                                         | No associations of interest: the study reports delirium and UTI/asymptomatic bacteriuria, but not in relation to each other                                                                                                                                                                                          |
| 249 | Lundstrom M, Olofsson B, Stenvall M, Karlsson S, Nyberg L, Englund U, Borssen B, Svensson O, Gustafson Y. Postoperative delirium in old patients with femoral neck fracture: a randomized intervention study. <i>Aging Clinical and Experimental Research</i> . 2007; 19(3): 178-186. DOI: 10.1007/BF03324687                                              | No associations of interest: the study reports delirium and UTI/asymptomatic bacteriuria, but not in relation to each other                                                                                                                                                                                          |
| 250 | MacDonald SL, Robinson LR. The Incidence of Physiatry-Relevant Complications in Trauma Patients Admitted to an Urban Canadian Trauma Center. <i>American Journal of Physical Medicine and Rehabilitation</i> . 2019; 98(2): 165-168. DOI: 10.1097/PHM.0000000000001021                                                                                     | No associations of interest: the study reports delirium and UTI/asymptomatic bacteriuria, but not in relation to each other                                                                                                                                                                                          |
| 251 | MacLennon WJ. Urinary tract infections in older patients. <i>Reviews in Clinical Gerontology</i> . 2003; 13(2): 119-127. DOI: 10.1017/S0959259803013236                                                                                                                                                                                                    | Not a primary study (review/comment)                                                                                                                                                                                                                                                                                 |
| 252 | Magny E, Le Petitcorps H, Pociumban M, Bouksani-Kacher Z, Pautas E, Belmin J, Bastuji-Garin S, Lafuente-Lafuente C. Predisposing and precipitating factors for delirium in community-dwelling older adults admitted to hospital with this condition: A prospective case series. <i>PLoS ONE</i> . 2018; 13(2): e0193034. DOI: 10.1371/journal.pone.0193034 | Case report/series                                                                                                                                                                                                                                                                                                   |

|     |                                                                                                                                                                                                                                                                                                                                                                                                                                                                                                                          |                                                                                                                                                 |
|-----|--------------------------------------------------------------------------------------------------------------------------------------------------------------------------------------------------------------------------------------------------------------------------------------------------------------------------------------------------------------------------------------------------------------------------------------------------------------------------------------------------------------------------|-------------------------------------------------------------------------------------------------------------------------------------------------|
| 253 | Manappallil RG. Delirium in Parkinson's Disease: A Cocktail Diagnosis. <i>Journal of Clinical and Diagnostic Research</i> . 2016; 10(12): OD15-OD16. DOI: 10.7860/JCDR/2016/22248.9089                                                                                                                                                                                                                                                                                                                                   | Case report/series                                                                                                                              |
| 254 | Manepalli J, Grossberg GT, Mueller C. Prevalence of Delirium and Urinary Tract Infection in a Psychogeriatric Unit. <i>Journal of Geriatric Psychiatry and Neurology</i> . 1990; 3(4): 198-202. DOI: 10.1177/089198879000300404                                                                                                                                                                                                                                                                                          | No associations of interest: wrong condition (patients with urinary tract infection and asymptomatic bacteriuria are put together in one group) |
| 255 | Mansutti I, Saiani L, Palese A. Delirium in patients with ischaemic and haemorrhagic stroke: findings from a scoping review. <i>European Journal of Cardiovascular Nursing</i> . 2019; 18(6): 435-448. DOI: 10.1177/1474515119846226                                                                                                                                                                                                                                                                                     | Not a primary study (review/comment)                                                                                                            |
| 256 | Marcantonio ER. Can you explain how a urinary tract infection in an older patient can sometimes precipitate delirium? <i>Annals of Long-Term Care</i> . 2002; 10(1): 56. ISSN: 1524-7929                                                                                                                                                                                                                                                                                                                                 | Not a primary study (review/comment)                                                                                                            |
| 257 | Marengoni A, Calabrese AP, Cossi S. Hospital admissions for acute onset of behavioral symptoms in demented patients: what do they want to say? <i>International Psychogeriatrics</i> . 2004; 16(4): 491-493. DOI: 10.1017/s1041610204230915                                                                                                                                                                                                                                                                              | No associations of interest: the study reports delirium and UTI/asymptomatic bacteriuria, but not in relation to each other                     |
| 258 | Marion TE, Rivers CS, Kurban D, Cheng CL, Fallah N, Batke J, Dvorak MF, Fisher CG, Kwon BK, Noonan VK, Street JT. Previously Identified Common Post-Injury Adverse Events in Traumatic Spinal Cord Injury - Validation of Existing Literature and Relation to Selected Potentially Modifiable Comorbidities: A Prospective Canadian Cohort Study. <i>Journal of Neurotrauma</i> . 2017; 34(20): 2883-2891. DOI: 10.1089/neu.2016.4933                                                                                    | No associations of interest: the study reports delirium and UTI/asymptomatic bacteriuria, but not in relation to each other                     |
| 259 | Marques Alvarez L, Rodriguez Garcia R, Villota Ferreiro L, Perez Belmonte L, Escudero Augusto D, Cofino Castaneda LA, Yano Escudero R, Alvarez Garcia L, Palomo Antequera C, Martinez Revuelta M, Garcia Arias B. Complications and mortality in severe trauma inpatient after intensive care unit discharge. <i>Intensive Care Medicine Experimental [Conference Publication: 30th Annual Congress of the European Society of Intensive Care Medicine, ESICM]</i> . 2017; 5(2): 247-248. DOI: 10.1186/s40635-017-0151-4 | No associations of interest: the study reports delirium and UTI/asymptomatic bacteriuria, but not in relation to each other                     |
| 260 | Marthinsen AE, Olsen LH, Dahl M, Svendsen T, Ranhoff AH. Characteristics and trajectories of patients admitted to an acute geriatric unit and the development of care pathways. <i>European Geriatric Medicine</i> . 2011; 2: S133. DOI: 10.1016/j.eurger.2011.06.002                                                                                                                                                                                                                                                    | No associations of interest: the study reports delirium and UTI/asymptomatic bacteriuria, but not in relation to each other                     |
| 261 | Martin Aspas A, Benitez Macias JF, Benitez Rodriguez E, Segura Fernandez E, Mogollo Galvan A. Relation of precipitating factors and mortality in agitated delirium of Palliative Care patients. [Spanish]. <i>Medicina Paliativa</i> . 2005; 12(3): 147-151. ISSN: 1134-248X                                                                                                                                                                                                                                             | No associations of interest: the study does not report UTI or asymptomatic bacteriuria                                                          |
| 262 | Martinez L, Heflin MT. Hazards of Hospitalization: A Novel Geriatrics Curriculum for Internal Medicine Interns. <i>Journal of the American Geriatrics Society</i> . 2012; 60: S210. DOI: 10.1111/j.1532-5415.2012.04000.x                                                                                                                                                                                                                                                                                                | No associations of interest: the study reports neither delirium nor UTI/asymptomatic bacteriuria                                                |
| 263 | Mas MA, Gamez S, Delgado V, Gonzalez-Ares JA. Management of delirium at home in older patients early discharged for a hospital-at-home intervention (HaH). <i>European Geriatric Medicine</i> . 2012; 3: S138-S139. DOI: 10.1016/j.eurger.2012.07.350                                                                                                                                                                                                                                                                    | No associations of interest: the study does not report UTI or asymptomatic bacteriuria                                                          |
| 264 | Maskoen TT, Adiwinata R, Oktaliansah E. The incidence and risk factors of delirium in patients who admitted to the ICU of Dr. Hasan Sadikin Hospital Bandung Indonesia. <i>Intensive Care Medicine Experimental [Conference</i>                                                                                                                                                                                                                                                                                          | No associations of interest: the study does not report UTI or asymptomatic bacteriuria                                                          |

|     |                                                                                                                                                                                                                                                                                 |                                                                                                                             |
|-----|---------------------------------------------------------------------------------------------------------------------------------------------------------------------------------------------------------------------------------------------------------------------------------|-----------------------------------------------------------------------------------------------------------------------------|
|     | Publication: 30th Annual Congress of the European Society of Intensive Care Medicine, ESICM]. 2017; 5(Suppl 2): 176. DOI: 10.1186/s40635-017-0151-4                                                                                                                             |                                                                                                                             |
| 265 | Mattar I, Chan MF, Childs C. Factors causing acute delirium in critically ill adult patients: a systematic review. JBI Library of Systematic Reviews. 2012; 10(3): 187-231. DOI: 10.11124/jbisrir-2012-3                                                                        | Not a primary study (review/comment)                                                                                        |
| 266 | Matthews SJ, Lancaster JW. Urinary Tract Infections in the Elderly Population. The American Journal of Geriatric Pharmacotherapy. 2011; 9(5): 286-309. DOI: 10.1016/j.amjopharm.2011.07.002                                                                                     | Not a primary study (review/comment)                                                                                        |
| 267 | Mayne DJF, Nicholas J, Fraser K, Ager S, Medhi M, Jaafar A. BACTERIURIA AND DELIRIUM. Age and Ageing. 2012; 41(Suppl 2): ii81. DOI: 10.1093/ageing/afs112                                                                                                                       | No control group                                                                                                            |
| 268 | Mayne S, Bowden A, Sundvall P-D, Gunnarsson R. The scientific evidence for a potential link between confusion and urinary tract infection in the elderly is still confusing - a systematic literature review. BMC Geriatrics. 2019; 19(1): 1-15. DOI: 10.1186/s12877-019-1049-7 | Not a primary study (review/comment)                                                                                        |
| 269 | Mayne S, Sundvall PD, Gunnarsson R. Confusion Strongly Associated with Antibiotic Prescribing Due to Suspected Urinary Tract Infections in Nursing Homes. Journal of the American Geriatrics Society. 2018; 66(2): 274-281. DOI: 10.1111/jgs.15179                              | Loss of quantitative data, the authors were contacted but did not provide the necessary data.                               |
| 270 | Mazzone A, Torelli F, Mazzola P, Blanco S, Bellelli G, Grasso M, Annoni G. THE USE OF INDWELLING URINARY CATHETER IN ELDERLY PEOPLE: RESULTS FROM A SURVEY IN AN ACUTE GERIATRIC WARD. Neurourology and Urodynamics. 2013; 32(Suppl 1): S34-S35. DOI: 10.1002/nau.22424         | No associations of interest: the study does not report UTI or asymptomatic bacteriuria                                      |
| 271 | McClellan P, Tunney M, Gilpin D, Parsons C, Hughes C. Antimicrobial prescribing in residential homes. Journal of Antimicrobial Chemotherapy. 2012; 67(7): 1781-1790. DOI: 10.1093/jac/dks085                                                                                    | No associations of interest: the study does not report delirium                                                             |
| 272 | McClure CL. Common Infections in the Elderly. American Family Physician. 1992; 45(6): 2691-2598. PMID: 1595517                                                                                                                                                                  | Not a primary study (review/comment)                                                                                        |
| 273 | McKee N, Hayes E. An Audit of Antibiotic Prescription for Older Patients Admitted to Hospital with Urinary Tract Infection. Irish Journal of Medical Science. 2013; 182(Suppl 6): S264. DOI: 10.1007/s11845-013-0985-z                                                          | No associations of interest: the study reports delirium and UTI/asymptomatic bacteriuria, but not in relation to each other |
| 274 | McKenzie R, Stewart MT, Bellantoni MF, Finucane TE. Bacteriuria in Individuals Who Become Delirious. The American Journal of Medicine. 2014; 127(4): 255-257. DOI: 10.1016/j.amjmed.2013.10.016                                                                                 | Not a primary study (review/comment)                                                                                        |
| 275 | McKenzie R, Finucane TE. The Reply. The American Journal of Medicine. 2014; 127(10): E17. DOI: 10.1016/j.amjmed.2014.06.023                                                                                                                                                     | Not a primary study (review/comment)                                                                                        |
| 276 | McNulty C. Managing asymptomatic bacteriuria in the elderly. Practice Nursing. 2014; 25(1): 11-15. DOI: 10.12968/pnur.2014.25.1.11                                                                                                                                              | Not a primary study (review/comment)                                                                                        |
| 277 | Merchant RA, Lui KL, Ismail NH, Wong HP, Sitoh YY. The Relationship between Postoperative Complications and Outcomes after Hip Fracture Surgery. Annals of the Academy of Medicine, Singapore. 2005; 34(2): 163-168. PMID: 15827663                                             | No associations of interest: the study reports delirium and UTI/asymptomatic bacteriuria, but not in relation to each other |
| 278 | Michael A, Obiechina N, Hussain Z, Waites M. Perioperative complications and hip fracture mortality. European Geriatric Medicine. 2017; 8: S231. ISSN: 1878-7649                                                                                                                | No associations of interest: the study reports delirium and UTI/asymptomatic bacteriuria, but not in relation to each other |
| 279 | Mikhail Mustafa S, Harte GI, Maher C. THE UTILITY OF THE AUSTRALIAN PELVIC FLOOR QUESTIONNAIRE                                                                                                                                                                                  | No associations of interest: the study does not report delirium                                                             |

|     |                                                                                                                                                                                                                                                                                                                                                 |                                                                                                                             |
|-----|-------------------------------------------------------------------------------------------------------------------------------------------------------------------------------------------------------------------------------------------------------------------------------------------------------------------------------------------------|-----------------------------------------------------------------------------------------------------------------------------|
|     | AS AN ASSESSMENT TOOL FOR URINARY INCONTINENCE AND PROLAPSE. Female Pelvic Medicine and Reconstructive Surgery. 2019; 25(5): S246-S247. DOI: 10.1097/SPV.0000000000000766                                                                                                                                                                       |                                                                                                                             |
| 280 | Miller J. To treat or not to treat: managing bacteriuria in elderly people. Canadian Medical Association Journal. 2001; 164(5): 619-620. PMID: 11258205                                                                                                                                                                                         | Not a primary study (review/comment)                                                                                        |
| 281 | Miller MM, Mahta A, Mayasi Y, Yakhkind A, Dakay KB, Azher I, Hannoun A, Barton B, Wendell LC, Carandang RA. The Safety and Utility of Steroids in Aneurysmal Subarachnoid Hemorrhage. Stroke [Conference Publication: International Stroke Conference 2019, Honolulu, Hawaii, USA]. 2019; 50: Abstract TP551. DOI: 10.1161/str.50.suppl_1.TP551 | No associations of interest: the study reports delirium and UTI/asymptomatic bacteriuria, but not in relation to each other |
| 282 | Mittal C, Lee HCD, Goh KS, Lau CKA, Tay L, Siau C, Loh YH, Goh TKE, Sandi CL, Lee CE. ValuedCare program: a population health model for the delivery of evidence-based care across care continuum for hip fracture patients in Eastern Singapore. Journal of Orthopaedic Surgery and Research. 2018; 13(1): 129. DOI: 10.1186/s13018-018-0819-9 | No associations of interest: the study reports delirium and UTI/asymptomatic bacteriuria, but not in relation to each other |
| 283 | Moreigne B, Dudognon P, Berthouin M, Labrousse A, Sauvage P, Salle JY, Munoz M, Labrousse C. Urinary incontinence in the elderly in a middle stay geriatric unit. Epidemiological survey and results of micturitional rehabilitation. [French]. Annales de Readaptation et de Medecine Physique. 1994; 37(8): 437-442. ISSN: 0168-6054          | No associations of interest: the study reports delirium and UTI/asymptomatic bacteriuria, but not in relation to each other |
| 284 | Moreno G, Bissig D, Simpkins T, Duffy A, Kennedy J. Development of an Algorithm for Treatment of Altered Mental Status in the Emergency Department. Neurology [Conference Publication: 69th American Academy of Neurology Annual Meeting, AAN]. 2017; 88(16). ISSN: 1526-632X                                                                   | No associations of interest: the study reports delirium and UTI/asymptomatic bacteriuria, but not in relation to each other |
| 285 | Mukherjee K, Burruss SK, Brooks SE, May AK. Managing Infectious Disease in the Critically Ill Elderly Patient. Current Geriatrics Reports. 2019; 8(3): 180-193. DOI: 10.1007/s13670-019-00291-9                                                                                                                                                 | Not a primary study (review/comment)                                                                                        |
| 286 | Mullen JO, Mullen NL. Hip Fracture Mortality: A Prospective, Multifactorial Study to Predict and Minimize Death Risk. Clinical Orthopaedics and Related Research. 1992; (280): 214-222. PMID: 1611747                                                                                                                                           | Wrong age group                                                                                                             |
| 287 | Murphy DP, Cleveland M. Urinary Tract Infections in Elderly Patients: How Best to Diagnose and Treat. Consultant. 2004; 44(12): 1502-1506. ISSN: 0010-7069                                                                                                                                                                                      | Case report/series                                                                                                          |
| 288 | Nace DA, Drinka PJ, Crnich CJ. Clinical Uncertainties in the Approach to Long Term Care Residents With Possible Urinary Tract Infection. Journal of the American Medical Directors Association. 2014; 15(2): 133-139. DOI: 10.1016/j.jamda.2013.11.009                                                                                          | Not a primary study (review/comment)                                                                                        |
| 289 | Nasim A, Debra KM, Dhakam Z. Diuretics increase Morbidity in Elderly Patients. Journal of the American Geriatrics Society. 2011; 59: S31. DOI: 10.1111/j.1532-5415.2011.03416.x                                                                                                                                                                 | No associations of interest: the study reports delirium and UTI/asymptomatic bacteriuria, but not in relation to each other |
| 290 | Nayar S, Xavier K, Braude P. POSTOPERATIVE DELIRIUM FOLLOWING CARDIOTHORACIC SURGERY: A NURSING PERSPECTIVE. Age and Ageing. 2019; 48: i21-i22. DOI: 10.1093/ageing/afy198.05                                                                                                                                                                   | No associations of interest: the study reports neither delirium nor UTI/asymptomatic bacteriuria                            |
| 291 | Nelson JM, Good E. Urinary tract infections and asymptomatic bacteriuria in older adults. The Nurse                                                                                                                                                                                                                                             | Not a primary study (review/comment)                                                                                        |

|     |                                                                                                                                                                                                                                                                                                                                                                                |                                                                                                                             |
|-----|--------------------------------------------------------------------------------------------------------------------------------------------------------------------------------------------------------------------------------------------------------------------------------------------------------------------------------------------------------------------------------|-----------------------------------------------------------------------------------------------------------------------------|
|     | Practitioner. 2015; 40(8): 43-48. DOI: 10.1097/01.NPR.0000460855.44987.c1                                                                                                                                                                                                                                                                                                      |                                                                                                                             |
| 292 | Newman DK, Strauss R. Preventing Catheter-Associated Urinary Tract Infections. <i>UroToday International Journal</i> . 2013; 6(5). DOI: 10.3834/uij.1944-5784.2013.10.11                                                                                                                                                                                                       | Not a primary study (review/comment)                                                                                        |
| 293 | Newman JM, Sodhi N, Dalton SE, Khlopas A, Newman RP, Higuera CA, Mont MA. Does Parkinson's Disease Increase the Risk of Perioperative Complications After Total Hip Arthroplasty? A Nationwide Database Study. <i>The Journal of Arthroplasty</i> . 2018; 33(7): S162-S166. DOI: 10.1016/j.arth.2018.01.006                                                                    | No associations of interest: the study reports delirium and UTI/asymptomatic bacteriuria, but not in relation to each other |
| 294 | Nguyen PV-Q, Pelletier L, Payot I, Latour J. The Delirium Drug Scale is associated to delirium incidence in the emergency department. <i>International Psychogeriatrics</i> . 2018; 30(4): 503-510. DOI: 10.1017/S1041610217002538                                                                                                                                             | No associations of interest: the study does not report UTI or asymptomatic bacteriuria                                      |
| 295 | Nicolle LE, Henderson E, Bjornson J, McIntyre M, Harding GKM, MacDonell JA. The Association of Bacteriuria with Resident Characteristics and Survival in Elderly Institutionalized Men. <i>Annals of Internal Medicine</i> . 1987; 106(5): 682-686. DOI: 10.7326/0003-4819-106-5-682                                                                                           | No associations of interest: the study does not report delirium (there is only a category of "confused or demented")        |
| 296 | Niemeyer-Guimaraes M, Cendoroglo MS, Mello-Almada C. FUNCTIONAL CAPACITY OF OLDER ADULTS UNDERGOING CORONARY ARTERY BYPASS GRAFT SURGERY: A 6 MONTHS FOLLOW-UP. <i>Journal of General Internal Medicine</i> . 2013; 28: S80. DOI: 10.1007/s11606-013-2436-y                                                                                                                    | No associations of interest: the study reports delirium and UTI/asymptomatic bacteriuria, but not in relation to each other |
| 297 | Nijmeijer WS, Folbert EC, Vermeer M, Vollenbroek-Hutten MMR, Hegeman JH. The consistency of care for older patients with a hip fracture: are the results of the integrated orthogeriatric treatment model of the Centre of Geriatric Traumatology consistent 10 years after implementation? <i>Archives of Osteoporosis</i> . 2018; 13(1): 131. DOI: 10.1007/s11657-018-0550-5 | No associations of interest: the study reports delirium and UTI/asymptomatic bacteriuria, but not in relation to each other |
| 298 | Ninan S. Don't assume urinary tract infection is the cause of delirium in older adults. <i>British Medical Journal</i> . 2013; 346: f3005. DOI: 10.1136/bmj.f3005                                                                                                                                                                                                              | Not a primary study (review/comment)                                                                                        |
| 299 | Ninan S, Walton C, Barlow G. Investigation of suspected urinary tract infection in older people. <i>British Medical Journal</i> . 2014; 349: g4070. DOI: 10.1136/bmj.g4070                                                                                                                                                                                                     | Case report/series                                                                                                          |
| 300 | Ocampo Chaparro JM, Leon Giraldo H, Reyes-Ortiz CA. Factors associated with hypoalbuminemia among hospitalized elderly in a geriatrics unit. <i>Journal of the American Geriatrics Society</i> . 2016; 64: S53. DOI: 10.1111/jgs.14231                                                                                                                                         | No associations of interest: the study reports delirium and UTI/asymptomatic bacteriuria, but not in relation to each other |
| 301 | Ochs M. Surgical Management of the Hip in the Elderly Patient. <i>Clinics in Geriatric Medicine</i> . 1990; 6(3): 571-587. DOI: 10.1016/s0749-0690(18)30605-0                                                                                                                                                                                                                  | Not a primary study (review/comment)                                                                                        |
| 302 | O'Donnell AJ, Walsh T, Weinberg L, Tang A. The Impact of the Hospital Elder Life Program on Diagnosis and Treatment of Presumed Urinary Tract Infections. <i>Journal of the American Geriatrics Society</i> . 2018; 66: S108. DOI: 10.1111/jgs.15376                                                                                                                           | No associations of interest: the study does not report delirium                                                             |
| 303 | O'Donnell AJ, Walsh TL, Tang A, Weinberg L. The impact of the Hospital Elder Life Program on the treatment of asymptomatic bacteriuria: An unexpected benefit. <i>Geriatric Nursing</i> . 2019; 40(5): 473-477. DOI: 10.1016/j.gerinurse.2019.03.011                                                                                                                           | No associations of interest: the study does not report delirium                                                             |
| 304 | Oichi T, Oshima Y, Matsui H, Fushimi K, Tanaka S, Yasunaga H. Can Elective Spine Surgery Be Performed Safely Among Nonagenarians? Analysis of a National                                                                                                                                                                                                                       | No associations of interest: the study reports delirium and UTI/asymptomatic bacteriuria, but not in relation to each other |

|     |                                                                                                                                                                                                                                                                                                                                                                                                                                                                 |                                                                                                                             |
|-----|-----------------------------------------------------------------------------------------------------------------------------------------------------------------------------------------------------------------------------------------------------------------------------------------------------------------------------------------------------------------------------------------------------------------------------------------------------------------|-----------------------------------------------------------------------------------------------------------------------------|
|     | Inpatient Database in Japan. <i>Spine</i> . 2019; 44(5): E273-E281. DOI: 10.1097/BRS.0000000000002842                                                                                                                                                                                                                                                                                                                                                           |                                                                                                                             |
| 305 | Ojeda J, Gallego E, Esparrago I, Herrera M. Choosing wisely: perhaps general anesthesia is not the safest option for hip fracture elderly patients. <i>Journal of the American Geriatrics Society</i> . 2018; 66: S311. DOI: 10.1111/jgs.15376                                                                                                                                                                                                                  | No associations of interest: the study reports delirium and UTI/asymptomatic bacteriuria, but not in relation to each other |
| 306 | Ola BA, Crabb J, Krishnadas R, Erinfolami AR, Olagunju A. Incidence and correlates of delirium in a West African mental health clinic. <i>General Hospital Psychiatry</i> . 2010; 32(2): 176-181. DOI: 10.1016/j.genhosppsych.2009.10.005                                                                                                                                                                                                                       | No associations of interest: the study does not report UTI or asymptomatic bacteriuria                                      |
| 307 | Olofsson B. Old people with femoral neck fracture: delirium, malnutrition and surgical methods - an intervention program. Dissertation, Umeå University. 2007. ISBN: 978-91-7264-286-7                                                                                                                                                                                                                                                                          | No associations of interest: the study reports delirium and UTI/asymptomatic bacteriuria, but not in relation to each other |
| 308 | Paletta NJ, Wang AK, Miller BJ. Recurrent urinary tract infections in psychotic mood disorders. <i>Schizophrenia Research</i> . 2017; 184: 137-138. DOI: 10.1016/j.schres.2016.11.035                                                                                                                                                                                                                                                                           | No associations of interest: the study does not report delirium                                                             |
| 309 | Pasinska P, Kowalska K, Klimiec E, Szyper-Maciejowska A, Wilk A, Klimkowicz-Mrowiec A. Frequency and predictors of post-stroke delirium in PROspective Observational POLish Study (PROPOLIS). <i>Journal of Neurology</i> . 2018; 265(4): 863-870. DOI: 10.1007/s00415-018-8782-2                                                                                                                                                                               | Wrong age group (non-delirious group)                                                                                       |
| 310 | Pedersen SJ, Borgbjerg FM, Schousboe B, Pedersen BD, Jorgensen HL, Duus BR, Lauritzen JB. A Comprehensive Hip Fracture Program Reduces Complication Rates and Mortality. <i>Journal of the American Geriatrics Society</i> . 2008; 56(10): 1831-1838. DOI: 10.1111/j.1532-5415.2008.01945.x                                                                                                                                                                     | No associations of interest: the study reports delirium and UTI/asymptomatic bacteriuria, but not in relation to each other |
| 311 | Perez ED. HIP FRACTURE: PHYSICIANS TAKE MORE ACTIVE ROLE IN PATIENT CARE. <i>Geriatrics</i> . 1994; 49(4): 31-37. PMID: 8163213                                                                                                                                                                                                                                                                                                                                 | Not a primary study (review/comment)                                                                                        |
| 312 | Petrino R, Tua A, Salvi F. Urinary Tract Infections in Older Patients. <i>Geriatric Emergency Medicine</i> . 2017; 16: 235-246. DOI: 10.1007/978-3-319-19318-2_16                                                                                                                                                                                                                                                                                               | Not a primary study (review/comment)                                                                                        |
| 313 | Pfandlsteiner T, Greiner B, Wimmer C. Dorsoventral Spinal Fusion with Instrumentation and decompression in degenerative instability vs. Dorsal Instrumentation with decompression combined with posterolateral Fusion in the lumbar spine in old patients. Open vs MIS access. <i>European Spine Journal</i> . 2012; 21(11): 2363. DOI: 10.1007/s00586-012-2522-6                                                                                               | No associations of interest: the study reports delirium and UTI/asymptomatic bacteriuria, but not in relation to each other |
| 314 | Pinnell R, Joo P. Emergency department practice patterns of UTI investigation among the delirious elderly: a retrospective chart review. <i>Canadian Journal of Emergency Medicine</i> [Conference Publication: Canadian Association of Emergency Physicians (CAEP/ACMU) Conference, June 1-4, 2020, Ontario, Canada]. 2020; 22(s1): S81. DOI: 10.1017/cem.2020.253                                                                                             | No control group                                                                                                            |
| 315 | Plaha P, Chari A, Haslam N, Pereira E, Rogers A, Korevaar T, Karavitaki N, Grossman A, Cudlip S. Pituitary Tumor Surgery in the Elderly: Perioperative Complications and Long-Term Outcome. <i>Journal of Neurological Surgery, Part B: Skull Base</i> [Conference Publication: 6th International Congress World Federation of Skull Base Societies and 10th European Skull Base Society Congress Sussex United Kingdom]. 2012; 73. DOI: 10.1055/s-0032-1314047 | No associations of interest: the study reports delirium and UTI/asymptomatic bacteriuria, but not in relation to each other |
| 316 | Plaza-Carmona M, Requena-Hernandez C, Jimenez-Mola S. Predictors of Delirium in Octogenarian Patients Hospitalized for a Hip Fracture. <i>International Journal of</i>                                                                                                                                                                                                                                                                                          | Loss of quantitative data, the authors were contacted but did not provide the necessary data.                               |

|     |                                                                                                                                                                                                                                                                                                                                                                                                                                                                                                  |                                                                                                                             |
|-----|--------------------------------------------------------------------------------------------------------------------------------------------------------------------------------------------------------------------------------------------------------------------------------------------------------------------------------------------------------------------------------------------------------------------------------------------------------------------------------------------------|-----------------------------------------------------------------------------------------------------------------------------|
|     | Environmental Research and Public Health. 2020; 17(20): 1-10. DOI: 10.3390/ijerph17207467                                                                                                                                                                                                                                                                                                                                                                                                        |                                                                                                                             |
| 317 | Radinovic K, Markovic-Denic L, Dubljanin-Raspopovic E, Marinkovic J, Milan Z, Bumbasirevic V. Estimating the effect of incident delirium on short-term outcomes in aged hip fracture patients through propensity score analysis. <i>Geriatrics and Gerontology International</i> . 2015; 15(7): 848-855. DOI: 10.1111/ggi.12358                                                                                                                                                                  | Loss of quantitative data, the authors could not be contacted                                                               |
| 318 | Rahayu RA, Boedhi-Darmojo R. Incidence and cause of acute confusion in elderly patients. <i>Medical Journal of Indonesia</i> . 2002; 11(1): 30-35. DOI: 10.13181/mji.v11i1.47                                                                                                                                                                                                                                                                                                                    | No control group                                                                                                            |
| 319 | Ramadan H, Patterson C, Maguire S, Melvin I, Kain K, Teale E, Forster A. STROKE COMPLICATIONS AT BRADFORD ROYAL INFIRMARY, BRADFORD, UK. <i>European Stroke Journal</i> . 2016; 1(1 supplement): 124-125. DOI: 10.1177/2396987316642909                                                                                                                                                                                                                                                          | No associations of interest: the study reports delirium and UTI/asymptomatic bacteriuria, but not in relation to each other |
| 320 | Ramaswamy A, Bahuva R, Alraies C, Rajamanickam A, Harte B. Review of Predictors and Negative Outcomes Associated with Patients Who Exceed Their Expected Length of Stay. <i>Journal of Hospital Medicine</i> . 2010; 5(Suppl 1): 63-64. DOI: 10.1002/jhm.705                                                                                                                                                                                                                                     | No associations of interest: the study reports delirium and UTI/asymptomatic bacteriuria, but not in relation to each other |
| 321 | Rampersaud RY, Lin C, Chrysostoum CV. Looking Beyond the Clinical Box: The Health Services Impact of Surgical Adverse Events. <i>The Spine Journal</i> . 2012; 12(9): 86S-87S. DOI: 10.1016/j.spinee.2012.08.242                                                                                                                                                                                                                                                                                 | No associations of interest: the study reports delirium and UTI/asymptomatic bacteriuria, but not in relation to each other |
| 322 | Rampersaud RY, Sarro AM, Magtoto R, Neary MA, Massicotte EM, Lewis SJ, Fehlings MG. Risk Factors for the Development of Adverse Events in Spinal Surgery: A Prospective Study of 1,815 Patients. <i>The Spine Journal</i> . 2012; 12(9): 95S. DOI: 10.1016/j.spinee.2012.08.263                                                                                                                                                                                                                  | No associations of interest: the study reports delirium and UTI/asymptomatic bacteriuria, but not in relation to each other |
| 323 | Ranhoff AH, Holvik K, Martinsen MI, Domaas K, Solheim LF. Older hip fracture patients: three groups with different needs. <i>BMC Geriatrics</i> . 2010; 10(1): 65. DOI: 10.1186/1471-2318-10-65                                                                                                                                                                                                                                                                                                  | No associations of interest: the study reports delirium and UTI/asymptomatic bacteriuria, but not in relation to each other |
| 324 | Rao A, Suliman A, Vuik S, Aylin P, Darzi A. Outcomes of dementia: Systematic review and meta-analysis of hospital administrative database studies. <i>Archives of Gerontology and Geriatrics</i> . 2016; 66: 198-204. DOI: 10.1016/j.archger.2016.06.008                                                                                                                                                                                                                                         | Not a primary study (review/comment)                                                                                        |
| 325 | Rodriguez Sanjuan MDP, Arroyo C, Grantham SJ, Sanguino Caso J. Benefits of admittance to a functional recovery unit for elderly patients. <i>European Geriatric Medicine</i> . 2011; 2S: S44-S45. DOI: 10.1016/j.eurger.2011.06.002                                                                                                                                                                                                                                                              | No associations of interest: the study reports delirium and UTI/asymptomatic bacteriuria, but not in relation to each other |
| 326 | Rosa R, Tonietto T, Ascoli A, Madeira L, Rutzen W, Falavigna M, Robinson C, Salluh J, Cavalcanti A, Azevedo L, Cremonese R, Da Silva D, Dornelles A, Skrobik Y, Teles J, Ribeiro T, Eugênio C, Teixeira C. Effectiveness and safety of an extended visitation policy in the ICU: a before and after study. <i>Critical Care [Conference Publication: 37th International Symposium on Intensive Care and Emergency Medicine. Belgium]</i> . 2017; 21(Suppl 1): 53. DOI: 10.1186/s13054-017-1630-4 | No associations of interest: the study reports delirium and UTI/asymptomatic bacteriuria, but not in relation to each other |
| 327 | Rose JW, Engel GL. DELIRIUM IN THE ELDERLY PATIENT. <i>The New England Journal of Medicine</i> . 1989; 321(4): 264. DOI: 10.1056/NEJM198907273210418                                                                                                                                                                                                                                                                                                                                             | Not a primary study (review/comment)                                                                                        |
| 328 | Rothberg MB, Herzig SJ, Pekow PS, Avrunin J, Lagu T, Lindenauer PK. Association Between Sedating Medications and Delirium in Older Inpatients. <i>Journal of the American Geriatrics Society</i> . 2013; 61(6): 923-930. DOI: 10.1111/jgs.12253                                                                                                                                                                                                                                                  | Wrong control group (matched controls)                                                                                      |



|     |                                                                                                                                                                                                                                                                                                                                  |                                                                                                                                                    |
|-----|----------------------------------------------------------------------------------------------------------------------------------------------------------------------------------------------------------------------------------------------------------------------------------------------------------------------------------|----------------------------------------------------------------------------------------------------------------------------------------------------|
| 329 | Roubaud-Baudron C, Gavazzi G. Bacteremia in the elderly population. [French]. Les Cahiers de L'annee Gerontologique. 2014; 6(3): 102-106. DOI: 10.1007/s12612-014-0404-8                                                                                                                                                         | Not a primary study (review/comment)                                                                                                               |
| 330 | Sabartes Fortuny O, Sanchez Rodriguez D, Pi-Figueras Valls M, Abadia Escartin A, Gutierrez Cebollada J, SabateGarcia RA. Let us be proactive! Evolution and tendencies of clinical assistance in a subacute care geriatric unit. European Geriatric Medicine. 2011; 2S: S55. DOI: 10.1016/j.eurger.2011.06.002                   | No associations of interest: the study reports delirium and UTI/asymptomatic bacteriuria, but not in relation to each other                        |
| 331 | Sabzwari S, Kumar D, Bhanji S, Sheerani M, Azhar G. Proportion, Predictors and Outcomes of Delirium at a Tertiary care Hospital in Karachi, Pakistan. Ageing International. 2014; 39(1): 33-45. DOI: 10.1007/s12126-012-9152-5                                                                                                   | No associations of interest: wrong diagnostic process (the method of establishing a diagnosis of delirium does not meet the protocol requirements) |
| 332 | Sanchez-Castellano C, Perez-Abascal N, Torremocha-Garcia R, Montero-Erassquin B, Mateos-Nozal J, Cruz-Jentoft AJ. Predictors of culture positive urinary tract infection in the emergency department. European Geriatric Medicine. 2012; 3S: S76. DOI: 10.1016/j.eurger.2012.07.146                                              | No associations of interest: the study does not report delirium                                                                                    |
| 333 | Saritas T. Acute Renal Failure, Confusion and Petechiae after an Infection in Egypt. [German]. Der Nephrologe. 2013; 8(5): 423-425. DOI: 10.1007/s11560-012-0715-y                                                                                                                                                               | Case report/series                                                                                                                                 |
| 334 | Satue JA, Belinchon JC, Perez Martin A, Marrero J, Luaces M, Zapatero A. Clinical profile, comorbidities and prognosis in a spanish cohort of elderly patients with acute decompensated heart failure. European Journal of Heart Failure Supplements. 2011; 10: S24-S25. DOI: 10.1093/eurjhf/hsr003                              | No associations of interest: the study does not report UTI or asymptomatic bacteriuria                                                             |
| 335 | Savani C, Kumar V, Singh T, Yi X, Pathak A, Chib A, Renati S. Delirium is Associated With Increased Readmissions and Mortality in Patients With Acute Ischemic Stroke. Stroke [Conference Publication: International Stroke Conference 2019, Honolulu, Hawaii, USA]. 2019; 50: Abstract TP358. DOI: 10.1161/str.50.suppl_1.TP358 | No associations of interest: the study does not report UTI or asymptomatic bacteriuria                                                             |
| 336 | Schneidinger CS, Umek W, Bohmdorfer B. The Problem of Polypharmacy in Female Patients with Overactive Bladders - Cross-Sectional Study in a Specialist Outpatient Department. Geburtshilfe Und Frauenheilkunde. 2016; 76(12): 1318-1324. DOI: 10.1055/s-0042-114221                                                              | Case report/series                                                                                                                                 |
| 337 | Scholz C, Klingler JH, Scheiwe C, Naseri Y, Masalha W, Hubbe U. Atlantoaxial Instability in Patients Older Than 70 Years: What Is the Outcome When Further Conservative Treatment Is Not an Option? Journal of Neurological Surgery, Part A: Central European Neurosurgery. 2018; 79(5): 372-379. DOI: 10.1055/s-0038-1646958    | No associations of interest: the study reports delirium and UTI/asymptomatic bacteriuria, but not in relation to each other                        |
| 338 | Schor JD, Levkoff SE, Lipsitz LA, Reilly CH, Cleary PD, Rowe JW, Evans DA. Risk Factors for Delirium in Hospitalized Elderly. JAMA: The Journal of the American Medical Association. 1992; 267(6): 827-831. DOI: 10.1001/jama.1992.03480060073033                                                                                | No associations of interest: the study does not report UTI or asymptomatic bacteriuria                                                             |
| 339 | Sever R, Gold A, Segal O, Regev G, Keynan O, Salai M, Justo D. Admission Norton scale scores (ANSS) are associated with post-operative complications following spine fracture surgery in the elderly. Archives of Gerontology and Geriatrics. 2012; 55(1): 177-180. DOI: 10.1016/j.archger.2011.08.007                           | No associations of interest: the study reports delirium and UTI/asymptomatic bacteriuria, but not in relation to each other                        |
| 340 | Shacham N, Lerman Y, Justo D. Low Norton scale scores are associated with medical complications other than                                                                                                                                                                                                                       | No associations of interest: the study reports delirium and UTI/asymptomatic                                                                       |

|     |                                                                                                                                                                                                                                                                                                                                                                                                        |                                                                                                                             |
|-----|--------------------------------------------------------------------------------------------------------------------------------------------------------------------------------------------------------------------------------------------------------------------------------------------------------------------------------------------------------------------------------------------------------|-----------------------------------------------------------------------------------------------------------------------------|
|     | pressure ulcers during rehabilitation in the elderly. <i>European Geriatric Medicine</i> . 2013; 4(2): 91-94. DOI: 10.1016/j.eurger.2012.11.001                                                                                                                                                                                                                                                        | bacteriuria, but not in relation to each other                                                                              |
| 341 | Shah CA, Lampert R. Incidence and Burden of "Missed Primary Prevention ICDs" Among Out-of-Hospital Cardiac Arrests. <i>Circulation [Conference Publication: American Heart Association]</i> . 2013; 128(Suppl 22): Abstract 14173. ISSN: 0009-7322                                                                                                                                                     | No associations of interest: the study reports delirium and UTI/asymptomatic bacteriuria, but not in relation to each other |
| 342 | Shahid K, Alamri Y, Scowcroft H, Dixon L, Creighton J, Isenman H, Metcalf S, Chambers S. Urinalysis orders and yield among General Medicine patients: a single-centre's experience in New Zealand. <i>The New Zealand Medical Journal</i> . 2019; 132(1488): 21-27. PMID: 31851658                                                                                                                     | No associations of interest: the study reports delirium and UTI/asymptomatic bacteriuria, but not in relation to each other |
| 343 | Shi B, Wang J, Yang H, Zhang DW, Liu G, Wang T, Ye N. Emergency operation for the treatment of intertrochanteric fractures in elderly patients. [Chinese]. <i>China journal of orthopaedics and traumatology</i> . 2013; 26(5): 408-411. PMID: 23937035                                                                                                                                                | No associations of interest: the study reports delirium and UTI/asymptomatic bacteriuria, but not in relation to each other |
| 344 | Shin WC, Do MU, Woo SH, Choi SH, Moon NH, Suh KT. C-reactive protein for early detection of postoperative systemic infections in intertrochanteric femoral fractures. <i>Injury</i> . 2018; 49(10): 1859-1864. DOI: 10.1016/j.injury.2018.07.029                                                                                                                                                       | Loss of quantitative data, the authors could not be contacted                                                               |
| 345 | Siddarth KV, Surya P, Saif D, Gupta A. MEDICAL AND SURGICAL COMPLICATIONS IN HIP FRACTURE PATIENTS SUPPORTS NEED FOR COLLABORATIVE HIP UNIT. <i>Osteoporosis International</i> . 2014; 25(Suppl 6): S724-S725. DOI: 10.1007/s00198-014-2893-0                                                                                                                                                          | No associations of interest: the study reports delirium and UTI/asymptomatic bacteriuria, but not in relation to each other |
| 346 | Silver SA, Baillie L, Simor AE. Positive urine cultures: A major cause of inappropriate antimicrobial use in hospitals? <i>Canadian Journal of Infectious Diseases and Medical Microbiology</i> . 2009; 20(4): 107-111. DOI: 10.1155/2009/702545                                                                                                                                                       | Wrong age group                                                                                                             |
| 347 | Sircar K, Knoop F, Wingen C, Westermann L, Eysel P, Scheyerer MJ. Postoperative delirium in spine surgery - Incidence and risk factors in geriatric patients. <i>European Spine Journal [Conference Publication: 13th German Spine Congress Annual Meeting of the German Spine Society, Germany]</i> . 2018; 27(11): 2927. DOI: 10.1007/s00586-018-5770-2                                              | No associations of interest: the study does not report UTI or asymptomatic bacteriuria                                      |
| 348 | Smith TO, Cooper A, Peryer G, Griffiths R, Fox C, Cross J. Factors predicting incidence of post-operative delirium in older people following hip fracture surgery: a systematic review and meta-analysis. <i>International Journal of Geriatric Psychiatry</i> . 2017; 32(4): 386-396. DOI: 10.1002/gps.4655                                                                                           | Not a primary study (review/comment)                                                                                        |
| 349 | Sobesky J, Madai VI, Wiedmann S, Bauer M, Wellwood I, Malsch C, Hausler KG, Schmitz B, Mackert BM, Koennecke HC, Nabavi DG, Kleinschnitz C, Dichgans M, Endres M, Dirnagl U, Heuschmann PU. EARLY COMPLICATIONS AFTER ISCHEMIC STROKE AND STROKE OUTCOME: FIRST RESULTS FROM THE STROKEUNIT PLUS STUDY. <i>European Stroke Journal</i> . 2016; 1(1 supplement): 379-380. DOI: 10.1177/2396987316642909 | No associations of interest: the study reports delirium and UTI/asymptomatic bacteriuria, but not in relation to each other |
| 350 | Sorbye LW, Grue EV. Hip fracture and urinary incontinence - use of indwelling catheter postsurgery. <i>Scandinavian Journal of Caring Sciences</i> . 2013; 27(3): 632-642. DOI: 10.1111/j.1471-6712.2012.01075.x                                                                                                                                                                                       | No associations of interest: the study reports delirium and UTI/asymptomatic bacteriuria, but not in relation to each other |
| 351 | Soroceanu A, Burton DC, Oren JH, Smith JS, Hostin R, Shaffrey CI, Akbarnia BA, Ames CP, Errico TJ, Bess S, Gupta MC, Deviren V, Schwab FJ, Lafage V. Medical                                                                                                                                                                                                                                           | No associations of interest: the study reports delirium and UTI/asymptomatic                                                |

|     |                                                                                                                                                                                                                                                                                                                                                                                 |                                                                                                                             |
|-----|---------------------------------------------------------------------------------------------------------------------------------------------------------------------------------------------------------------------------------------------------------------------------------------------------------------------------------------------------------------------------------|-----------------------------------------------------------------------------------------------------------------------------|
|     | Complications after Adult Spinal Deformity Surgery: Incidence, Risk factors, and Clinical Impact. <i>Spine</i> . 2016; 41(22): 1718-1723. DOI: 10.1097/BRS.0000000000001636                                                                                                                                                                                                     | bacteriuria, but not in relation to each other                                                                              |
| 352 | Srinivas S, Fisher C, Boyd M, Paquette S, Kwon B, Ailon T, Morin RC, Dvorak M, Street J, Dea N. Adverse Events Profile in EN Bloc Resection and Surgery for Primary Bone Tumor. <i>Global Spine Journal</i> . 2018; 8(1 suppl): 150S-151S. DOI: 10.1177/2192568218771030                                                                                                        | No associations of interest: the study does not report delirium                                                             |
| 353 | St Bernard R, Chodirker L, Masih-Khan E, Jiang H, Franke N, Kukreti V, Tiedemann R, Trudel S, Reece D, Chen C. Efficacy, toxicity and mortality of autologous SCT in multiple myeloma patients with dialysis-dependent renal failure. <i>Bone Marrow Transplantation</i> . 2014; 50(1): 95-99. DOI: 10.1038/bmt.2014.226                                                        | No associations of interest: the study does not report UTI or asymptomatic bacteriuria                                      |
| 354 | Stenvall M, Berggren M, Lundstrom M, Gustafson Y, Olofsson B. A multidisciplinary intervention program improved the outcome after hip fracture for people with dementia-Subgroup analyses of a randomized controlled trial. <i>Archives of Gerontology and Geriatrics</i> . 2012; 54(3): e284-e289. DOI: 10.1016/j.archger.2011.08.013                                          | No associations of interest: the study reports delirium and UTI/asymptomatic bacteriuria, but not in relation to each other |
| 355 | Street JT, Noonan VK, Cheung A, Fisher CG, Dvorak MF. Incidence of acute care adverse events and long-term health-related quality of life in patients with TSCI. <i>The Spine Journal</i> . 2015; 15(5): 923-932. DOI: 10.1016/j.spinee.2013.06.051                                                                                                                             | No associations of interest: the study reports delirium and UTI/asymptomatic bacteriuria, but not in relation to each other |
| 356 | Su YJ, Lai YC, Liao CJ. Hazardous factors besides infection in hypoglycemia. <i>Biomedical Reports</i> . 2017; 6(4): 480-484. DOI: 10.3892/br.2017.872                                                                                                                                                                                                                          | No associations of interest: the study does not report delirium                                                             |
| 357 | Sugimura Y, Sipahi NF, Mehdiani A, Petrov G, Awe M, Minol JP, Boeken U, Korbmacher B, Lichtenberg A, Dalyanoglu H. Risk and Consequences of Postoperative Delirium in Cardiac Surgery. <i>The Thoracic and Cardiovascular Surgeon</i> . 2020; 68(5): 416-423. DOI: 10.1055/s-0040-1708046                                                                                       | Wrong age group                                                                                                             |
| 358 | Suleman A, Krakovsky J, Joo P. Treatment of asymptomatic bacteriuria in elderly patients with delirium: a systematic review. <i>Canadian Journal of Emergency Medicine</i> . 2018; 20(Suppl 1): S11-S12. DOI: 10.1017/cem.2018.77                                                                                                                                               | Not a primary study (review/comment)                                                                                        |
| 359 | Sundvall PD, Elm M, Ulleryd P, Molstad S, Rodhe N, Jonsson L, Andersson B, Hahn-Zoric M, Gunnarsson R. Interleukin-6 concentrations in the urine and dipstick analyses were related to bacteriuria but not symptoms in the elderly: a cross sectional study of 421 nursing home residents. <i>BMC geriatrics</i> . 2014; 14: 88. DOI: 10.1186/1471-2318-14-88                   | No associations of interest: the study does not report UTI or asymptomatic bacteriuria                                      |
| 360 | Sundvall PD, Ulleryd P, Gunnarsson RK. Urine culture doubtful in determining etiology of diffuse symptoms among elderly individuals: a cross-sectional study of 32 nursing homes. <i>BMC Family Practice</i> . 2011; 12: 36. DOI: 10.1186/1471-2296-12-36                                                                                                                       | No associations of interest: the study does not report UTI or asymptomatic bacteriuria                                      |
| 361 | Svab J. Surgery in the Elderly. [Czech]. <i>Rozhledy v chirurgii: měsíčník Československé chirurgické společnosti</i> . 2005; 84(11): 552-556. PMID: 16334936                                                                                                                                                                                                                   | Not a primary study (review/comment)                                                                                        |
| 362 | Tabbi L, Tonelli R, Fantini R, Castaniere I, Bruzzi G, Nani C, Caffarri L, Sacchi M, Spacone A, Dongilli R, Boni E, Falsini L, Ribuffo V, Marchioni A, Clini E. INCIDENCE AND PREDICTORS OF DELIRIUM IN PATIENTS WITH ACUTE RESPIRATORY FAILURE UNDERGOING NON-INVASIVE MECHANICAL VENTILATION. <i>Chest</i> . 2020; 157 (6 Supplement): A410. DOI: 10.1016/j.chest.2020.05.460 | No associations of interest: the study does not report UTI or asymptomatic bacteriuria                                      |

|     |                                                                                                                                                                                                                                                                                                                                                              |                                                                                                                                                 |
|-----|--------------------------------------------------------------------------------------------------------------------------------------------------------------------------------------------------------------------------------------------------------------------------------------------------------------------------------------------------------------|-------------------------------------------------------------------------------------------------------------------------------------------------|
| 363 | Takeuchi D, Koide N, Suzuki A, Ishizone S, Shimizu F, Tsuchiya T, Kumeda S, Miyagawa S. Postoperative complications in elderly patients with gastric cancer. <i>Journal of Surgical Research</i> . 2015; 198(2): 317-326. DOI: 10.1016/j.jss.2015.03.095                                                                                                     | No associations of interest: the study reports delirium and UTI/asymptomatic bacteriuria, but not in relation to each other                     |
| 364 | Tasar PT, Sahin S, Akcam NO, Dinckal C, Ulusoy MG, Sarikaya OF, Duman S, Akcicek F, Noyan A. Delirium is associated with increased mortality in the geriatric population. <i>International Journal of Psychiatry in Clinical Practice</i> . 2018; 22(3): 200-205. DOI: 10.1080/13651501.2017.1406955                                                         | No associations of interest: the study does not report UTI or asymptomatic bacteriuria                                                          |
| 365 | Thayabaran D, Hindley E, Schiff R. TRIAL WITHOUT CATHETER: THE ROLE OF BLADDER FILLING PRIOR TO REMOVAL OF URETHRAL CATHETERS. A SYSTEMATIC REVIEW OF RANDOMISED CONTROLLED TRIALS. <i>Age and Ageing</i> . 2019; 48: i32. DOI: 10.1093/ageing/afy204.08                                                                                                     | Not a primary study (review/comment)                                                                                                            |
| 366 | Tifuh Amba K. Delirium in the Elderly Adult in Critical Care. <i>Critical Care Nursing Clinics of North America</i> . 2014; 26(1): 139-145. DOI: 10.1016/j.ccell.2013.10.008                                                                                                                                                                                 | Not a primary study (review/comment)                                                                                                            |
| 367 | Tingstrom P, Milberg A, Sund-Levander M. Early nonspecific signs and symptoms of infection in institutionalized elderly persons: perceptions of nursing assistants. <i>Scandinavian Journal of Caring Sciences</i> . 2010; 24(1): 24-31. DOI: 10.1111/j.1471-6712.2008.00680.x                                                                               | No associations of interest: the study reports neither delirium nor UTI/asymptomatic bacteriuria                                                |
| 368 | Tsang LF, Yeung CH, Tse CC, Lam KB, Cheung LP, Chu KK, Tsang CK, Wong CK, Law HW, Hung T, Lau PY. Developing a predictive tool for post-operative delirium in orthopaedic settings in Hong Kong. <i>International Journal of Orthopaedic and Trauma Nursing</i> . 2012; 16(3): 147-159. DOI: 10.1016/j.ijotn.2012.03.005                                     | Wrong age group                                                                                                                                 |
| 369 | Ubis Diez E, Abad Ruiz A, Palacin Arino C. Functional evolution and need for resources in geriatric patients with hip fracture. <i>European Geriatric Medicine</i> . 2011; 2: S89-S90. DOI: 10.1016/j.eurger.2011.06.002                                                                                                                                     | No associations of interest: the study reports delirium and UTI/asymptomatic bacteriuria, but not in relation to each other                     |
| 370 | Unneby A, Svensson PO, Gustafson PY, Lindgren APB-M, Bergstrom U, Olofsson PB. Complications with focus on delirium during hospital stay related to femoral nerve block compared to conventional pain management among patients with hip fracture - A randomised controlled trial. <i>Injury</i> . 2020; 51(7): 1634-1641. DOI: 10.1016/j.injury.2020.04.013 | No associations of interest: the study reports delirium and UTI/asymptomatic bacteriuria, but not in relation to each other                     |
| 371 | Van Munster BC, De Rooij SE. Delirium: a synthesis of current knowledge. <i>Clinical Medicine</i> . 2014; 14(2): 192-195. DOI: 10.7861/clinmedicine.14-2-192                                                                                                                                                                                                 | Not a primary study (review/comment)                                                                                                            |
| 372 | Van Waarde JA, van der Mast RC. Delirium in learning disability: case series and literature review. <i>British Journal of Learning Disabilities</i> . 2004; 32(3): 123-127. DOI: 10.1111/j.1468-3156.2004.00269.x                                                                                                                                            | Case report/series                                                                                                                              |
| 373 | Varghese Gupta S, Dharia S, Shaeer K. DIAGNOSIS, ASSESSMENT, AND MANAGEMENT OF URINARY TRACT INFECTIONS IN ASSISTED LIVING FACILITY RESIDING POSTMENOPAUSAL WOMEN WITH DEMENTIA: A RETROSPECTIVE REVIEW. <i>Value in Health</i> . 2016; 19(3): A211-A212. DOI: 10.1016/j.jval.2016.03.1233                                                                   | No associations of interest: the study does not report UTI or asymptomatic bacteriuria                                                          |
| 374 | Vasudevan VN, Thomas D, Flaherty J, Bassil N, Vegi S. Delirium associated with urinary tract infection. <i>Journal of the American Geriatrics Society</i> . 2009; 57: S186. DOI: 10.1111/j.1532-5415.2009.02272.x                                                                                                                                            | No associations of interest: wrong condition (patients with urinary tract infection and asymptomatic bacteriuria are put together in one group) |
| 375 | Vevatne V, Ranhoff AH, Alaburic S, Svendsen T, Mensen L, Engstad T, Engvik A. Acute functional decline in patients                                                                                                                                                                                                                                           | No associations of interest: the study reports delirium and UTI/asymptomatic                                                                    |

|     |                                                                                                                                                                                                                                                                                                                                                   |                                                                                                                                                                         |
|-----|---------------------------------------------------------------------------------------------------------------------------------------------------------------------------------------------------------------------------------------------------------------------------------------------------------------------------------------------------|-------------------------------------------------------------------------------------------------------------------------------------------------------------------------|
|     | admitted for acute geriatric care. <i>European Geriatric Medicine</i> . 2015; 6: S42. DOI: 10.1016/s1878-7649(15)30143-1                                                                                                                                                                                                                          | bacteriuria, but not in relation to each other                                                                                                                          |
| 376 | Volland J, Fisher A, Drexler D. Delirium and Dementia in the Intensive Care Unit: Increasing Awareness for Decreasing Risk, Improving Outcomes, and Family Engagement. <i>Dimensions of critical care nursing</i> . 2015; 34(5): 259-264. DOI: 10.1097/DCC.000000000000133                                                                        | Not a primary study (review/comment)                                                                                                                                    |
| 377 | Wang J, Yu S, Li C, Zang J, Wang Y. Treatment of intertrochanteric fractures with forwardly and angularly displaced proximal part. [Chinese]. <i>Chinese Journal of Reparative and Reconstructive Surgery</i> . 2018; 32(9): 1162-1166. DOI: 10.7507/1002-1892.201711099                                                                          | No associations of interest: the study reports delirium and UTI/asymptomatic bacteriuria, but not in relation to each other                                             |
| 378 | Ward K, Bungo C, Naumovski J, Nace D. Revisiting Antibiotic Stewardship in Long term Care Residents. <i>Journal of the American Geriatrics Society</i> . 2017; 65: S36. DOI: 10.1111/jgs.14915                                                                                                                                                    | No control group                                                                                                                                                        |
| 379 | Warshaw G, Tanzer F. The Effectiveness of Lumbar Puncture in the Evaluation of Delirium and Fever in the Hospitalized Elderly. <i>Archives of family medicine</i> . 1993; 2(3): 293-297. PMID: 8252150                                                                                                                                            | Case report/series                                                                                                                                                      |
| 380 | Wetterling T. Somatic Diseases in Elderly Patients with Delirium. [German]. <i>Zeitschrift fur Gerontopsychologie und -psychiatrie</i> . 2005; 18(1): 3-7. DOI: 10.1024/1011-6877.18.1.3                                                                                                                                                          | Loss of quantitative data (the study reports data about treatment periods and not about rates of UTI or asymptomatic bacteriuria in patients with and without delirium) |
| 381 | Woo MY, Bradley J, Moore S, Liew A, Lalonde K, Stiell IG. Pilot prospective cohort study for the use of ultrasound guided 3 in 1 femoral nerve blocks in a tertiary care emergency department in patients presenting with a hip fracture. <i>Canadian Journal of Emergency Medicine</i> . 2014; 15 (Suppl 1): S41. DOI: 10.1017/S1481803500003171 | No associations of interest: the study reports delirium and UTI/asymptomatic bacteriuria, but not in relation to each other                                             |
| 382 | Wu X, Chen JC, Wang WL, Hao B, Chen X, Hu XW. Long-term follow-up study on the safety of deep brain stimulation for treating Parkinson's disease. [Chinese]. <i>Chinese Journal of Contemporary Neurology and Neurosurgery</i> . 2015; 15(10): 790-794. DOI: 10.3969/j.issn.1672-6731.2015.10.005                                                 | No associations of interest: the study reports delirium and UTI/asymptomatic bacteriuria, but not in relation to each other                                             |
| 383 | Wu X, Sun W, Tan M. Incidence and Risk Factors for Postoperative Delirium in Patients Undergoing Spine Surgery: A Systematic Review and Meta-Analysis. <i>BioMed Research International</i> . 2019; 2019: 1-20. DOI: 10.1155/2019/2139834                                                                                                         | Not a primary study (review/comment)                                                                                                                                    |
| 384 | Wurzinger B, Duenser MW, Wohlmuth C, Deutinger MC, Ulmer H, Torgersen C, Schmittinger CA, Grandner W, Hasibeder WR. The association between body-mass index and patient outcome in septic shock: a retrospective cohort study. <i>Wiener Klinische Wochenschrift</i> . 2010; 122(1): 31-36. DOI: 10.1007/s00508-009-1241-4                        | No associations of interest: the study reports delirium and UTI/asymptomatic bacteriuria, but not in relation to each other                                             |
| 385 | Yamada U, Yokota K, Ohta D, Furukawa K. Delirium could be an indicator of sepsis in patients under 65 years old with urinary tract infections. <i>Critical Care</i> . 2012; 16(Suppl 1): S121. DOI: 10.1186/cc10943                                                                                                                               | No control group                                                                                                                                                        |
| 386 | Yang Q, Wang J, Huang X, Xu Y, Zhang Y. Incidence and risk factors associated with postoperative delirium following primary elective total hip arthroplasty: a retrospective nationwide inpatient sample database study. <i>BMC Psychiatry</i> . 2020; 20(1): 343. DOI: 10.1186/s12888-020-02742-6                                                | No associations of interest: the study does not report UTI or asymptomatic bacteriuria                                                                                  |

|     |                                                                                                                                                                                                                                                                                        |                                                                                                                                                                                                                                                                                                                                                                                                            |
|-----|----------------------------------------------------------------------------------------------------------------------------------------------------------------------------------------------------------------------------------------------------------------------------------------|------------------------------------------------------------------------------------------------------------------------------------------------------------------------------------------------------------------------------------------------------------------------------------------------------------------------------------------------------------------------------------------------------------|
| 387 | Yang Y, Liu B, Shi T. INCIDENCE, PREDICTORS AND OUTCOMES OF POSTOPERATIVE DELIRIUM FOLLOWING CORONARY ARTERY BYPASS GRAFTING. <i>Journal of the American College of Cardiology</i> . 2020; 75 (11): 139. DOI: 10.1016/S0735-1097(20)30766-X                                            | No associations of interest: the study does not report UTI or asymptomatic bacteriuria                                                                                                                                                                                                                                                                                                                     |
| 388 | Yessengaliyeva E, Nagar A, Westerman P. Asymptomatic bacteriuria and Dementia Deterioration in Older Females Admitted to a Gero-Psychiatric Unit. <i>The American Journal of Geriatric Psychiatry</i> . 2014; 22(3): S67-S68. DOI: 10.1016/j.jagp.2013.12.072                          | No associations of interest: the study does not report delirium                                                                                                                                                                                                                                                                                                                                            |
| 389 | Yi X, Kumar V, Savani C, Singh T, Renati S. Delirium is Associated with Increased Readmissions and Mortality in Patients with Acute Ischemic Stroke. <i>Neurology [Conference Publication: 71st Annual Meeting of the American Academy of Neurology, AAN]</i> . 2019; 92(15).          | Repetitive publication. The same data is provided in the article: Savani C, Kumar V, Singh T, Yi X, Pathak A, Chib A, Renati S. Delirium is Associated With Increased Readmissions and Mortality in Patients With Acute Ischemic Stroke. <i>Stroke [Conference Publication: International Stroke Conference 2019, Honolulu, Hawaii, USA]</i> . 2019; 50: Abstract TP358. DOI: 10.1161/str.50.suppl_1.TP358 |
| 390 | Yong DH, Ngeo I. Elderly Orthopedic Patients Transferred to an Intermediate Care Facility in Singapore - A One Year Review. <i>Journal of the American Medical Directors Association</i> . 2010; 11(3): B10. DOI: 10.1016/j.jamda.2009.12.026                                          | No associations of interest: the study reports delirium and UTI/asymptomatic bacteriuria, but not in relation to each other                                                                                                                                                                                                                                                                                |
| 391 | Yue S, Ker J, Ullal MJ, Su S, Mok WQ, Yiap PL, Yu LH, Ming S, Lim M, Hong AL. The use of a urinary tract management protocol in an integrated hip fracture unit to reduce urinary tract infections. <i>European Geriatric Medicine</i> . 2017; 8(Suppl 1): S241. ISSN: 1878-7649       | No associations of interest: the study reports delirium and UTI/asymptomatic bacteriuria, but not in relation to each other                                                                                                                                                                                                                                                                                |
| 392 | Zamora A, Lopez Camacho C, Baeza V. The Delirium in a Service of Palliative Care. <i>Palliative Medicine</i> . 2010; 24(4): S133. DOI: 10.1177/0269216310366390                                                                                                                        | No associations of interest: the study does not report UTI or asymptomatic bacteriuria                                                                                                                                                                                                                                                                                                                     |
| 393 | Zanni GR, Wick JY. Hip Fracture: Improving the Outcome. <i>The Consultant Pharmacist</i> . 2007; 22(9): 712-724. DOI: 10.4140/TCP.n.2007.710                                                                                                                                           | Not a primary study (review/comment)                                                                                                                                                                                                                                                                                                                                                                       |
| 394 | Zipser CM, Deuel J, Ernst J, Schubert M, von Kanel R, Bottger S. The predisposing and precipitating risk factors for delirium in neurosurgery: a prospective cohort study of 949 patients. <i>Acta Neurochirurgica</i> . 2019; 161(7): 1307-1315. DOI: 10.1007/s00701-019-03927-z      | No associations of interest: the study does not report UTI or asymptomatic bacteriuria                                                                                                                                                                                                                                                                                                                     |
| 395 | Zuliani G, Galvani M, Sioulis F, Bonetti F, Prandini S, Boari B, Guerzoni F, Gallerani M. Discharge diagnosis and comorbidity profile in hospitalized older patients with dementia. <i>International Journal of Geriatric Psychiatry</i> . 2011; 27(3): 313-320. DOI: 10.1002/gps.2722 | No associations of interest: the study reports delirium and UTI/asymptomatic bacteriuria, but not in relation to each other                                                                                                                                                                                                                                                                                |
| 396 | Zycinska K, Wardyn KA, Nitsch-Osuch A. Specificity and nature of urinary tract infections (UTIs) in elderly patients referred to hospital by GPs. <i>Family Medicine and Primary Care Review</i> . 2007; 9(3): 665-669. ISSN: 1734-3402                                                | No control group                                                                                                                                                                                                                                                                                                                                                                                           |

**Supplementary Table S4**  
**Quality assessment of included studies according to the Newcastle-Ottawa Scale**

|                                                           | Selection |          |          |          | Comparability |          | Outcome  |          |          |              |
|-----------------------------------------------------------|-----------|----------|----------|----------|---------------|----------|----------|----------|----------|--------------|
| <b>NEWCASTLE-OTTAWA SCALE FOR CASE CONTROL STUDIES</b>    | <b>1</b>  | <b>2</b> | <b>3</b> | <b>4</b> | <b>5</b>      | <b>6</b> | <b>7</b> | <b>8</b> | <b>9</b> | <b>Score</b> |
| Gau, 2009                                                 | 1a        | 1a       | 0b       | 1a       | 1a, age       | 0        | 0d       | 1a       | 1a       | 6            |
| Perez-Ros, 2018                                           | 1a        | 1a       | 1a       | 1a       | 0             | 0        | 0d       | 1a       | 1a       | 6            |
| Stroomer-van Wijk, 2016                                   | 1a        | 1a       | 1a       | 1a       | 0             | 0        | 0d       | 1a       | 1a       | 6            |
| <b>NEWCASTLE-OTTAWA SCALE FOR COHORT STUDIES</b>          | <b>1</b>  | <b>2</b> | <b>3</b> | <b>4</b> | <b>5</b>      | <b>6</b> | <b>7</b> | <b>8</b> | <b>9</b> | <b>Score</b> |
| Alvarez-Perez, 2017                                       | 1b        | 1a       | 1a       | 0b       | 0             | 0        | 1b       | 1a       | 1a       | 6            |
| Anderson, 2010                                            | 1b        | 1a       | 1a       | 0b       | 0             | 0        | 1b       | 1a       | 1a       | 6            |
| Arshi, 2018                                               | 1b        | 1a       | 0d       | 0b       | 0             | 0        | 1b       | 1a       | 1a       | 5            |
| Brouquet, 2010                                            | 1b        | 1a       | 1a       | 0b       | 0             | 0        | 1b       | 1a       | 1a       | 6            |
| Edlund, 2001                                              | 1b        | 1a       | 1a       | 0b       | 0             | 0        | 0d       | 1a       | 1a       | 5            |
| Edlund, 2006                                              | 1b        | 1a       | 1a       | 0b       | 0             | 0        | 1b       | 1a       | 1a       | 6            |
| Elsamadicy, 2017                                          | 1b        | 1a       | 1a       | 0b       | 0             | 0        | 1b       | 1a       | 1a       | 6            |
| Gual, 2018                                                | 1b        | 1a       | 1a       | 0b       | 0             | 0        | 1b       | 1a       | 1a       | 6            |
| Jitapunkul, 1992                                          | 1b        | 1a       | 1a       | 0b       | 0             | 0        | 1b       | 1a       | 1a       | 6            |
| Khurana, 2002                                             | 1b        | 1a       | 1a       | 0b       | 0             | 0        | 1b       | 1a       | 1a       | 6            |
| Kobayashi, 2017                                           | 1b        | 1a       | 0d       | 0b       | 0             | 0        | 1b       | 1a       | 1a       | 5            |
| Large, 2013                                               | 1b        | 1a       | 1a       | 0b       | 0             | 0        | 1b       | 1a       | 1a       | 6            |
| Lundström, 2004                                           | 1b        | 1a       | 1a       | 0b       | 0             | 0        | 1b       | 1a       | 1a       | 6            |
| Lundström, 2005                                           | 1b        | 1a       | 1a       | 0b       | 0             | 0        | 1b       | 1a       | 1a       | 6            |
| Marcantonio, 2005                                         | 1b        | 1a       | 1a       | 0b       | 0             | 0        | 1b       | 1a       | 1a       | 6            |
| Morandi, 2019                                             | 1b        | 1a       | 1a       | 0b       | 0             | 0        | 1b       | 1a       | 1a       | 6            |
| Olofsson, 2005                                            | 1b        | 1a       | 1a       | 0b       | 0             | 0        | 1b       | 1a       | 1a       | 6            |
| Olofsson, 2018                                            | 1b        | 1a       | 1a       | 0b       | 0             | 0        | 1b       | 1a       | 1a       | 6            |
| Raats, 2015                                               | 1b        | 1a       | 1a       | 0b       | 0             | 0        | 1b       | 1a       | 1a       | 6            |
| Schuurmans, 2003                                          | 1b        | 1a       | 1a       | 0b       | 0             | 0        | 1b       | 1a       | 1a       | 6            |
| Wojszel, 2018                                             | 1b        | 1a       | 1a       | 0b       | 0             | 0        | 1b       | 1a       | 1a       | 6            |
| <b>NEWCASTLE-OTTAWA SCALE FOR CROSS-SECTIONAL STUDIES</b> | <b>1</b>  | <b>2</b> | <b>3</b> | <b>4</b> | <b>5</b>      | <b>6</b> | <b>7</b> | <b>8</b> |          | <b>Score</b> |
| Amado Tineo, 2013                                         | 1b        | 1a       | 1a       | 1a       | 0             | 0        | 1b       | 1a       |          | 6            |
| de Bortoli Pereira, 2018                                  | 1b        | 1a       | 1a       | 1a       | 0             | 0        | 1b       | 1a       |          | 6            |
| Eriksson, 2010                                            | 1b        | 1a       | 1a       | 0c       | 1a, gender    | 0        | 1b       | 1a       |          | 6            |
| Eriksson, 2011                                            | 1b        | 1a       | 1a       | 1a       | 1a, gender    | 0        | 1b       | 1a       |          | 7            |
| Sandberg, 1999                                            | 1b        | 1a       | 1a       | 1a       | 1a, gender    | 0        | 0d       | 1a       |          | 6            |

**Supplementary Table S5**  
**Complete list of all moderators of the meta-regression analysis**

| Moderator                                                                                                         | Type of moderator | Number of studies |
|-------------------------------------------------------------------------------------------------------------------|-------------------|-------------------|
| <i>General data</i>                                                                                               |                   |                   |
| Publication year                                                                                                  | numerical         | 29                |
| Study country                                                                                                     | categorical       | 29                |
| Study type                                                                                                        | categorical       | 29                |
| Study temporality                                                                                                 | categorical       | 29                |
| Study setting                                                                                                     | categorical       | 29                |
| Method to establish the diagnosis of delirium                                                                     | categorical       | 29                |
| Method to establish the diagnosis of UTI                                                                          | categorical       | 29                |
| Quality of study (rating on the Newcastle-Ottawa Scale)                                                           | numerical         | 29                |
| Mean age of study participants                                                                                    | numerical         | 24                |
| Gender (% of male) of study participants                                                                          | numerical         | 29                |
| <i>Socioeconomic status (the percentage of participants in the whole study group)</i>                             |                   |                   |
| Institutional care                                                                                                | numerical         | 10                |
| Independent living                                                                                                | numerical         | 7                 |
| <i>Race/Ethnicity (the percentage of participants in the whole study group)</i>                                   |                   |                   |
| Caucasian race                                                                                                    | numerical         | 4                 |
| <i>Type and prevalence of medical comorbidities (the percentage of participants in the whole study group)</i>     |                   |                   |
| Anemia                                                                                                            | numerical         | 4                 |
| Atrial fibrillation                                                                                               | numerical         | 5                 |
| Constipation                                                                                                      | numerical         | 6                 |
| COPD                                                                                                              | numerical         | 7                 |
| Dehydration                                                                                                       | numerical         | 5                 |
| Diabetes, unspecified                                                                                             | numerical         | 13                |
| Falls                                                                                                             | numerical         | 7                 |
| Heart failure, unspecified                                                                                        | numerical         | 14                |
| Hip fracture                                                                                                      | numerical         | 8                 |
| Hypertension                                                                                                      | numerical         | 11                |
| Impaired hearing                                                                                                  | numerical         | 8                 |
| Impaired vision                                                                                                   | numerical         | 8                 |
| Malignancy, unspecified                                                                                           | numerical         | 5                 |
| Malnutrition                                                                                                      | numerical         | 5                 |
| Myocardial infarction                                                                                             | numerical         | 9                 |
| Pneumonia                                                                                                         | numerical         | 11                |
| Pulmonary embolism                                                                                                | numerical         | 4                 |
| Renal failure                                                                                                     | numerical         | 7                 |
| Smoking                                                                                                           | numerical         | 6                 |
| Stroke                                                                                                            | numerical         | 14                |
| Urinary catheter                                                                                                  | numerical         | 8                 |
| Urinary retention                                                                                                 | numerical         | 6                 |
| <i>Type and prevalence of psychiatric comorbidities (the percentage of participants in the whole study group)</i> |                   |                   |
| Dementia                                                                                                          | numerical         | 20                |
| Depression                                                                                                        | numerical         | 10                |
| <i>Type of received medication (and percentage of receiving participants in the whole study group)</i>            |                   |                   |
| Antidepressants                                                                                                   | numerical         | 5                 |
| Benzodiazepines                                                                                                   | numerical         | 5                 |
| Diuretics                                                                                                         | numerical         | 4                 |
| Drugs with anticholinergic properties                                                                             | numerical         | 4                 |
| Neuroleptics                                                                                                      | numerical         | 8                 |
| Opioids                                                                                                           | numerical         | 6                 |



**Supplementary Table S6**  
**List of data from each included study used for meta-regression**

|                            |                                                                                                                                                                                                                                                                                                                                                                                                                                                                                                                                                                                                                                                                                                                                                                                                                                                                                                                                                                                                                                                                                                                                                                                                                                                                                                                                                                                                                                                                                                          |
|----------------------------|----------------------------------------------------------------------------------------------------------------------------------------------------------------------------------------------------------------------------------------------------------------------------------------------------------------------------------------------------------------------------------------------------------------------------------------------------------------------------------------------------------------------------------------------------------------------------------------------------------------------------------------------------------------------------------------------------------------------------------------------------------------------------------------------------------------------------------------------------------------------------------------------------------------------------------------------------------------------------------------------------------------------------------------------------------------------------------------------------------------------------------------------------------------------------------------------------------------------------------------------------------------------------------------------------------------------------------------------------------------------------------------------------------------------------------------------------------------------------------------------------------|
| <b>Alvarez-Perez, 2017</b> | <p><b>General data</b><br/> Publication year: 2017; Country of study (categorical moderator): Portugal; Type of the study (categorical moderator): cohort; Study temporality (categorical moderator): retrospective; Study setting (categorical moderator): clinical; Method to establish the diagnosis of delirium (categorical moderator): accordance to criteria of DSM or ICD (any version); Method to establish the diagnosis of UTI (categorical moderator): diagnosis recorded in medical files; Quality of study (Newcastle-Ottawa scale total score): 6; Mean age (all study participants): 73.9 years; Gender (% of male among all study participants): 52.4%</p> <p><b>Socioeconomic status of participants in the whole group (relevant for meta-regression)</b><br/> No data relevant for meta-regression</p> <p><b>Race/Ethnicity of participants in the whole group (relevant for meta-regression)</b><br/> No data relevant for meta-regression</p> <p><b>Type and prevalence of medical comorbidities in the whole group (relevant for meta-regression)</b><br/> Atrial fibrillation 27.7%; Diabetes 22.73%; Hypertension 80.62%; Smoking 19.75%; Stroke 100%</p> <p><b>Type and prevalence of psychiatric comorbidities in the whole group (relevant for meta-regression)</b><br/> Dementia 4.35%</p> <p><b>Type of received medication (and percentage of receiving participants) in the whole group (relevant for meta-regression)</b><br/> No data relevant for meta-regression</p> |
| <b>Amadeo Tineo, 2013</b>  | <p><b>General data</b><br/> Publication year: 2013; Country of study (categorical moderator): Peru; Type of the study (categorical moderator): cross-sectional; Study temporality (categorical moderator): prospective; Study setting (categorical moderator): clinical; Method to establish the diagnosis of delirium (categorical moderator): scales accordance to criteria of DSM or ICD (any version); Method to establish the diagnosis of UTI (categorical moderator): diagnosis recorded in medical files; Quality of study (Newcastle-Ottawa scale total score): 6; Mean age (all study participants): 78.5 years; Gender (% of male among all study participants): 44.2%</p> <p><b>Socioeconomic status of participants in the whole group (relevant for meta-regression)</b><br/> No data relevant for meta-regression</p> <p><b>Race/Ethnicity of participants in the whole group (relevant for meta-regression)</b><br/> No data relevant for meta-regression</p> <p><b>Type and prevalence of medical comorbidities in the whole group (relevant for meta-regression)</b><br/> Malignancy 22.09%; Renal Failure 8.72%</p> <p><b>Type and prevalence of psychiatric comorbidities in the whole group (relevant for meta-regression)</b><br/> Dementia 19.77%</p> <p><b>Type of received medication (and percentage of receiving participants) in the whole group (relevant for meta-regression)</b><br/> Benzodiazepines 12.21%; Diuretics 17.44%; Neuroleptics 1.74%</p>                    |
| <b>Anderson, 2010</b>      | <p><b>General data</b></p>                                                                                                                                                                                                                                                                                                                                                                                                                                                                                                                                                                                                                                                                                                                                                                                                                                                                                                                                                                                                                                                                                                                                                                                                                                                                                                                                                                                                                                                                               |

|               |                                                                                                                                                                                                                                                                                                                                                                                                                                                                                                                                                                                                                                                                                                                                                                                                                                                                                                                                                                                                                                                                                                                                                                                                                                                                                                                                                                                                                                                                                                                                                                                                                                         |
|---------------|-----------------------------------------------------------------------------------------------------------------------------------------------------------------------------------------------------------------------------------------------------------------------------------------------------------------------------------------------------------------------------------------------------------------------------------------------------------------------------------------------------------------------------------------------------------------------------------------------------------------------------------------------------------------------------------------------------------------------------------------------------------------------------------------------------------------------------------------------------------------------------------------------------------------------------------------------------------------------------------------------------------------------------------------------------------------------------------------------------------------------------------------------------------------------------------------------------------------------------------------------------------------------------------------------------------------------------------------------------------------------------------------------------------------------------------------------------------------------------------------------------------------------------------------------------------------------------------------------------------------------------------------|
|               | <p>Publication year: 2010; Country of study (categorical moderator): USA; Type of the study (categorical moderator): cohort; Study temporality (categorical moderator): prospective; Study setting (categorical moderator): nursing home; Method to establish the diagnosis of delirium (categorical moderator): scales accordance to criteria of DSM or ICD (any version); Method to establish the diagnosis of UTI (categorical moderator): diagnosis recorded in medical files; Quality of study (Newcastle-Ottawa scale total score): 6; Mean age (all study participants): 83.6 years; Gender (% of male among all study participants): 34.3%</p> <p><b>Socioeconomic status of participants in the whole group (relevant for meta-regression)</b><br/>No data relevant for meta-regression</p> <p><b>Race/Ethnicity of participants in the whole group (relevant for meta-regression)</b><br/>No data relevant for meta-regression</p> <p><b>Type and prevalence of medical comorbidities in the whole group (relevant for meta-regression)</b><br/>COPD 0%; Dehydration 5.14%; Falls 27.14%; Heart Failure 3.71%; Hypertension 0.86%; Malnutrition 0.29%; Myocardial Infarction 0%; Pneumonia 5.43%; Pulmonary Embolism 0%; Renal Failure 0.57; Stroke 0%; Urinary Retention 1.43%</p> <p><b>Type and prevalence of psychiatric comorbidities in the whole group (relevant for meta-regression)</b><br/>No data relevant for meta-regression</p> <p><b>Type of received medication (and percentage of receiving participants) in the whole group (relevant for meta-regression)</b><br/>No data relevant for meta-regression</p> |
| Arshi, 2018   | <p><b>General data</b><br/>Publication year: 2018; Country of study (categorical moderator): USA; Type of the study (categorical moderator): cohort; Study temporality (categorical moderator): prospective; Study setting (categorical moderator): clinical; Method to establish the diagnosis of delirium (categorical moderator): diagnosis recorded in medical files; Method to establish the diagnosis of UTI (categorical moderator): diagnosis recorded in medical files; Quality of study (Newcastle-Ottawa scale total score): 5; Gender (% of male among all study participants): 28.5%</p> <p><b>Socioeconomic status of participants in the whole group (relevant for meta-regression)</b><br/>No data relevant for meta-regression</p> <p><b>Race/Ethnicity of participants in the whole group (relevant for meta-regression)</b><br/>Caucasian race 94.05%</p> <p><b>Type and prevalence of medical comorbidities in the whole group (relevant for meta-regression)</b><br/>COPD 10.72%; Diabetes 17.57%; Heart Failure 4.09%; Hip Fracture 100%; Hypertension 69.04%; Myocardial Infarction 2.97%; Pneumonia 4.25%; Pulmonary Embolism 0.76%; Renal Failure 2.96%; Smoking 8.44%</p> <p><b>Type and prevalence of psychiatric comorbidities in the whole group (relevant for meta-regression)</b><br/>Dementia 31.45%;</p> <p><b>Type of received medication (and percentage of receiving participants) in the whole group (relevant for meta-regression)</b><br/>No data relevant for meta-regression</p>                                                                                                               |
| Broquet, 2010 | <p><b>General data</b><br/>Publication year: 2010; Country of study (categorical moderator): France; Type of the study (categorical moderator): cohort; Study temporality (categorical moderator):</p>                                                                                                                                                                                                                                                                                                                                                                                                                                                                                                                                                                                                                                                                                                                                                                                                                                                                                                                                                                                                                                                                                                                                                                                                                                                                                                                                                                                                                                  |

|                                         |                                                                                                                                                                                                                                                                                                                                                                                                                                                                                                                                                                                                                                                                                                                                                                                                                                                                                                                                                                                                                                                                                                                                                                                                                                                                                                                                                                                                                   |
|-----------------------------------------|-------------------------------------------------------------------------------------------------------------------------------------------------------------------------------------------------------------------------------------------------------------------------------------------------------------------------------------------------------------------------------------------------------------------------------------------------------------------------------------------------------------------------------------------------------------------------------------------------------------------------------------------------------------------------------------------------------------------------------------------------------------------------------------------------------------------------------------------------------------------------------------------------------------------------------------------------------------------------------------------------------------------------------------------------------------------------------------------------------------------------------------------------------------------------------------------------------------------------------------------------------------------------------------------------------------------------------------------------------------------------------------------------------------------|
|                                         | <p>prospective; Study setting (categorical moderator): clinical; Method to establish the diagnosis of delirium (categorical moderator): scales accordance to criteria of DSM or ICD (any version); Method to establish the diagnosis of UTI (categorical moderator): diagnosis recorded in medical files; Quality of study (Newcastle-Ottawa scale total score): 6; Mean age (all study participants): 81.3 years; Gender (% of male among all study participants): 47.5%</p> <p><b>Socioeconomic status of participants in the whole group (relevant for meta-regression)</b><br/>No data relevant for meta-regression</p> <p><b>Race/Ethnicity of participants in the whole group (relevant for meta-regression)</b><br/>No data relevant for meta-regression</p> <p><b>Type and prevalence of medical comorbidities in the whole group (relevant for meta-regression)</b><br/>Diabetes 11.86%; Heart Failure 0.85%; Malignancy 87.29%; Myocardial Infarction 2.54%; Pneumonia 7.63%; Pulmonary Embolism 0.85%; Smoking 10.17%; Stroke 0.85%</p> <p><b>Type and prevalence of psychiatric comorbidities in the whole group (relevant for meta-regression)</b><br/>No data relevant for meta-regression</p> <p><b>Type of received medication (and percentage of receiving participants) in the whole group (relevant for meta-regression)</b><br/>Opioids 97.46%</p>                                            |
| <p><b>De Bortoli Perreira, 2018</b></p> | <p><b>General data</b><br/>Publication year: 2018; Country of study (categorical moderator): Brazil; Type of the study (categorical moderator): cross-sectional; Study temporality (categorical moderator): prospective; Study setting (categorical moderator): clinical; Method to establish the diagnosis of delirium (categorical moderator): scales accordance to criteria of DSM or ICD (any version); Method to establish the diagnosis of UTI (categorical moderator): diagnosis recorded in medical files; Quality of study (Newcastle-Ottawa scale total score): 6; Mean age (all study participants): 71.2 years; Gender (% of male among all study participants): 64.2%</p> <p><b>Socioeconomic status of participants in the whole group (relevant for meta-regression)</b><br/>No data relevant for meta-regression</p> <p><b>Race/Ethnicity of participants in the whole group (relevant for meta-regression)</b><br/>No data relevant for meta-regression</p> <p><b>Type and prevalence of medical comorbidities in the whole group (relevant for meta-regression)</b><br/>Renal Failure 12.79%</p> <p><b>Type and prevalence of psychiatric comorbidities in the whole group (relevant for meta-regression)</b><br/>Dementia 13.95%;</p> <p><b>Type of received medication (and percentage of receiving participants) in the whole group (relevant for meta-regression)</b><br/>Opioids 5.81%</p> |
| <p><b>Edlund, 2001</b></p>              | <p><b>General data</b><br/>Publication year: 2001; Country of study (categorical moderator): Sweden; Type of the study (categorical moderator): cohort; Study temporality (categorical moderator): prospective; Study setting (categorical moderator): clinical; Method to establish the diagnosis of delirium (categorical moderator): accordance to criteria of DSM or ICD (any version); Method to establish the diagnosis of UTI (categorical moderator):</p>                                                                                                                                                                                                                                                                                                                                                                                                                                                                                                                                                                                                                                                                                                                                                                                                                                                                                                                                                 |

|                         |                                                                                                                                                                                                                                                                                                                                                                                                                                                                                                                                                                                                                                                                                                                                                                                                                                                                                                                                                                                                                                                                                                                                                                                                                                                                                                                                                                                                                                                                                                                                                                                                                                                                                 |
|-------------------------|---------------------------------------------------------------------------------------------------------------------------------------------------------------------------------------------------------------------------------------------------------------------------------------------------------------------------------------------------------------------------------------------------------------------------------------------------------------------------------------------------------------------------------------------------------------------------------------------------------------------------------------------------------------------------------------------------------------------------------------------------------------------------------------------------------------------------------------------------------------------------------------------------------------------------------------------------------------------------------------------------------------------------------------------------------------------------------------------------------------------------------------------------------------------------------------------------------------------------------------------------------------------------------------------------------------------------------------------------------------------------------------------------------------------------------------------------------------------------------------------------------------------------------------------------------------------------------------------------------------------------------------------------------------------------------|
|                         | <p>diagnosis recorded in medical files; Quality of study (Newcastle-Ottawa scale total score): 5; Mean age (all study participants): 78.8 years; Gender (% of male among all study participants): 21.1%</p> <p><b>Socioeconomic status of participants in the whole group (relevant for meta-regression)</b><br/>No data relevant for meta-regression</p> <p><b>Race/Ethnicity of participants in the whole group (relevant for meta-regression)</b><br/>No data relevant for meta-regression</p> <p><b>Type and prevalence of medical comorbidities in the whole group (relevant for meta-regression)</b><br/>Hip Fracture 100%; Pneumonia 2.82%</p> <p><b>Type and prevalence of psychiatric comorbidities in the whole group (relevant for meta-regression)</b><br/>Dementia 4.23%; Depression 9.86%</p> <p><b>Type of received medication (and percentage of receiving participants) in the whole group (relevant for meta-regression)</b><br/>Drugs with anticholinergic properties 19.72%; Neuroleptics 11.27%</p>                                                                                                                                                                                                                                                                                                                                                                                                                                                                                                                                                                                                                                                        |
| <b>Edlund, 2006</b>     | <p><b>General data</b><br/>Publication year: 2006; Country of study (categorical moderator): Sweden; Type of the study (categorical moderator): cohort; Study temporality (categorical moderator): prospective; Study setting (categorical moderator): clinical; Method to establish the diagnosis of delirium (categorical moderator): accordance to criteria of DSM or ICD (any version); Method to establish the diagnosis of UTI (categorical moderator): diagnosis recorded in medical files; Quality of study (Newcastle-Ottawa scale total score): 6; Mean age (all study participants): 80.2 years; Gender (% of male among all study participants): 44.3%</p> <p><b>Socioeconomic status of participants in the whole group (relevant for meta-regression)</b><br/>No data relevant for meta-regression</p> <p><b>Race/Ethnicity of participants in the whole group (relevant for meta-regression)</b><br/>No data relevant for meta-regression</p> <p><b>Type and prevalence of medical comorbidities in the whole group (relevant for meta-regression)</b><br/>Atrial Fibrillation 19.75%; Constipation 7.25%; Diabetes 33%; Heart Failure 25.5%; Hypertension 38%; Malignancy 3.75%; Myocardial Infarction 7.25%; Pneumonia 5.75%; Stroke 21%; Urinary Catheter 4.25%</p> <p><b>Type and prevalence of psychiatric comorbidities in the whole group (relevant for meta-regression)</b><br/>Dementia 2.5%; Depression 3%</p> <p><b>Type of received medication (and percentage of receiving participants) in the whole group (relevant for meta-regression)</b><br/>Antidepressant 3.25%; Benzodiazepines 6.75%; Diuretics 58%; Neuroleptics 9.5%; Opioids 9.75%</p> |
| <b>Elsamadicy, 2017</b> | <p><b>General data</b><br/>Publication year: 2017; Country of study (categorical moderator): USA; Type of the study (categorical moderator): cohort; Study temporality (categorical moderator): retrospective; Study setting (categorical moderator): clinical; Method to establish the diagnosis of delirium (categorical moderator): accordance to criteria of DSM or ICD (any version); Method to establish the diagnosis of UTI (categorical moderator): diagnosis recorded in medical files; Quality of study (Newcastle-Ottawa scale total</p>                                                                                                                                                                                                                                                                                                                                                                                                                                                                                                                                                                                                                                                                                                                                                                                                                                                                                                                                                                                                                                                                                                                            |

|                       |                                                                                                                                                                                                                                                                                                                                                                                                                                                                                                                                                                                                                                                                                                                                                                                                                                                                                                                                                                                                                                                                                                                                                                                                                                                                                                                                                                                                                                                                                                                                   |
|-----------------------|-----------------------------------------------------------------------------------------------------------------------------------------------------------------------------------------------------------------------------------------------------------------------------------------------------------------------------------------------------------------------------------------------------------------------------------------------------------------------------------------------------------------------------------------------------------------------------------------------------------------------------------------------------------------------------------------------------------------------------------------------------------------------------------------------------------------------------------------------------------------------------------------------------------------------------------------------------------------------------------------------------------------------------------------------------------------------------------------------------------------------------------------------------------------------------------------------------------------------------------------------------------------------------------------------------------------------------------------------------------------------------------------------------------------------------------------------------------------------------------------------------------------------------------|
|                       | <p>score): 6; Mean age (all study participants): 72.5 years; Gender (% of male among all study participants): 46.6%</p> <p><b>Socioeconomic status of participants in the whole group (relevant for meta-regression)</b><br/>No data relevant for meta-regression</p> <p><b>Race/Ethnicity of participants in the whole group (relevant for meta-regression)</b><br/>Caucasian race 83.66%</p> <p><b>Type and prevalence of medical comorbidities in the whole group (relevant for meta-regression)</b><br/>Atrial Fibrillation 8.61%; COPD 3.09%; Diabetes 20.09%; Heart Failure 5.96%; Hypertension 66.23%; Myocardial Infarction 3.53%; Pneumonia 3.97%; Pulmonary Embolism 1.1%; Renal Failure 0.66%; Smoking 11.26%</p> <p><b>Type and prevalence of psychiatric comorbidities in the whole group (relevant for meta-regression)</b><br/>No data relevant for meta-regression</p> <p><b>Type of received medication (and percentage of receiving participants) in the whole group (relevant for meta-regression)</b><br/>No data relevant for meta-regression</p>                                                                                                                                                                                                                                                                                                                                                                                                                                                            |
| <b>Eriksson, 2010</b> | <p><b>General data</b><br/>Publication year: 2010; Country of study (categorical moderator): Sweden; Type of the study (categorical moderator): cross-sectional; Study temporality (categorical moderator): prospective; Study setting (categorical moderator): epidemiological population study; Method to establish the diagnosis of delirium (categorical moderator): accordance to criteria of DSM or ICD (any version); Method to establish the diagnosis of UTI (categorical moderator): diagnosis recorded in medical files; Quality of study (Newcastle-Ottawa scale total score): 6; Gender (% of male among all study participants): 0.0%</p> <p><b>Socioeconomic status of participants in the whole group (relevant for meta-regression)</b><br/>Institutional Care 49.48%</p> <p><b>Race/Ethnicity of participants in the whole group (relevant for meta-regression)</b><br/>No data relevant for meta-regression</p> <p><b>Type and prevalence of medical comorbidities in the whole group (relevant for meta-regression)</b><br/>Constipation 43.04%; Diabetes 15.19%; Falls 42.03%; Heart Failure 35.19%; Hip Fracture 10.63%; Stroke 10.63%; Urinary Catheter 1.77%;</p> <p><b>Type and prevalence of psychiatric comorbidities in the whole group (relevant for meta-regression)</b><br/>Dementia 49.62%; Depression 39.24%</p> <p><b>Type of received medication (and percentage of receiving participants) in the whole group (relevant for meta-regression)</b><br/>No data relevant for meta-regression</p> |
| <b>Eriksson, 2011</b> | <p><b>General data</b><br/>Publication year: 2011; Country of study (categorical moderator): Sweden; Type of the study (categorical moderator): cross-sectional; Study temporality (categorical moderator): prospective; Study setting (categorical moderator): epidemiological population study; Method to establish the diagnosis of delirium (categorical moderator): accordance to criteria of DSM or ICD (any version); Method to establish the diagnosis of UTI (categorical moderator): diagnosis recorded in medical files; Quality of study (Newcastle-Ottawa scale total score): 7; Mean age (all study participants): 90.6 years; Gender (% of male among all study participants): 0.0%</p>                                                                                                                                                                                                                                                                                                                                                                                                                                                                                                                                                                                                                                                                                                                                                                                                                            |

|                   |                                                                                                                                                                                                                                                                                                                                                                                                                                                                                                                                                                                                                                                                                                                                                                                                                                                                                                                                                                                                                                                                                                                                                                                                                                                                                                                                                                                                                                                                                                                                    |
|-------------------|------------------------------------------------------------------------------------------------------------------------------------------------------------------------------------------------------------------------------------------------------------------------------------------------------------------------------------------------------------------------------------------------------------------------------------------------------------------------------------------------------------------------------------------------------------------------------------------------------------------------------------------------------------------------------------------------------------------------------------------------------------------------------------------------------------------------------------------------------------------------------------------------------------------------------------------------------------------------------------------------------------------------------------------------------------------------------------------------------------------------------------------------------------------------------------------------------------------------------------------------------------------------------------------------------------------------------------------------------------------------------------------------------------------------------------------------------------------------------------------------------------------------------------|
|                   | <p><b>Socioeconomic status of participants in the whole group (relevant for meta-regression)</b><br/>Institutional Care 47.22%</p> <p><b>Race/Ethnicity of participants in the whole group (relevant for meta-regression)</b><br/>No data relevant for meta-regression</p> <p><b>Type and prevalence of medical comorbidities in the whole group (relevant for meta-regression)</b><br/>Constipation 42.66%; Heart Failure 32.94%; Hypertension 63.49%; Stroke 1.59%; Urinary Catheter 1.79%;</p> <p><b>Type and prevalence of psychiatric comorbidities in the whole group (relevant for meta-regression)</b><br/>Dementia 46.43%; Depression 37.9%</p> <p><b>Type of received medication (and percentage of receiving participants) in the whole group (relevant for meta-regression)</b><br/>No data relevant for meta-regression</p>                                                                                                                                                                                                                                                                                                                                                                                                                                                                                                                                                                                                                                                                                           |
| <b>Gau, 2009</b>  | <p><b>General data</b><br/>Publication year: 2009; Country of study (categorical moderator): USA; Type of the study (categorical moderator): case-control; Study temporality (categorical moderator): retrospective; Study setting (categorical moderator): clinical; Method to establish the diagnosis of delirium (categorical moderator): diagnosis recorded in medical files; Method to establish the diagnosis of UTI (categorical moderator): microbiological urine tests and presence of UTI symptoms; Quality of study (Newcastle-Ottawa scale total score): 6; Mean age (all study participants): 82.4 years; Gender (% of male among all study participants): 22.0%</p> <p><b>Socioeconomic status of participants in the whole group (relevant for meta-regression)</b><br/>Institutional Care 36.18%</p> <p><b>Race/Ethnicity of participants in the whole group (relevant for meta-regression)</b><br/>No data relevant for meta-regression</p> <p><b>Type and prevalence of medical comorbidities in the whole group (relevant for meta-regression)</b><br/>Diabetes 18.7%; Falls 17.89%; Hypertension 52.85%; Pneumonia 15.04%; Stroke 22.76%; Urinary Catheter 43.9%</p> <p><b>Type and prevalence of psychiatric comorbidities in the whole group (relevant for meta-regression)</b><br/>No data relevant for meta-regression</p> <p><b>Type of received medication (and percentage of receiving participants) in the whole group (relevant for meta-regression)</b><br/>No data relevant for meta-regression</p> |
| <b>Gual, 2018</b> | <p><b>General data</b><br/>Publication year: 2018; Country of study (categorical moderator): Spain; Type of the study (categorical moderator): cohort; Study temporality (categorical moderator): prospective; Study setting (categorical moderator): clinical; Method to establish the diagnosis of delirium (categorical moderator): scales accordance to criteria of DSM or ICD (any version); Method to establish the diagnosis of UTI (categorical moderator): diagnosis recorded in medical files; Quality of study (Newcastle-Ottawa scale total score): 6; Mean age (all study participants): 85.8 years; Gender (% of male among all study participants): 39.9%</p> <p><b>Socioeconomic status of participants in the whole group (relevant for meta-regression)</b></p>                                                                                                                                                                                                                                                                                                                                                                                                                                                                                                                                                                                                                                                                                                                                                  |

|                                |                                                                                                                                                                                                                                                                                                                                                                                                                                                                                                                                                                                                                                                                                                                                                                                                                                                                                                                                                                                                                                                                                                                                                                                                                                                                                                                                                                                                                                                     |
|--------------------------------|-----------------------------------------------------------------------------------------------------------------------------------------------------------------------------------------------------------------------------------------------------------------------------------------------------------------------------------------------------------------------------------------------------------------------------------------------------------------------------------------------------------------------------------------------------------------------------------------------------------------------------------------------------------------------------------------------------------------------------------------------------------------------------------------------------------------------------------------------------------------------------------------------------------------------------------------------------------------------------------------------------------------------------------------------------------------------------------------------------------------------------------------------------------------------------------------------------------------------------------------------------------------------------------------------------------------------------------------------------------------------------------------------------------------------------------------------------|
|                                | <p>Institutional Care 24.2%</p> <p><b>Race/Ethnicity of participants in the whole group (relevant for meta-regression)</b><br/>No data relevant for meta-regression</p> <p><b>Type and prevalence of medical comorbidities in the whole group (relevant for meta-regression)</b><br/>COPD 37.18%; Diabetes 33.66%; Heart Failure 49.39%; Malnutrition 40.7%</p> <p><b>Type and prevalence of psychiatric comorbidities in the whole group (relevant for meta-regression)</b><br/>Dementia 43.78%</p> <p><b>Type of received medication (and percentage of receiving participants) in the whole group (relevant for meta-regression)</b><br/>No data relevant for meta-regression</p>                                                                                                                                                                                                                                                                                                                                                                                                                                                                                                                                                                                                                                                                                                                                                                |
| <p><b>Jitapunkul, 1992</b></p> | <p><b>General data</b><br/>Publication year: 1992; Country of study (categorical moderator): United Kingdom; Type of the study (categorical moderator): cohort; Study temporality (categorical moderator): prospective; Study setting (categorical moderator): clinical; Method to establish the diagnosis of delirium (categorical moderator): accordance to criteria of DSM or ICD (any version); Method to establish the diagnosis of UTI (categorical moderator): diagnosis recorded in medical files; Quality of study (Newcastle-Ottawa scale total score): 6; Mean age (all study participants): 81.7 years; Gender (% of male among all study participants): 40.8%</p> <p><b>Socioeconomic status of participants in the whole group (relevant for meta-regression)</b><br/>No data relevant for meta-regression</p> <p><b>Race/Ethnicity of participants in the whole group (relevant for meta-regression)</b><br/>No data relevant for meta-regression</p> <p><b>Type and prevalence of medical comorbidities in the whole group (relevant for meta-regression)</b><br/>COPD 5.43%; Pneumonia 3.8%; Stroke 12.5%</p> <p><b>Type and prevalence of psychiatric comorbidities in the whole group (relevant for meta-regression)</b><br/>Dementia 17.93%</p> <p><b>Type of received medication (and percentage of receiving participants) in the whole group (relevant for meta-regression)</b><br/>No data relevant for meta-regression</p> |
| <p><b>Khurana, 2002</b></p>    | <p><b>General data</b><br/>Publication year: 2002; Country of study (categorical moderator): India; Type of the study (categorical moderator): cohort; Study temporality (categorical moderator): prospective; Study setting (categorical moderator): clinical; Method to establish the diagnosis of delirium (categorical moderator): accordance to criteria of DSM or ICD (any version); Method to establish the diagnosis of UTI (categorical moderator): diagnosis recorded in medical files; Quality of study (Newcastle-Ottawa scale total score): 6; Mean age (all study participants): 71.3 years; Gender (% of male among all study participants): 64.0%</p> <p><b>Socioeconomic status of participants in the whole group (relevant for meta-regression)</b><br/>No data relevant for meta-regression</p> <p><b>Race/Ethnicity of participants in the whole group (relevant for meta-regression)</b><br/>No data relevant for meta-regression</p>                                                                                                                                                                                                                                                                                                                                                                                                                                                                                         |

|                        |                                                                                                                                                                                                                                                                                                                                                                                                                                                                                                                                                                                                                                                                                                                                                                                                                                                                                                                                                                                                                                                                                                                                                                                                                                                                                                                                                                                                                             |
|------------------------|-----------------------------------------------------------------------------------------------------------------------------------------------------------------------------------------------------------------------------------------------------------------------------------------------------------------------------------------------------------------------------------------------------------------------------------------------------------------------------------------------------------------------------------------------------------------------------------------------------------------------------------------------------------------------------------------------------------------------------------------------------------------------------------------------------------------------------------------------------------------------------------------------------------------------------------------------------------------------------------------------------------------------------------------------------------------------------------------------------------------------------------------------------------------------------------------------------------------------------------------------------------------------------------------------------------------------------------------------------------------------------------------------------------------------------|
|                        | <p><b>Type and prevalence of medical comorbidities in the whole group (relevant for meta-regression)</b><br/>Impaired Hearing 32%; Impaired Vision 46%</p> <p><b>Type and prevalence of psychiatric comorbidities in the whole group (relevant for meta-regression)</b><br/>No data relevant for meta-regression</p> <p><b>Type of received medication (and percentage of receiving participants) in the whole group (relevant for meta-regression)</b><br/>No data relevant for meta-regression</p>                                                                                                                                                                                                                                                                                                                                                                                                                                                                                                                                                                                                                                                                                                                                                                                                                                                                                                                        |
| <b>Kobayashi, 2017</b> | <p><b>General data</b><br/>Publication year: 2017; Country of study (categorical moderator): Japan; Type of the study (categorical moderator): cohort; Study temporality (categorical moderator): retrospective; Study setting (categorical moderator): clinical; Method to establish the diagnosis of delirium (categorical moderator): diagnosis recorded in medical files; Method to establish the diagnosis of UTI (categorical moderator): diagnosis recorded in medical files; Quality of study (Newcastle-Ottawa scale total score): 5; Mean age (all study participants): 82.7 years; Gender (% of male among all study participants): 46.6%</p> <p><b>Socioeconomic status of participants in the whole group (relevant for meta-regression)</b><br/>No data relevant for meta-regression</p> <p><b>Race/Ethnicity of participants in the whole group (relevant for meta-regression)</b><br/>No data relevant for meta-regression</p> <p><b>Type and prevalence of medical comorbidities in the whole group (relevant for meta-regression)</b><br/>Diabetes 15.27%; Hypertension 43.51%; Smoking 1.53%; Stroke 1.15%</p> <p><b>Type and prevalence of psychiatric comorbidities in the whole group (relevant for meta-regression)</b><br/>Dementia 0%</p> <p><b>Type of received medication (and percentage of receiving participants) in the whole group (relevant for meta-regression)</b><br/>Opioids 5.73%</p> |
| <b>Large, 2013</b>     | <p><b>General data</b><br/>Publication year: 2013; Country of study (categorical moderator): USA; Type of the study (categorical moderator): cohort; Study temporality (categorical moderator): prospective; Study setting (categorical moderator): clinical; Method to establish the diagnosis of delirium (categorical moderator): scales accordance to criteria of DSM or ICD (any version); Method to establish the diagnosis of UTI (categorical moderator): diagnosis recorded in medical files; Quality of study (Newcastle-Ottawa scale total score): 6; Gender (% of male among all study participants): 81.6%</p> <p><b>Socioeconomic status of participants in the whole group (relevant for meta-regression)</b><br/>Independent Living 97.96%</p> <p><b>Race/Ethnicity of participants in the whole group (relevant for meta-regression)</b><br/>Caucasian race 79.59%</p> <p><b>Type and prevalence of medical comorbidities in the whole group (relevant for meta-regression)</b><br/>No data relevant for meta-regression</p> <p><b>Type and prevalence of psychiatric comorbidities in the whole group (relevant for meta-regression)</b></p>                                                                                                                                                                                                                                                              |



|                        |                                                                                                                                                                                                                                                                                                                                                                                                                                                                                                                                                                                                                                                                                                                                                                                                                                                                                                                                                                                                                                                                                                                                                                                                                                                                                                                                                                                                                                                                                                                                                                     |
|------------------------|---------------------------------------------------------------------------------------------------------------------------------------------------------------------------------------------------------------------------------------------------------------------------------------------------------------------------------------------------------------------------------------------------------------------------------------------------------------------------------------------------------------------------------------------------------------------------------------------------------------------------------------------------------------------------------------------------------------------------------------------------------------------------------------------------------------------------------------------------------------------------------------------------------------------------------------------------------------------------------------------------------------------------------------------------------------------------------------------------------------------------------------------------------------------------------------------------------------------------------------------------------------------------------------------------------------------------------------------------------------------------------------------------------------------------------------------------------------------------------------------------------------------------------------------------------------------|
|                        | <p>No data relevant for meta-regression</p> <p><b>Type of received medication (and percentage of receiving participants) in the whole group (relevant for meta-regression)</b><br/>No data relevant for meta-regression</p>                                                                                                                                                                                                                                                                                                                                                                                                                                                                                                                                                                                                                                                                                                                                                                                                                                                                                                                                                                                                                                                                                                                                                                                                                                                                                                                                         |
| <b>Lundström, 2004</b> | <p><b>General data</b><br/>Publication year: 2004; Country of study (categorical moderator): Sweden; Type of the study (categorical moderator): 3; Study temporality (categorical moderator): prospective; Study setting (categorical moderator): clinical; Method to establish the diagnosis of delirium (categorical moderator): accordance to criteria of DSM or ICD (any version); Method to establish the diagnosis of UTI (categorical moderator): diagnosis recorded in medical files; Quality of study (Newcastle-Ottawa scale total score): 6; Mean age (all study participants): 82.0 years; Gender (% of male among all study participants): 23.7%</p> <p><b>Socioeconomic status of participants in the whole group (relevant for meta-regression)</b><br/>Independent Living 62.5%</p> <p><b>Race/Ethnicity of participants in the whole group (relevant for meta-regression)</b><br/>No data relevant for meta-regression</p> <p><b>Type and prevalence of medical comorbidities in the whole group (relevant for meta-regression)</b><br/>Anemia 82.29%; Constipation 48.96%; Falls 27.08%; Heart Failure 11.46%; Hip Fracture 100%; Myocardial Infarction 4.17%; Pneumonia 3.13%; Stroke 1.04%; Urinary Retention 18.75%</p> <p><b>Type and prevalence of psychiatric comorbidities in the whole group (relevant for meta-regression)</b><br/>Depression 55.21%</p> <p><b>Type of received medication (and percentage of receiving participants) in the whole group (relevant for meta-regression)</b><br/>No data relevant for meta-regression</p> |
| <b>Lundström, 2005</b> | <p><b>General data</b><br/>Publication year: 2005; Country of study (categorical moderator): Sweden; Type of the study (categorical moderator): 3; Study temporality (categorical moderator): prospective; Study setting (categorical moderator): clinical; Method to establish the diagnosis of delirium (categorical moderator): accordance to criteria of DSM or ICD (any version); Method to establish the diagnosis of UTI (categorical moderator): diagnosis recorded in medical files; Quality of study (Newcastle-Ottawa scale total score): 6; Mean age (all study participants): 80.7 years; Gender (% of male among all study participants): 49.5%</p> <p><b>Socioeconomic status of participants in the whole group (relevant for meta-regression)</b><br/>Independent Living 88%</p> <p><b>Race/Ethnicity of participants in the whole group (relevant for meta-regression)</b><br/>No data relevant for meta-regression</p> <p><b>Type and prevalence of medical comorbidities in the whole group (relevant for meta-regression)</b><br/>Diabetes 23.5%; Heart Failure 25.5%; Impaired Hearing 4%; Impaired Vision 17.5%; Malignancy 13%; Myocardial Infarction 4.5%; Stroke 25%</p> <p><b>Type and prevalence of psychiatric comorbidities in the whole group (relevant for meta-regression)</b><br/>Dementia 4.5%</p>                                                                                                                                                                                                                               |

|                          |                                                                                                                                                                                                                                                                                                                                                                                                                                                                                                                                                                                                                                                                                                                                                                                                                                                                                                                                                                                                                                                                                                                                                                                                                                                                                                                                                                                                                                                     |
|--------------------------|-----------------------------------------------------------------------------------------------------------------------------------------------------------------------------------------------------------------------------------------------------------------------------------------------------------------------------------------------------------------------------------------------------------------------------------------------------------------------------------------------------------------------------------------------------------------------------------------------------------------------------------------------------------------------------------------------------------------------------------------------------------------------------------------------------------------------------------------------------------------------------------------------------------------------------------------------------------------------------------------------------------------------------------------------------------------------------------------------------------------------------------------------------------------------------------------------------------------------------------------------------------------------------------------------------------------------------------------------------------------------------------------------------------------------------------------------------|
|                          | <p><b>Type of received medication (and percentage of receiving participants) in the whole group (relevant for meta-regression)</b><br/>Benzodiazepines 7%; Diuretics 60%; Neuroleptics 9%</p>                                                                                                                                                                                                                                                                                                                                                                                                                                                                                                                                                                                                                                                                                                                                                                                                                                                                                                                                                                                                                                                                                                                                                                                                                                                       |
| <b>Marcantonio, 2005</b> | <p><b>General data</b><br/>Publication year: 2005; Country of study (categorical moderator): USA; Type of the study (categorical moderator): cohort; Study temporality (categorical moderator): prospective; Study setting (categorical moderator): nursing home; Method to establish the diagnosis of delirium (categorical moderator): scales accordance to criteria of DSM or ICD (any version); Method to establish the diagnosis of UTI (categorical moderator): diagnosis recorded in medical files; Quality of study (Newcastle-Ottawa scale total score): 6; Mean age (all study participants): 82.0 years; Gender (% of male among all study participants): 67.1%</p> <p><b>Socioeconomic status of participants in the whole group (relevant for meta-regression)</b><br/>No data relevant for meta-regression</p> <p><b>Race/Ethnicity of participants in the whole group (relevant for meta-regression)</b><br/>Caucasian race 71.32%</p> <p><b>Type and prevalence of medical comorbidities in the whole group (relevant for meta-regression)</b><br/>Dehydration 4.26%; Heart Failure 4.65%; Pneumonia 7.75%</p> <p><b>Type and prevalence of psychiatric comorbidities in the whole group (relevant for meta-regression)</b><br/>Dementia 16.67%</p> <p><b>Type of received medication (and percentage of receiving participants) in the whole group (relevant for meta-regression)</b><br/>No data relevant for meta-regression</p> |
| <b>Morandi, 2019</b>     | <p><b>General data</b><br/>Publication year: 2019; Country of study (categorical moderator): Italy; Type of the study (categorical moderator): cohort; Study temporality (categorical moderator): retrospective; Study setting (categorical moderator): clinical; Method to establish the diagnosis of delirium (categorical moderator): scales accordance to criteria of DSM or ICD (any version); Method to establish the diagnosis of UTI (categorical moderator): diagnosis recorded in medical files; Quality of study (Newcastle-Ottawa scale total score): 6; Mean age (all study participants): 82.9 years; Gender (% of male among all study participants): 20.8%</p> <p><b>Socioeconomic status of participants in the whole group (relevant for meta-regression)</b><br/>No data relevant for meta-regression</p> <p><b>Race/Ethnicity of participants in the whole group (relevant for meta-regression)</b><br/>No data relevant for meta-regression</p> <p><b>Type and prevalence of medical comorbidities in the whole group (relevant for meta-regression)</b><br/>Falls 10.02%; Malnutrition 29.48;</p> <p><b>Type and prevalence of psychiatric comorbidities in the whole group (relevant for meta-regression)</b><br/>Dementia 17.34%</p> <p><b>Type of received medication (and percentage of receiving participants) in the whole group (relevant for meta-regression)</b><br/>No data relevant for meta-regression</p>        |
| <b>Olofsson, 2005</b>    | <p><b>General data</b></p>                                                                                                                                                                                                                                                                                                                                                                                                                                                                                                                                                                                                                                                                                                                                                                                                                                                                                                                                                                                                                                                                                                                                                                                                                                                                                                                                                                                                                          |

|                        |                                                                                                                                                                                                                                                                                                                                                                                                                                                                                                                                                                                                                                                                                                                                                                                                                                                                                                                                                                                                                                                                                                                                                                                                                                                                                                                                                                                                                                                                                                                                                                                                                                                                          |
|------------------------|--------------------------------------------------------------------------------------------------------------------------------------------------------------------------------------------------------------------------------------------------------------------------------------------------------------------------------------------------------------------------------------------------------------------------------------------------------------------------------------------------------------------------------------------------------------------------------------------------------------------------------------------------------------------------------------------------------------------------------------------------------------------------------------------------------------------------------------------------------------------------------------------------------------------------------------------------------------------------------------------------------------------------------------------------------------------------------------------------------------------------------------------------------------------------------------------------------------------------------------------------------------------------------------------------------------------------------------------------------------------------------------------------------------------------------------------------------------------------------------------------------------------------------------------------------------------------------------------------------------------------------------------------------------------------|
|                        | <p>Publication year: 2005; Country of study (categorical moderator): Sweden; Type of the study (categorical moderator): cohort; Study temporality (categorical moderator): prospective; Study setting (categorical moderator): clinical; Method to establish the diagnosis of delirium (categorical moderator): accordance to criteria of DSM or ICD (any version); Method to establish the diagnosis of UTI (categorical moderator): diagnosis recorded in medical files; Quality of study (Newcastle-Ottawa scale total score): 6; Mean age (all study participants): 82.6 years; Gender (% of male among all study participants): 34.4%</p> <p><b>Socioeconomic status of participants in the whole group (relevant for meta-regression)</b><br/>Institutional Care 34.43%; Independent Living 65.57%</p> <p><b>Race/Ethnicity of participants in the whole group (relevant for meta-regression)</b><br/>No data relevant for meta-regression</p> <p><b>Type and prevalence of medical comorbidities in the whole group (relevant for meta-regression)</b><br/>Anemia 96.72%; Constipation 47.54%; Dehydration 13.11%; Diabetes 24.59%; Falls 18.03%; Heart Failure 21.31%; Hip Fracture 100%; Hypertension 40.98%; Impaired Hearing 47.54%; Impaired Vision 57.38%; Urinary Retention 9.84%;</p> <p><b>Type and prevalence of psychiatric comorbidities in the whole group (relevant for meta-regression)</b><br/>Dementia 32.79%; Depression 34.43%</p> <p><b>Type of received medication (and percentage of receiving participants) in the whole group (relevant for meta-regression)</b><br/>Anti Depressant 31.15%; Benzodiazepines 29.51%; Diuretics 42.62%</p> |
| <b>Olofsson, 2018</b>  | <p><b>General data</b><br/>Publication year: 2018; Country of study (categorical moderator): Sweden; Type of the study (categorical moderator): cohort; Study temporality (categorical moderator): prospective; Study setting (categorical moderator): clinical; Method to establish the diagnosis of delirium (categorical moderator): accordance to criteria of DSM or ICD (any version); Method to establish the diagnosis of UTI (categorical moderator): diagnosis recorded in medical files; Quality of study (Newcastle-Ottawa scale total score): 6; Mean age (all study participants): 82.2 years; Gender (% of male among all study participants): 25.2%</p> <p><b>Socioeconomic status of participants in the whole group (relevant for meta-regression)</b><br/>Independent Living 81.34%</p> <p><b>Race/Ethnicity of participants in the whole group (relevant for meta-regression)</b><br/>No data relevant for meta-regression</p> <p><b>Type and prevalence of medical comorbidities in the whole group (relevant for meta-regression)</b><br/>Constipation 42.54%; Diabetes 20.15%; Falls 18.03%; Hip Fracture 100%; Hypertension 45.52%; Impaired Hearing 44.78%; Impaired Vision 35.82%; Urinary Retention 17.91%;</p> <p><b>Type and prevalence of psychiatric comorbidities in the whole group (relevant for meta-regression)</b><br/>Dementia 0%; Depression 29.85%</p> <p><b>Type of received medication (and percentage of receiving participants) in the whole group (relevant for meta-regression)</b><br/>Anti Depressant 24.63%; Neuroleptics 5.22%</p>                                                                                      |
| <b>Perez-Ros, 2018</b> | <b>General data</b>                                                                                                                                                                                                                                                                                                                                                                                                                                                                                                                                                                                                                                                                                                                                                                                                                                                                                                                                                                                                                                                                                                                                                                                                                                                                                                                                                                                                                                                                                                                                                                                                                                                      |

|                       |                                                                                                                                                                                                                                                                                                                                                                                                                                                                                                                                                                                                                                                                                                                                                                                                                                                                                                                                                                                                                                                                                                                                                                                                                                                                                                                                                                                                                                                                                                                                                                                                                             |
|-----------------------|-----------------------------------------------------------------------------------------------------------------------------------------------------------------------------------------------------------------------------------------------------------------------------------------------------------------------------------------------------------------------------------------------------------------------------------------------------------------------------------------------------------------------------------------------------------------------------------------------------------------------------------------------------------------------------------------------------------------------------------------------------------------------------------------------------------------------------------------------------------------------------------------------------------------------------------------------------------------------------------------------------------------------------------------------------------------------------------------------------------------------------------------------------------------------------------------------------------------------------------------------------------------------------------------------------------------------------------------------------------------------------------------------------------------------------------------------------------------------------------------------------------------------------------------------------------------------------------------------------------------------------|
|                       | <p>Publication year: 2018; Country of study (categorical moderator): Spain; Type of the study (categorical moderator): case-control; Study temporality (categorical moderator): retrospective; Study setting (categorical moderator): nursing home; Method to establish the diagnosis of delirium (categorical moderator): both DSM or ICD criteria (any version) and validated rating scales; Method to establish the diagnosis of UTI (categorical moderator): diagnosis recorded in medical files; Quality of study (Newcastle-Ottawa scale total score): 6; Mean age (all study participants): 86.0 years; Gender (% of male among all study participants): 24.7%</p> <p><b>Socioeconomic status of participants in the whole group (relevant for meta-regression)</b><br/>Institutional Care 100%</p> <p><b>Race/Ethnicity of participants in the whole group (relevant for meta-regression)</b><br/>No data relevant for meta-regression</p> <p><b>Type and prevalence of medical comorbidities in the whole group (relevant for meta-regression)</b><br/>Anemia 24.51%; COPD 7.52%; Hip Fracture 20.92%; Impaired Hearing 16.34%; Impaired Vision 53.59%; Renal Failure 16.34%; Stroke 18.3%; Urinary Catheter 1.31%</p> <p><b>Type and prevalence of psychiatric comorbidities in the whole group (relevant for meta-regression)</b><br/>Dementia 54.9%; Depression 33.33%</p> <p><b>Type of received medication (and percentage of receiving participants) in the whole group (relevant for meta-regression)</b><br/>Anti Depressant 34.31%; Drugs with anticholinergic properties 22.22%; Neuroleptics 25.16%</p> |
| <b>Raats, 2015</b>    | <p><b>General data</b><br/>Publication year: 2015; Country of study (categorical moderator): Netherlands; Type of the study (categorical moderator): cohort; Study temporality (categorical moderator): prospective; Study setting (categorical moderator): clinical; Method to establish the diagnosis of delirium (categorical moderator): both DSM or ICD criteria (any version) and validated rating scales; Method to establish the diagnosis of UTI (categorical moderator): diagnosis recorded in medical files; Quality of study (Newcastle-Ottawa scale total score): 6; Gender (% of male among all study participants): 63.8%</p> <p><b>Socioeconomic status of participants in the whole group (relevant for meta-regression)</b><br/>Institutional Care 3.02%</p> <p><b>Race/Ethnicity of participants in the whole group (relevant for meta-regression)</b><br/>No data relevant for meta-regression</p> <p><b>Type and prevalence of medical comorbidities in the whole group (relevant for meta-regression)</b><br/>Anemia 55.17%; Hypertension 50.86%; Impaired Hearing 29.74%; Impaired Vision 29.31%; Malignancy 78.02%; Smoking 16.38%; Urinary Retention 3.88%</p> <p><b>Type and prevalence of psychiatric comorbidities in the whole group (relevant for meta-regression)</b><br/>No data relevant for meta-regression</p> <p><b>Type of received medication (and percentage of receiving participants) in the whole group (relevant for meta-regression)</b><br/>No data relevant for meta-regression</p>                                                                                           |
| <b>Sandberg, 1999</b> | <b>General data</b>                                                                                                                                                                                                                                                                                                                                                                                                                                                                                                                                                                                                                                                                                                                                                                                                                                                                                                                                                                                                                                                                                                                                                                                                                                                                                                                                                                                                                                                                                                                                                                                                         |

|                                       |                                                                                                                                                                                                                                                                                                                                                                                                                                                                                                                                                                                                                                                                                                                                                                                                                                                                                                                                                                                                                                                                                                                                                                                                                                                                                                                                                                                                                                                                                                                                                                                                             |
|---------------------------------------|-------------------------------------------------------------------------------------------------------------------------------------------------------------------------------------------------------------------------------------------------------------------------------------------------------------------------------------------------------------------------------------------------------------------------------------------------------------------------------------------------------------------------------------------------------------------------------------------------------------------------------------------------------------------------------------------------------------------------------------------------------------------------------------------------------------------------------------------------------------------------------------------------------------------------------------------------------------------------------------------------------------------------------------------------------------------------------------------------------------------------------------------------------------------------------------------------------------------------------------------------------------------------------------------------------------------------------------------------------------------------------------------------------------------------------------------------------------------------------------------------------------------------------------------------------------------------------------------------------------|
|                                       | <p>Publication year: 1999; Country of study (categorical moderator): Sweden; Type of the study (categorical moderator): cross-sectional; Study temporality (categorical moderator): prospective; Study setting (categorical moderator): mixed; Method to establish the diagnosis of delirium (categorical moderator): accordance to criteria of DSM or ICD (any version); Method to establish the diagnosis of UTI (categorical moderator): diagnosis recorded in medical files; Quality of study (Newcastle-Ottawa scale total score): 6; Mean age (all study participants): 83.7 years; Gender (% of male among all study participants): 55.4%</p> <p><b>Socioeconomic status of participants in the whole group (relevant for meta-regression)</b><br/>Institutional Care 55.51%</p> <p><b>Race/Ethnicity of participants in the whole group (relevant for meta-regression)</b><br/>No data relevant for meta-regression</p> <p><b>Type and prevalence of medical comorbidities in the whole group (relevant for meta-regression)</b><br/>Atrial Fibrillation 10.88%; Impaired Hearing 46.16%; Impaired Vision 60.25%; Myocardial Infarction 1.95%; Pneumonia 1.12%; Stroke 5.3%; Urinary Catheter 4.6%; Urinary Retention 1.53%</p> <p><b>Type and prevalence of psychiatric comorbidities in the whole group (relevant for meta-regression)</b><br/>Dementia 33.19%; Depression 6.28%</p> <p><b>Type of received medication (and percentage of receiving participants) in the whole group (relevant for meta-regression)</b><br/>Drugs with anticholinergic properties 32.22%; Neuroleptics 22.18%</p> |
| <p><b>Schuurmans, 2003</b></p>        | <p><b>General data</b><br/>Publication year: 2003; Country of study (categorical moderator): Netherlands; Type of the study (categorical moderator): cohort; Study temporality (categorical moderator): prospective; Study setting (categorical moderator): clinical; Method to establish the diagnosis of delirium (categorical moderator): accordance to criteria of DSM or ICD (any version); Method to establish the diagnosis of UTI (categorical moderator): diagnosis recorded in medical files; Quality of study (Newcastle-Ottawa scale total score): 6; Mean age (all study participants): 82.7 years; Gender (% of male among all study participants): 13.0%</p> <p><b>Socioeconomic status of participants in the whole group (relevant for meta-regression)</b><br/>Institutional Care 31.52%; Independent Living 65.22%</p> <p><b>Race/Ethnicity of participants in the whole group (relevant for meta-regression)</b><br/>No data relevant for meta-regression</p> <p><b>Type and prevalence of medical comorbidities in the whole group (relevant for meta-regression)</b><br/>Dehydration 10.87%; Hip Fracture 100%; Malnutrition 3.26%; Urinary Catheter 85.87%</p> <p><b>Type and prevalence of psychiatric comorbidities in the whole group (relevant for meta-regression)</b><br/>No data relevant for meta-regression</p> <p><b>Type of received medication (and percentage of receiving participants) in the whole group (relevant for meta-regression)</b><br/>Opioids 81.52%</p>                                                                                                   |
| <p><b>Stroomer-Van Wijk, 2016</b></p> | <p><b>General data</b><br/>Publication year: 2016; Country of study (categorical moderator): Netherlands; Type of the study (categorical moderator): case-control; Study temporality (categorical</p>                                                                                                                                                                                                                                                                                                                                                                                                                                                                                                                                                                                                                                                                                                                                                                                                                                                                                                                                                                                                                                                                                                                                                                                                                                                                                                                                                                                                       |

|                             |                                                                                                                                                                                                                                                                                                                                                                                                                                                                                                                                                                                                                                                                                                                                                                                                                                                                                                                                                                                                                                                                                                                                                                                                                                                                                                                                                                                                                                                                                                                                          |
|-----------------------------|------------------------------------------------------------------------------------------------------------------------------------------------------------------------------------------------------------------------------------------------------------------------------------------------------------------------------------------------------------------------------------------------------------------------------------------------------------------------------------------------------------------------------------------------------------------------------------------------------------------------------------------------------------------------------------------------------------------------------------------------------------------------------------------------------------------------------------------------------------------------------------------------------------------------------------------------------------------------------------------------------------------------------------------------------------------------------------------------------------------------------------------------------------------------------------------------------------------------------------------------------------------------------------------------------------------------------------------------------------------------------------------------------------------------------------------------------------------------------------------------------------------------------------------|
|                             | <p>moderator): prospective; Study setting (categorical moderator): clinical; Method to establish the diagnosis of delirium (categorical moderator): accordance to criteria of DSM or ICD (any version); Method to establish the diagnosis of UTI (categorical moderator): diagnosis recorded in medical files; Quality of study (Newcastle-Ottawa scale total score): 6; Mean age (all study participants): 86.5 years; Gender (% of male among all study participants): 23.9%</p> <p><b>Socioeconomic status of participants in the whole group (relevant for meta-regression)</b><br/>Institutional Care 37.5%; Independent Living 62.5%</p> <p><b>Race/Ethnicity of participants in the whole group (relevant for meta-regression)</b><br/>No data relevant for meta-regression</p> <p><b>Type and prevalence of medical comorbidities in the whole group (relevant for meta-regression)</b><br/>Atrial Fibrillation 23.86%; COPD 12.5%; Dehydration 18.18%; Diabetes 18.18%; Falls 21.59%; Heart Failure 18.18%; Impaired Hearing 47.73%; Impaired Vision 44.32%; Malnutrition 20.45%; Myocardial Infarction 1.14%</p> <p><b>Type and prevalence of psychiatric comorbidities in the whole group (relevant for meta-regression)</b><br/>Dementia 77.27%</p> <p><b>Type of received medication (and percentage of receiving participants) in the whole group (relevant for meta-regression)</b><br/>Antidepressant 5.68%; Benzodiazepines 26.14%; Drugs with anticholinergic properties 67.05%; Neuroleptics 12.5%; Opioids 12.5%</p> |
| <p><b>Wojszel, 2018</b></p> | <p><b>General data</b><br/>Publication year: 2018; Country of study (categorical moderator): Poland; Type of the study (categorical moderator): cohort; Study temporality (categorical moderator): prospective; Study setting (categorical moderator): clinical; Method to establish the diagnosis of delirium (categorical moderator): scales accordance to criteria of DSM or ICD (any version); Method to establish the diagnosis of UTI (categorical moderator): microbiological urine tests and presence of UTI symptoms; Quality of study (Newcastle-Ottawa scale total score): 6; Gender (% of male among all study participants): 37.4%</p> <p><b>Socioeconomic status of participants in the whole group (relevant for meta-regression)</b><br/>No data relevant for meta-regression</p> <p><b>Race/Ethnicity of participants in the whole group (relevant for meta-regression)</b><br/>No data relevant for meta-regression</p> <p><b>Type and prevalence of medical comorbidities in the whole group (relevant for meta-regression)</b><br/>Heart Failure 61.9%; Renal Failure 39.51%; Stroke 13.99%; Urinary Catheter 2.8%</p> <p><b>Type and prevalence of psychiatric comorbidities in the whole group (relevant for meta-regression)</b><br/>Dementia 32.52%; Depression 53.5%</p> <p><b>Type of received medication (and percentage of receiving participants) in the whole group (relevant for meta-regression)</b><br/>No data relevant for meta-regression</p>                                                        |

**Supplementary Tables S7 – S12**  
**Results of a meta-regression with categorical moderators**

**Supplementary Table S7**  
**Results of a meta-regression with the country of study as a categorical moderator**

**Covariate: study country**

Number of studies: 29

Reference subgroup: USA (9 studies)

Q = 8.62; df = 12; p = 0.735

R<sup>2</sup> = 0.00

|                | Coefficient | Standard Error | 95% confidence interval |             | Z-value | 2-sided p-value | VIF   |
|----------------|-------------|----------------|-------------------------|-------------|---------|-----------------|-------|
|                |             |                | Lower limit             | Upper limit |         |                 |       |
| Intercept      | 0.941       | 0.261          | 0.429                   | 1.453       | 3.60    | 0.000           | 4.243 |
| Brazil         | 0.252       | 0.764          | -1.245                  | 1.750       | 0.33    | 0.741           | 1.097 |
| France         | -2.240      | 1.592          | -5.361                  | 0.880       | -1.41   | 0.159           | 1.021 |
| India          | 0.880       | 1.055          | -1.189                  | 2.948       | 0.83    | 0.405           | 1.049 |
| Italy          | 0.094       | 0.610          | -1.101                  | 1.288       | 0.15    | 0.878           | 1.160 |
| Japan          | 0.300       | 1.258          | -2.165                  | 2.765       | 0.24    | 0.812           | 1.034 |
| Netherlands    | 0.886       | 0.611          | -0.311                  | 2.083       | 1.45    | 0.147           | 1.159 |
| Peru           | -1.018      | 0.765          | -2.517                  | 0.481       | -1.33   | 0.183           | 1.097 |
| Poland         | -0.102      | 0.669          | -1.413                  | 1.209       | -0.15   | 0.879           | 1.130 |
| Portugal       | 0.111       | 0.608          | -1.080                  | 1.302       | 0.18    | 0.855           | 1.161 |
| Spain          | 0.058       | 0.466          | -0.855                  | 0.971       | 0.12    | 0.901           | 1.301 |
| Sweden         | -0.007      | 0.340          | -0.674                  | 0.660       | -0.02   | 0.983           | 1.612 |
| United Kingdom | 0.963       | 0.936          | -0.870                  | 2.797       | 1.03    | 0.303           | 1.063 |

**Supplementary Table S8**  
**Results of a meta-regression with the type of the study as a categorical moderator**

**Covariate: type of the study**

Number of studies: 29

Reference subgroup: cohort studies (19 studies)

Q = 4.58; df = 3; p = 0.205

R<sup>2</sup> = 0.00

|                         | Coefficient | Standard Error | 95% confidence interval |             | Z-value | 2-sided p-value | VIF   |
|-------------------------|-------------|----------------|-------------------------|-------------|---------|-----------------|-------|
|                         |             |                | Lower limit             | Upper limit |         |                 |       |
| Intercept               | 0.986       | 0.152          | 0.688                   | 1.284       | 6.49    | 0.000           | 1.629 |
| cross-sectional studies | -0.337      | 0.293          | -0.911                  | 0.236       | -1.15   | 0.249           | 1.059 |
| case-control studies    | 0.561       | 0.383          | -0.190                  | 1.313       | 1.46    | 0.143           | 1.051 |
| control groups in RCTs  | 0.261       | 0.577          | -0.869                  | 1.391       | 0.45    | 0.651           | 1.025 |

**Supplementary Table S9**  
**Results of a meta-regression with the study temporality as a categorical moderator**

**Covariate: study temporality**

Number of studies: 29

Reference subgroup: prospective studies (23 studies)

Q = 1.96; df = 1; p = 0.162

R<sup>2</sup> = 0.14

|                       | Coefficient | Standard Error | 95% confidence interval |             | Z-value | 2-sided p-value | VIF   |
|-----------------------|-------------|----------------|-------------------------|-------------|---------|-----------------|-------|
|                       |             |                | Lower limit             | Upper limit |         |                 |       |
| Intercept             | 0.885       | 0.130          | 0.631                   | 1.139       | 6.82    | 0.000           | 1.336 |
| retrospective studies | 0.362       | 0.259          | -0.145                  | 0.869       | 1.40    | 0.162           | 1.000 |

**Supplementary Table S10**  
**Results of a meta-regression with the study setting as a categorical moderator**

**Covariate: study setting**

Number of studies: 29

Reference subgroup: clinical samples (23 studies)

Q = 4.87; df = 3; p = 0.181

R<sup>2</sup> = 0.00

|                         | Coefficient | Standard Error | 95% confidence interval |             | Z-value | 2-sided p-value | VIF   |
|-------------------------|-------------|----------------|-------------------------|-------------|---------|-----------------|-------|
|                         |             |                | Lower limit             | Upper limit |         |                 |       |
| Intercept               | 1.161       | 0.149          | 0.870                   | 1.452       | 7.81    | 0.000           | 1.405 |
| nursing home samples    | -0.707      | 0.382          | -1.455                  | 0.041       | -1.85   | 0.064           | 1.029 |
| epidemiological samples | -0.375      | 0.406          | -1.172                  | 0.422       | -0.92   | 0.356           | 1.028 |
| mixed samples           | -0.704      | 0.572          | -1.826                  | 0.417       | -1.23   | 0.218           | 1.017 |

**Supplementary Table S11**  
**Results of a meta-regression**  
**with the method to establish the diagnosis of delirium as a categorical moderator**

**Covariate: method to establish the diagnosis of delirium**

Number of studies: 29

Reference subgroup: accordance to criteria of DSM or ICD (any version) (15 studies)

Q = 2.03; df = 3; p = 0.566

R<sup>2</sup> = 0.00

|                                                      | Coefficient | Standard Error | 95% confidence interval |             | Z-value | 2-sided p-value | VIF   |
|------------------------------------------------------|-------------|----------------|-------------------------|-------------|---------|-----------------|-------|
|                                                      |             |                | Lower limit             | Upper limit |         |                 |       |
| Intercept                                            | 1.150       | 0.175          | 0.808                   | 1.493       | 6.58    | 0.000           | 2.036 |
| validated rating scales                              | -0.391      | 0.279          | -0.938                  | 0.157       | -1.40   | 0.162           | 1.124 |
| both DSM or ICD criteria and validated rating scales | -0.278      | 0.488          | -1.235                  | 0.678       | -0.57   | 0.569           | 1.064 |
| diagnosis recorded in medical files                  | -0.135      | 0.394          | -0.907                  | 0.638       | -0.34   | 0.733           | 1.095 |



**Supplementary Table S12**  
**Results of a meta-regression**  
**with the method to establish the diagnosis of UTI as a categorical moderator**

**Covariate: method to establish the diagnosis of UTI**

Number of studies: 29

Reference subgroup: microbiological urine tests and presence of UTI symptoms (2 studies)

Q = 1.42; df = 1; p = 0.233

R<sup>2</sup> = 0.09

|                                     | Coefficient | Standard Error | 95% confidence interval |             | Z-value | 2-sided p-value | VIF    |
|-------------------------------------|-------------|----------------|-------------------------|-------------|---------|-----------------|--------|
|                                     |             |                | Lower limit             | Upper limit |         |                 |        |
| Intercept                           | 1,425       | 0,391          | 0,658                   | 2,191       | 3,64    | 0,000           | 11,747 |
| diagnosis recorded in medical files | -0,487      | 0,409          | -1,288                  | 0,314       | -1,19   | 0,233           | 1,000  |

**Supplementary Table S13**  
**Results of a meta-regression with numerical moderators**

| Covariate                                               | Number of studies | Coefficient  | Standard Error | 95% confidence interval |              | Z-value     | P-value      |
|---------------------------------------------------------|-------------------|--------------|----------------|-------------------------|--------------|-------------|--------------|
|                                                         |                   |              |                | Lower limit             | Upper limit  |             |              |
| Publication year                                        | 29                | 0.000        | 0.018          | -0.034                  | 0.035        | 0.03        | 0.978        |
| Quality of study (rating on the Newcastle-Ottawa Scale) | 29                | 0.269        | 0.266          | -0.253                  | 0.792        | 1,01        | 0.312        |
| Mean age                                                | 24                | -0.014       | 0.026          | -0.065                  | 0.038        | -0.52       | 0.603        |
| Gender (% of male)                                      | 29                | -0.000       | 0.006          | -0.012                  | 0.012        | -0.05       | 0.964        |
| Institutional care                                      | 10                | -0.011       | 0.007          | -0.026                  | 0.003        | -1.56       | 0.119        |
| Independent living                                      | 7                 | -0.024       | 0.020          | -0.063                  | 0.014        | -1.25       | 0.211        |
| Caucasian race                                          | 4                 | -0.016       | 0.058          | -0.130                  | 0.098        | -0.27       | 0.784        |
| Anemia                                                  | 4                 | 0.015        | 0.008          | 0.000                   | 0.030        | 1,93        | 0.053        |
| Atrial fibrillation                                     | 5                 | 0.015        | 0.057          | -0.096                  | 0.126        | 0.27        | 0.788        |
| Constipation                                            | 6                 | 0.015        | 0.015          | -0.014                  | 0.044        | 0.99        | 0.322        |
| COPD                                                    | 7                 | 0.012        | 0.023          | -0.033                  | 0.057        | 0.51        | 0.608        |
| <b>Dehydration</b>                                      | <b>5</b>          | <b>0.188</b> | <b>0.053</b>   | <b>0.084</b>            | <b>0.292</b> | <b>3.53</b> | <b>0.000</b> |
| Diabetes                                                | 13                | 0.007        | 0.034          | -0.059                  | 0.072        | 0.20        | 0.840        |
| Falls                                                   | 7                 | -0.032       | 0.033          | -0.096                  | 0.033        | -0.97       | 0.332        |
| Heart failure, unspecified                              | 14                | 0.006        | 0.009          | -0.011                  | 0.023        | 0.71        | 0.480        |
| Hip fracture                                            | 8                 | 0.005        | 0.005          | -0.006                  | 0.015        | 0.83        | 0.409        |
| Hypertension                                            | 11                | 0.009        | 0.010          | -0.011                  | 0.030        | 0.89        | 0.374        |
| Impaired hearing                                        | 8                 | 0.020        | 0.019          | -0.017                  | 0.057        | 1.06        | 0.291        |
| Impaired vision                                         | 8                 | -0.009       | 0.019          | -0.047                  | 0.028        | -0.49       | 0.623        |
| Malignancy                                              | 5                 | 0.001        | 0.012          | -0.021                  | 0.024        | 0.12        | 0.906        |
| Malnutrition                                            | 5                 | 0.022        | 0.019          | -0.016                  | 0.060        | 1.14        | 0.253        |
| Myocardial infarction                                   | 9                 | 0.039        | 0.128          | -0.212                  | 0.290        | 0.31        | 0.760        |
| Pneumonia                                               | 11                | 0.067        | 0.055          | -0.041                  | 0.176        | 1.22        | 0.223        |
| Pulmonary embolism                                      | 4                 | 1.166        | 1.031          | -0.854                  | 3.186        | 1.13        | 0.258        |
| Renal failure                                           | 7                 | 0.008        | 0.016          | -0.025                  | 0.040        | 0.46        | 0.645        |
| Smoking                                                 | 6                 | 0.028        | 0.068          | -0.106                  | 0.162        | 0.40        | 0.686        |
| Stroke                                                  | 14                | 0.004        | 0.005          | -0.006                  | 0.014        | 0.72        | 0.474        |
| <b>Urinary catheter</b>                                 | <b>8</b>          | <b>0.020</b> | <b>0.007</b>   | <b>0.005</b>            | <b>0.035</b> | <b>2.68</b> | <b>0.007</b> |
| <b>Urinary retention</b>                                | <b>6</b>          | <b>0.070</b> | <b>0.023</b>   | <b>0.024</b>            | <b>0.115</b> | <b>3.02</b> | <b>0.003</b> |
| Dementia                                                | 20                | 0.002        | 0.006          | -0.010                  | 0.015        | 0.34        | 0.735        |
| Depression                                              | 10                | 0.009        | 0.007          | -0.005                  | 0.023        | 1.30        | 0.192        |
| Antidepressants                                         | 5                 | -0.013       | 0.029          | -0.071                  | 0.044        | -0.46       | 0.646        |
| <b>Benzodiazepines</b>                                  | <b>5</b>          | <b>0.081</b> | <b>0.039</b>   | <b>0.004</b>            | <b>0.159</b> | <b>2.07</b> | <b>0.039</b> |
| Diuretics                                               | 4                 | 0.015        | 0.023          | -0.029                  | 0.060        | 0.67        | 0.504        |
| <b>Drugs with anticholinergic properties</b>            | <b>4</b>          | <b>0.043</b> | <b>0.022</b>   | <b>0.001</b>            | <b>0.086</b> | <b>2.02</b> | <b>0.043</b> |
| Neuroleptics                                            | 8                 | -0.003       | 0.030          | -0.061                  | 0.055        | -0.11       | 0.911        |
| Opioids                                                 | 6                 | -0.015       | 0.014          | -0.042                  | 0.012        | -1.07       | 0.283        |

## Supplementary Figures

### Supplementary Figure S1 Funnel plot: all studies

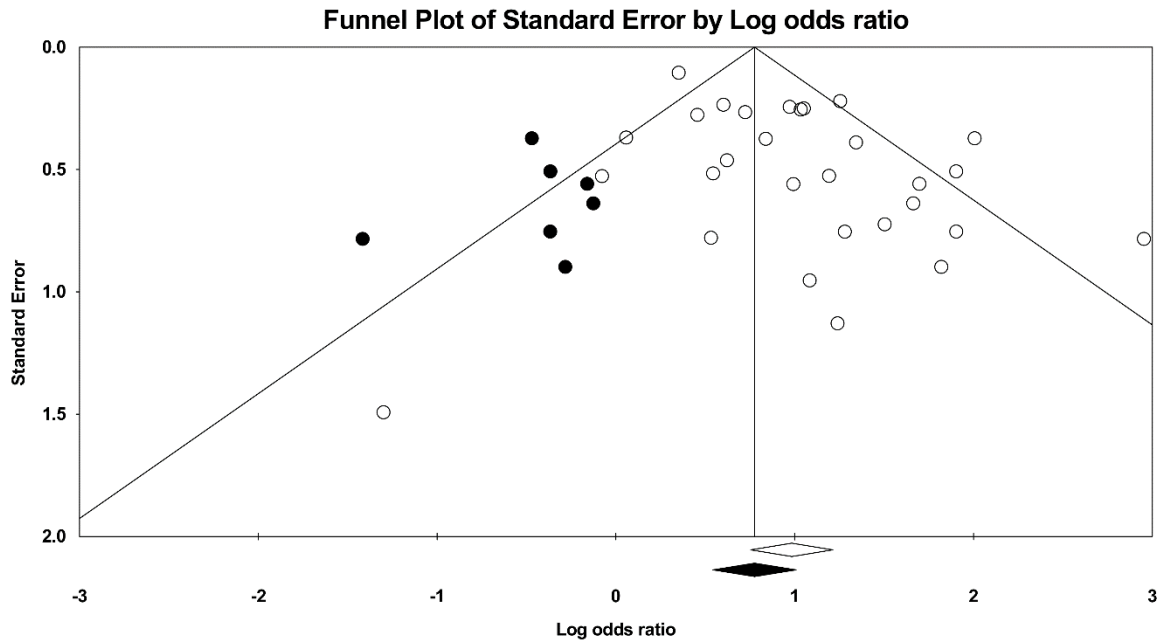

#### Duval and Tweedie's trim and fill

|                        | Fixed Effects   |                |             |             | Random Effects |             |             | Q Value   |
|------------------------|-----------------|----------------|-------------|-------------|----------------|-------------|-------------|-----------|
|                        | Studies Trimmed | Point Estimate | Lower Limit | Upper Limit | Point Estimate | Lower Limit | Upper Limit |           |
| <b>Observed values</b> |                 | 2.15918        | 1.91751     | 2.43132     | 2.67368        | 2.12455     | 3.36475     | 70.87269  |
| <b>Adjusted values</b> | 7               | 1.98100        | 1.76700     | 2.22092     | 2.17125        | 1.71948     | 2.74173     | 100.84741 |

#### Classic fail-safe N

|                                                               |            |
|---------------------------------------------------------------|------------|
| Z-value for observed studies                                  | 12.84648   |
| P-value for observed studies                                  | 0.00000    |
| Alpha                                                         | 0.05000    |
| Tails                                                         | 2.00000    |
| Z for alpha                                                   | 1.95996    |
| Number of observed studies                                    | 29.00000   |
| Number of missing studies that would bring p-value to > alpha | 1217.00000 |

#### Egger's regression intercept

|                            |          |
|----------------------------|----------|
| Intercept                  | 1.37227  |
| Standard error             | 0.46540  |
| 95% lower limit (2-tailed) | 0.41736  |
| 95% upper limit (2-tailed) | 2.32718  |
| t-value                    | 2.94861  |
| df                         | 27.00000 |
| P-value (1-tailed)         | 0.00326  |
| P-value (2-tailed)         | 0.00651  |

**Supplementary Figure S2**  
**Forest plot: After removing the study with the highest weight**

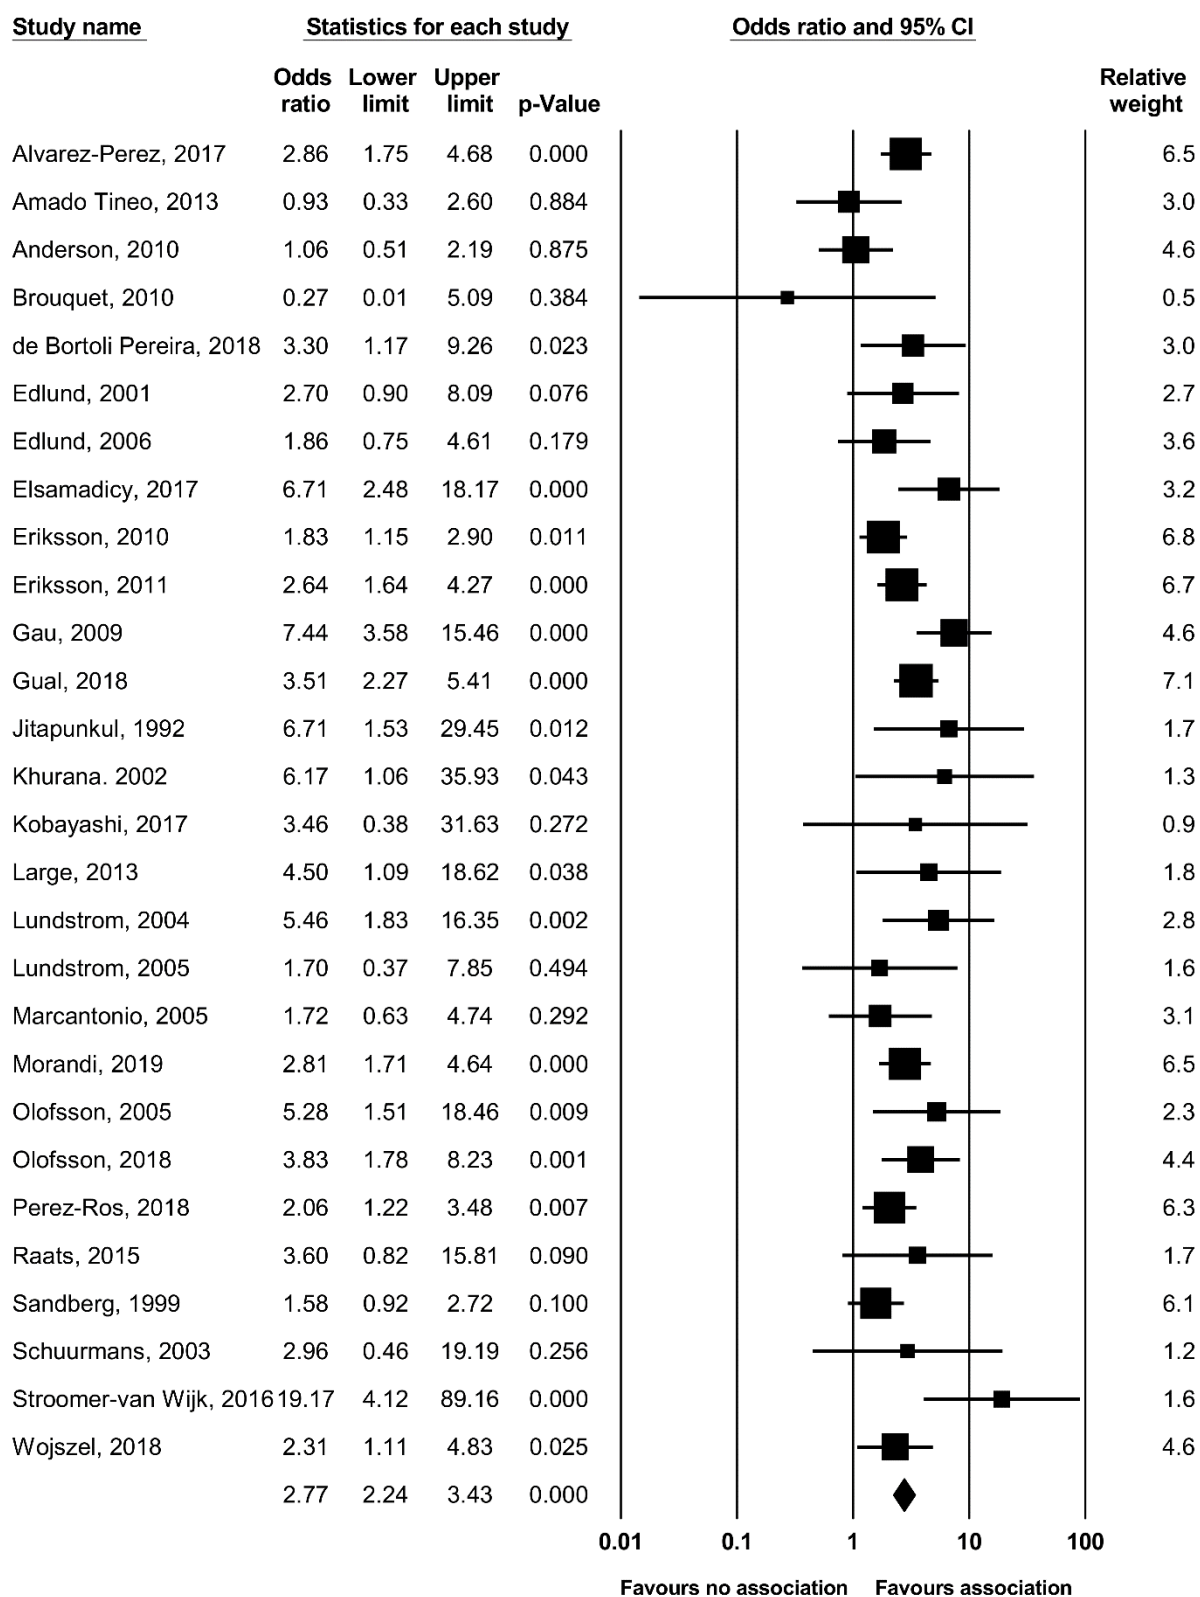

**Supplementary Figure S3**  
**Funnel plot: After removing the study with the highest weight**

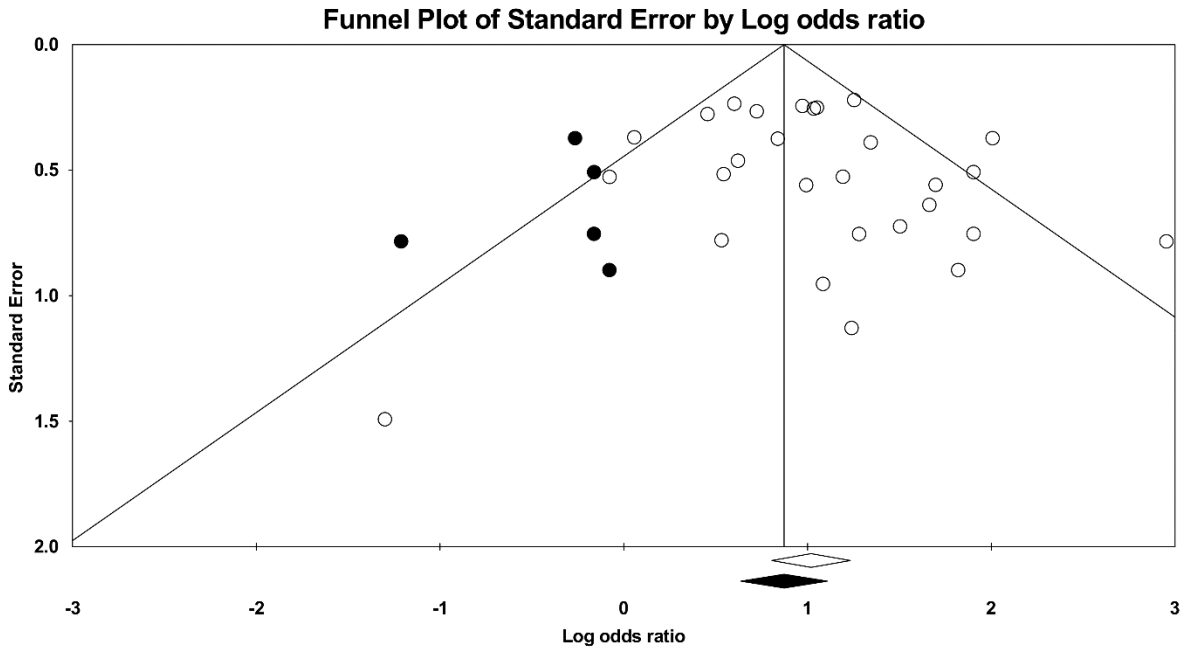

**Duval and Tweedie's trim and fill**

|                        | Fixed Effects   |                |             | Random Effects |                |             | Q Value     |          |
|------------------------|-----------------|----------------|-------------|----------------|----------------|-------------|-------------|----------|
|                        | Studies Trimmed | Point Estimate | Lower Limit | Upper Limit    | Point Estimate | Lower Limit | Upper Limit |          |
| <b>Observed values</b> |                 | 2.65721        | 2.29805     | 3.07251        | 2.77023        | 2.23720     | 3.43025     | 47.22423 |
| <b>Adjusted values</b> | 5               | 2.39935        | 2.08726     | 2.75810        | 2.39216        | 1.89074     | 3.02654     | 72.70471 |

**Classic fail-safe N**

|                                                               |            |
|---------------------------------------------------------------|------------|
| Z-value for observed studies                                  | 12.44152   |
| P-value for observed studies                                  | 0.00000    |
| Alpha                                                         | 0.05000    |
| Tails                                                         | 2.00000    |
| Z for alpha                                                   | 1.95996    |
| Number of observed studies                                    | 28.00000   |
| Number of missing studies that would bring p-value to > alpha | 1101.00000 |

**Egger's regression intercept**

|                            |          |
|----------------------------|----------|
| Intercept                  | 0.59406  |
| Standard error             | 0.56273  |
| 95% lower limit (2-tailed) | -0.56264 |
| 95% upper limit (2-tailed) | 1.75076  |
| t-value                    | 1.05568  |
| df                         | 26.00000 |
| P-value (1-tailed)         | 0.15041  |
| P-value (2-tailed)         | 0.30082  |

**Supplementary Figure S4**  
**Forest plot: After removing one clear outlier**

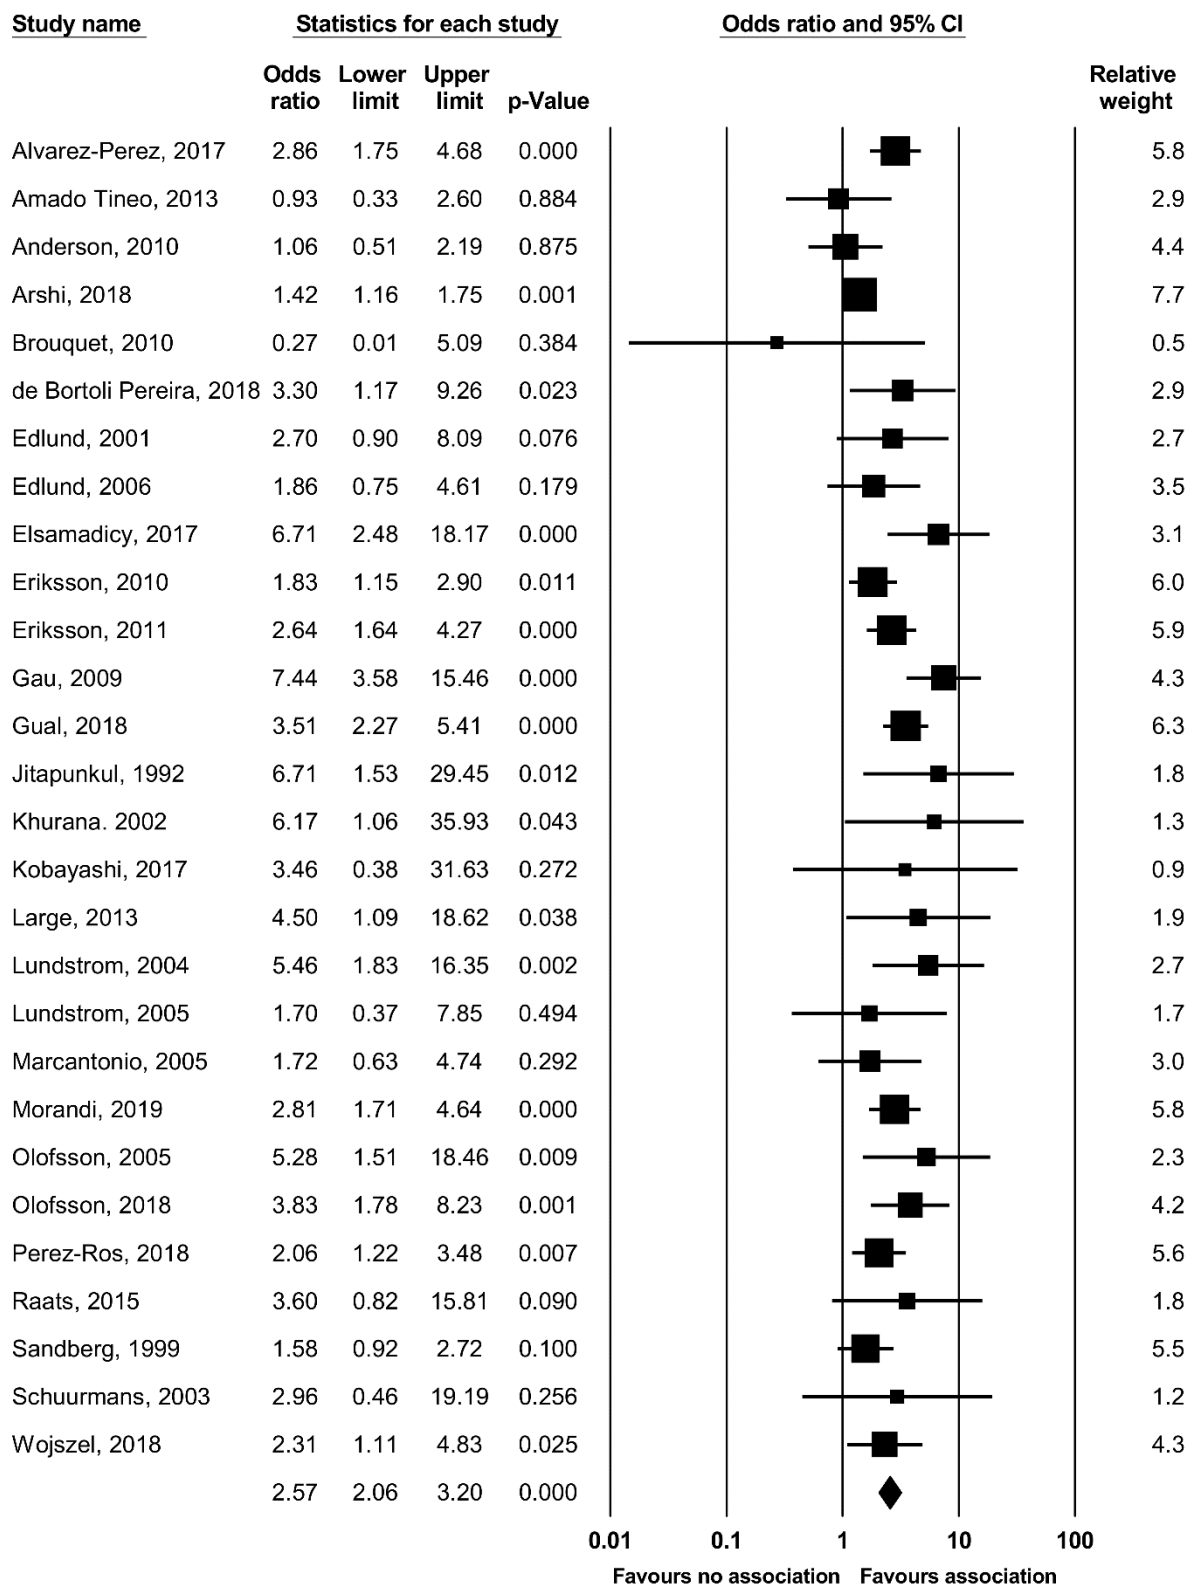

**Supplementary Figure S5**  
**Funnel plot: After removing one clear outlier**

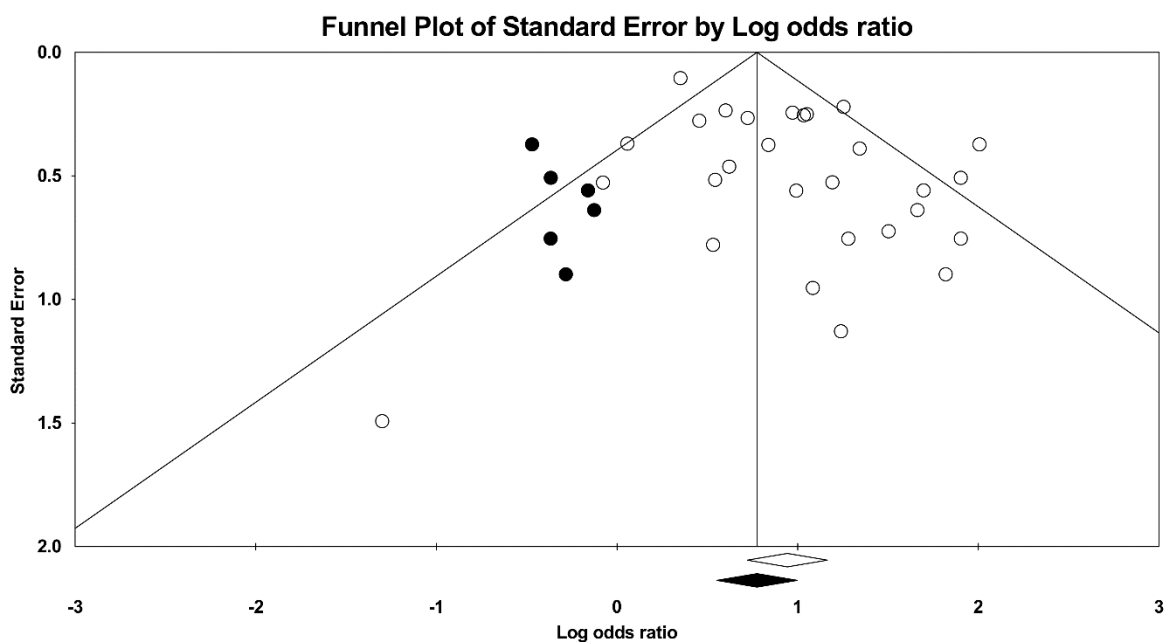

**Duval and Tweedie's trim and fill**

|                        | Fixed Effects   |                |             | Random Effects |                |             | Q Value     |          |
|------------------------|-----------------|----------------|-------------|----------------|----------------|-------------|-------------|----------|
|                        | Studies Trimmed | Point Estimate | Lower Limit | Upper Limit    | Point Estimate | Lower Limit | Upper Limit |          |
| <b>Observed values</b> |                 | 2.13107        | 1.89187     | 2.40052        | 2.56761        | 2.05793     | 3.20351     | 63.07038 |
| <b>Adjusted values</b> | 6               | 1.97911        | 1.76419     | 2.22021        | 2.17064        | 1.73760     | 2.71160     | 85.30111 |

**Classic fail-safe N**

|                                                               |            |
|---------------------------------------------------------------|------------|
| Z-value for observed studies                                  | 12.36207   |
| P-value for observed studies                                  | 0.00000    |
| Alpha                                                         | 0.05000    |
| Tails                                                         | 2.00000    |
| Z for alpha                                                   | 1.95996    |
| Number of observed studies                                    | 28.00000   |
| Number of missing studies that would bring p-value to > alpha | 1086.00000 |

**Egger's regression intercept**

|                            |          |
|----------------------------|----------|
| Intercept                  | 1.22986  |
| Standard error             | 0.46857  |
| 95% lower limit (2-tailed) | 0.26670  |
| 95% upper limit (2-tailed) | 2.19302  |
| t-value                    | 2.62470  |
| df                         | 26.00000 |
| P-value (1-tailed)         | 0.00716  |
| P-value (2-tailed)         | 0.01433  |

### Supplementary Figure S6.

#### Forest plot: Studies comparing participants with delirium to controls without delirium

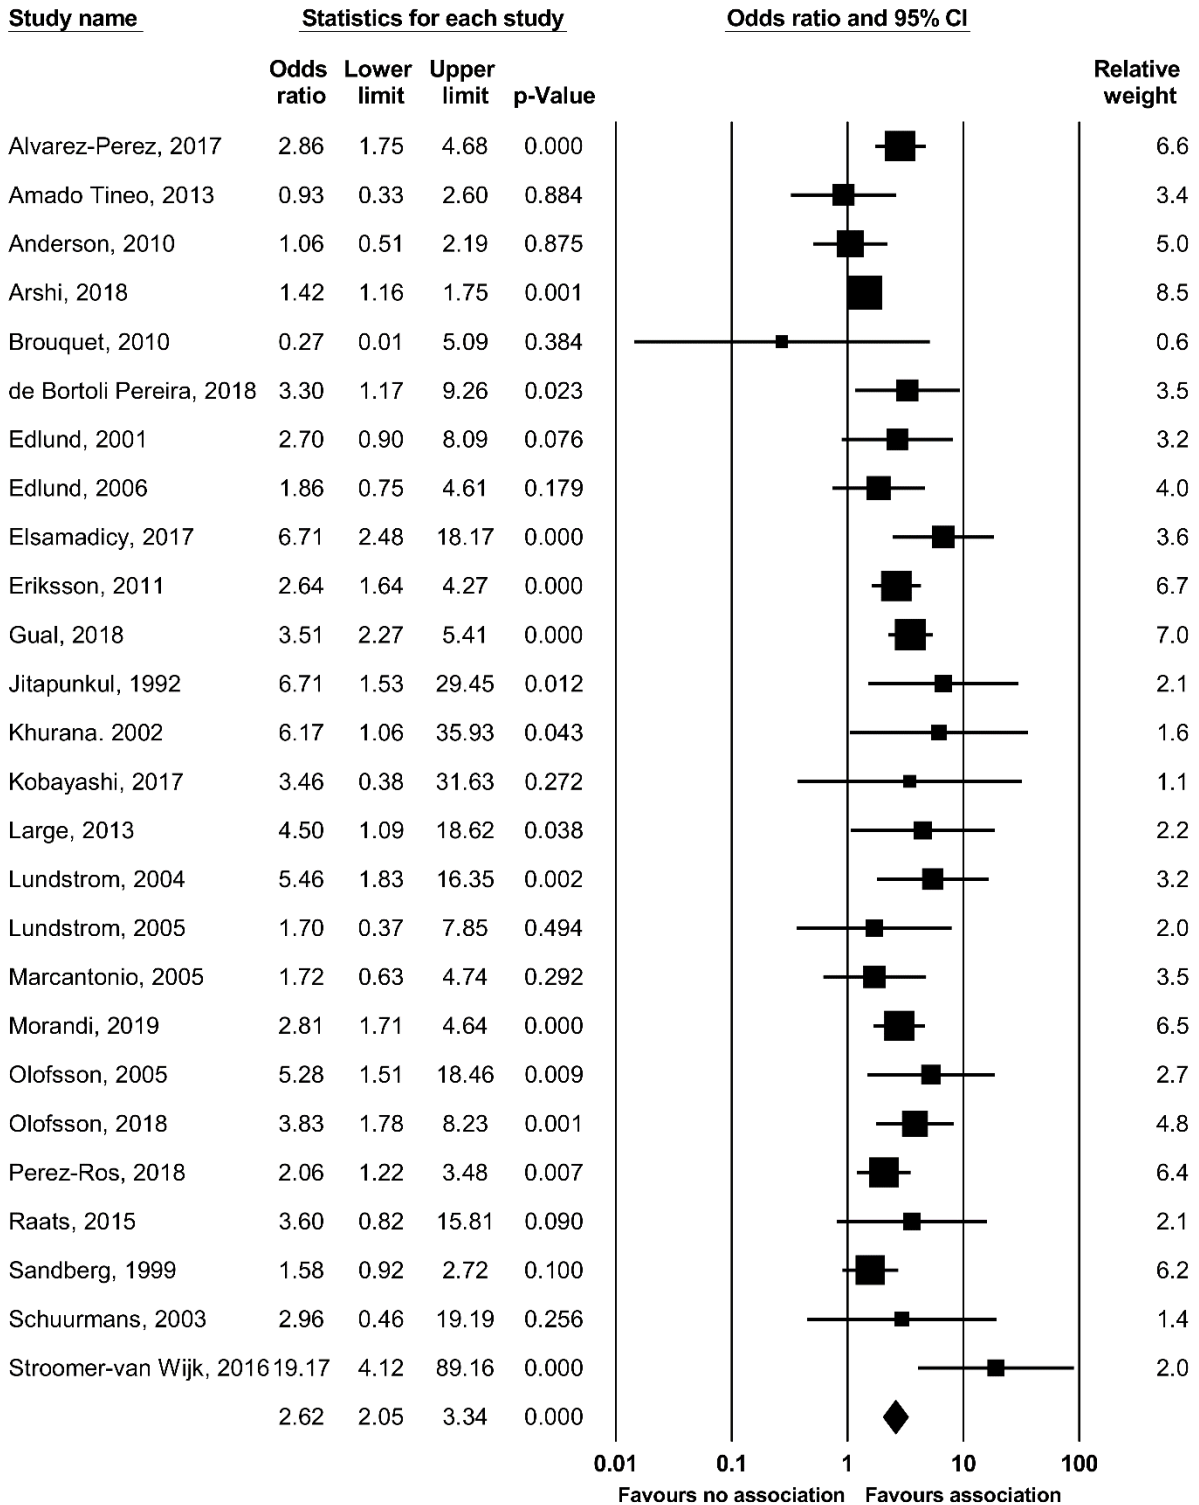



### Supplementary Figure S7

#### Funnel plot: Studies comparing participants with delirium to controls without delirium

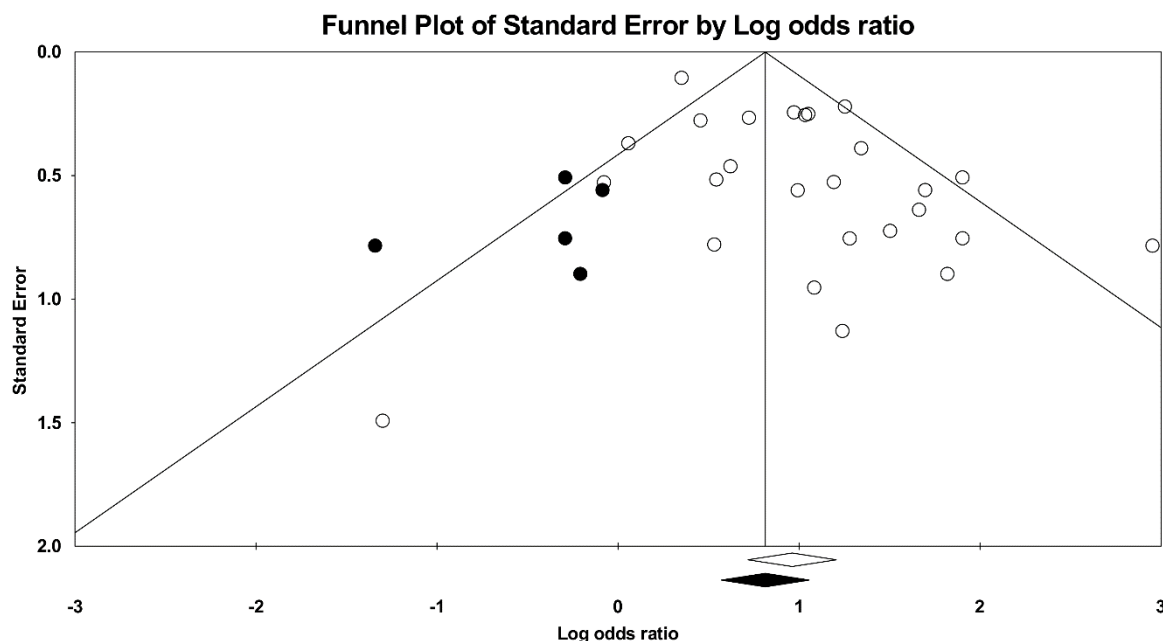

#### Duval and Tweedie's trim and fill

|                        | Fixed Effects   |                |             | Random Effects |                |             | Q Value     |          |
|------------------------|-----------------|----------------|-------------|----------------|----------------|-------------|-------------|----------|
|                        | Studies Trimmed | Point Estimate | Lower Limit | Upper Limit    | Point Estimate | Lower Limit | Upper Limit |          |
| <b>Observed values</b> |                 | 2.10272        | 1.85302     | 2.38606        | 2.61738        | 2.05066     | 3.34071     | 59.15952 |
| <b>Adjusted values</b> | 5               | 1.99672        | 1.76484     | 2.25907        | 2.25624        | 1.76877     | 2.87805     | 74.88697 |

#### Classic fail-safe N

|                                                               |           |
|---------------------------------------------------------------|-----------|
| Z-value for observed studies                                  | 11.57365  |
| P-value for observed studies                                  | 0.00000   |
| Alpha                                                         | 0.05000   |
| Tails                                                         | 2.00000   |
| Z for alpha                                                   | 1.95996   |
| Number of observed studies                                    | 26.00000  |
| Number of missing studies that would bring p-value to > alpha | 881.00000 |

#### Egger's regression intercept

|                            |          |
|----------------------------|----------|
| Intercept                  | 1.27777  |
| Standard error             | 0.45413  |
| 95% lower limit (2-tailed) | 0.34049  |
| 95% upper limit (2-tailed) | 2.21505  |
| t-value                    | 2.81367  |
| df                         | 24.00000 |
| P-value (1-tailed)         | 0.00481  |
| P-value (2-tailed)         | 0.00962  |

**Supplementary Figure S8**  
**Forest plot: Studies comparing participants with UTI to non-UTI controls**

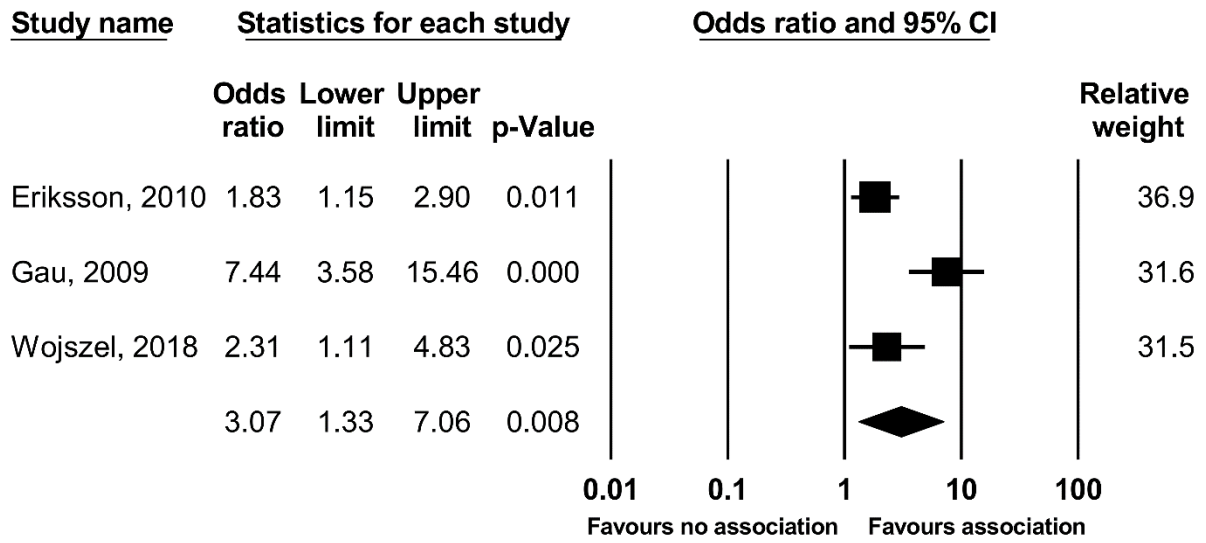

**Supplementary Figure S9**  
**Funnel plot: Studies comparing participants with UTI to non-UTI controls**

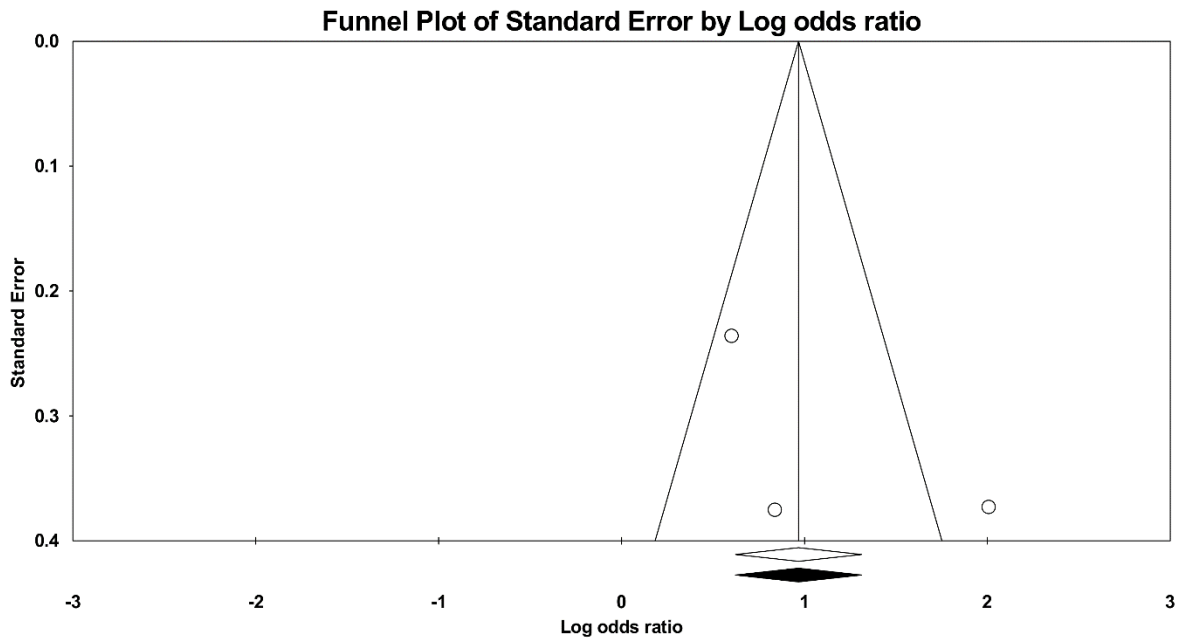

**Duval and Tweedie's trim and fill**

|                        | Fixed Effects   |                |             | Random Effects |                |             | Q Value |             |
|------------------------|-----------------|----------------|-------------|----------------|----------------|-------------|---------|-------------|
|                        | Studies Trimmed | Point Estimate | Lower Limit | Upper Limit    | Point Estimate | Lower Limit |         | Upper Limit |
| <b>Observed values</b> |                 | 2.63093        | 1.86291     | 3.71557        | 3.06538        | 1.33131     | 7.05812 | 10.28549    |
| <b>Adjusted values</b> | 0               | 2.63093        | 1.86291     | 3.71557        | 3.06538        | 1.33131     | 7.05812 | 10.28549    |

**Classic fail-safe N**

|                                                               |          |
|---------------------------------------------------------------|----------|
| Z-value for observed studies                                  | 5.86944  |
| P-value for observed studies                                  | 0.00000  |
| Alpha                                                         | 0.05000  |
| Tails                                                         | 2.00000  |
| Z for alpha                                                   | 1.95996  |
| Number of observed studies                                    | 3.00000  |
| Number of missing studies that would bring p-value to > alpha | 24.00000 |

**Egger's regression intercept**

|                            |           |
|----------------------------|-----------|
| Intercept                  | 5.90696   |
| Standard error             | 5.73169   |
| 95% lower limit (2-tailed) | -66.92108 |
| 95% upper limit (2-tailed) | 78.73499  |
| t-value                    | 1.03058   |
| df                         | 1.00000   |
| P-value (1-tailed)         | 0.24521   |
| P-value (2-tailed)         | 0.49041   |

**Supplementary Figure S10**  
**Forest plot: Studies with a diagnosis of delirium based on DSM or ICD criteria**

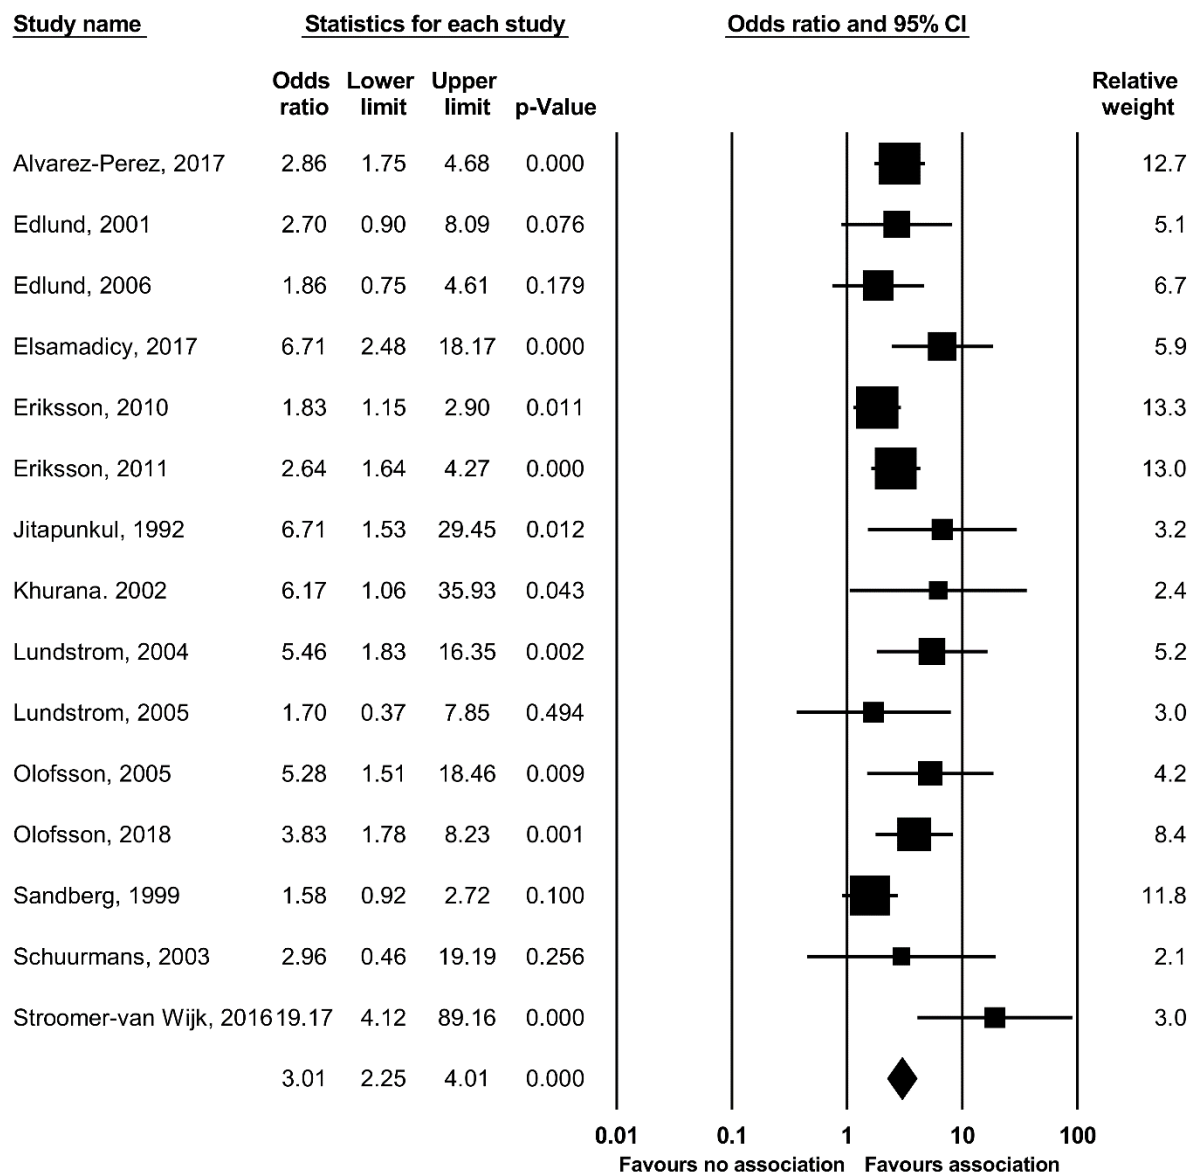

**Supplementary Figure S11**  
**Funnel plot: Studies with a diagnosis of delirium based on DSM or ICD criteria**

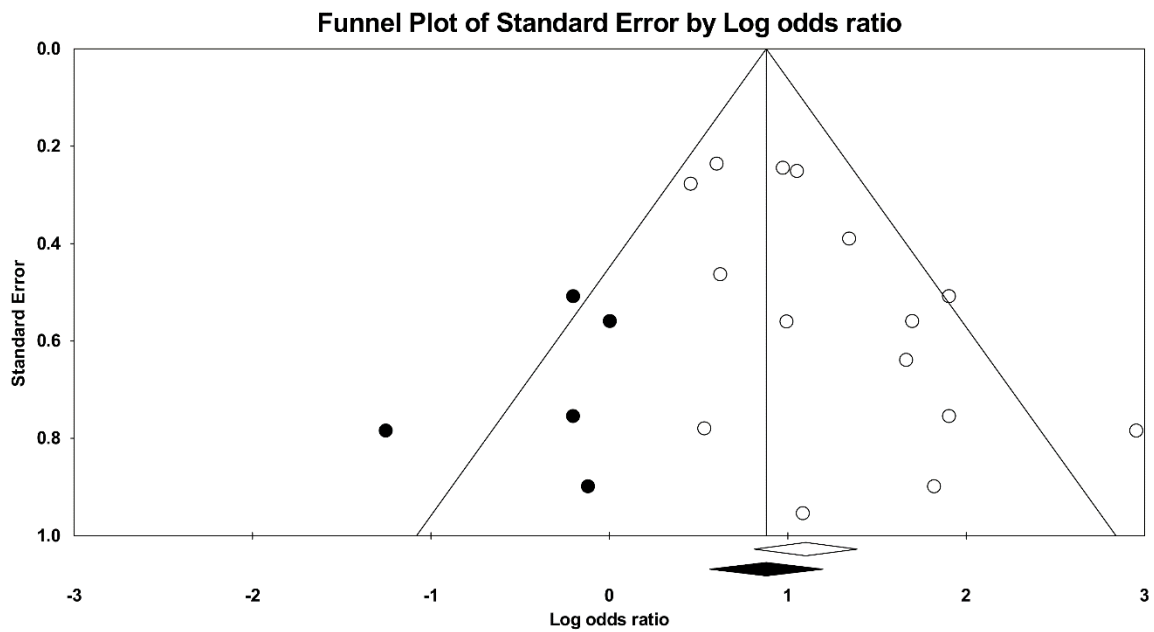

**Duval and Tweedie's trim and fill**

|                        | Fixed Effects   |                |             |             | Random Effects |             |             | Q Value  |
|------------------------|-----------------|----------------|-------------|-------------|----------------|-------------|-------------|----------|
|                        | Studies Trimmed | Point Estimate | Lower Limit | Upper Limit | Point Estimate | Lower Limit | Upper Limit |          |
| <b>Observed values</b> |                 | 2.69212        | 2.20138     | 3.29224     | 3.00594        | 2.25377     | 4.00914     | 22.81648 |
| <b>Adjusted values</b> | 5               | 2.34095        | 1.93610     | 2.83046     | 2.40874        | 1.75270     | 3.31035     | 41.56593 |

**Classic fail-safe N**

|                                                               |           |
|---------------------------------------------------------------|-----------|
| Z-value for observed studies                                  | 9.92688   |
| P-value for observed studies                                  | 0.00000   |
| Alpha                                                         | 0.05000   |
| Tails                                                         | 2.00000   |
| Z for alpha                                                   | 1.95996   |
| Number of observed studies                                    | 15.00000  |
| Number of missing studies that would bring p-value to > alpha | 370.00000 |

**Egger's regression intercept**

|                            |          |
|----------------------------|----------|
| Intercept                  | 1.68165  |
| Standard error             | 0.61223  |
| 95% lower limit (2-tailed) | 0.35901  |
| 95% upper limit (2-tailed) | 3.00429  |
| t-value                    | 2.74677  |
| df                         | 13.00000 |
| P-value (1-tailed)         | 0.00832  |
| P-value (2-tailed)         | 0.01664  |

**Supplementary Figure S12**

**Forest plot: Studies with a diagnosis of UTI based on microbiological urine tests**

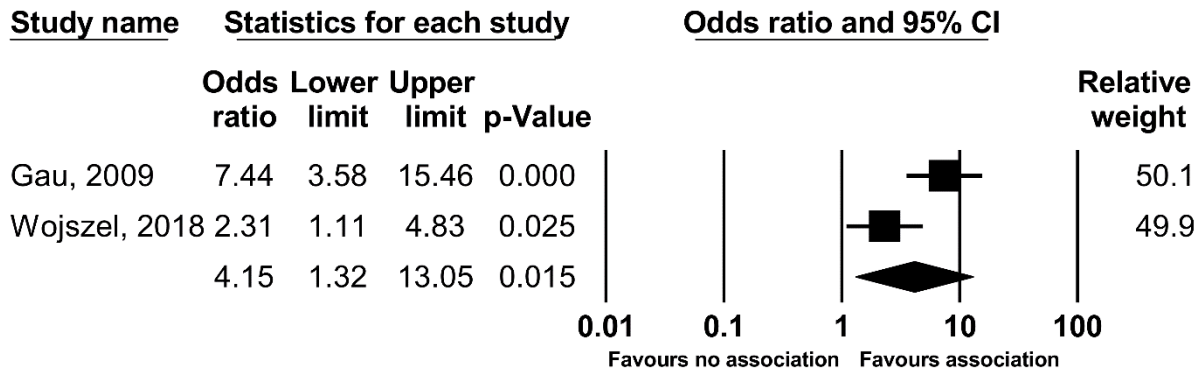

**Supplementary Figure S13**  
**Forest plot: Studies conducted in the clinical setting**

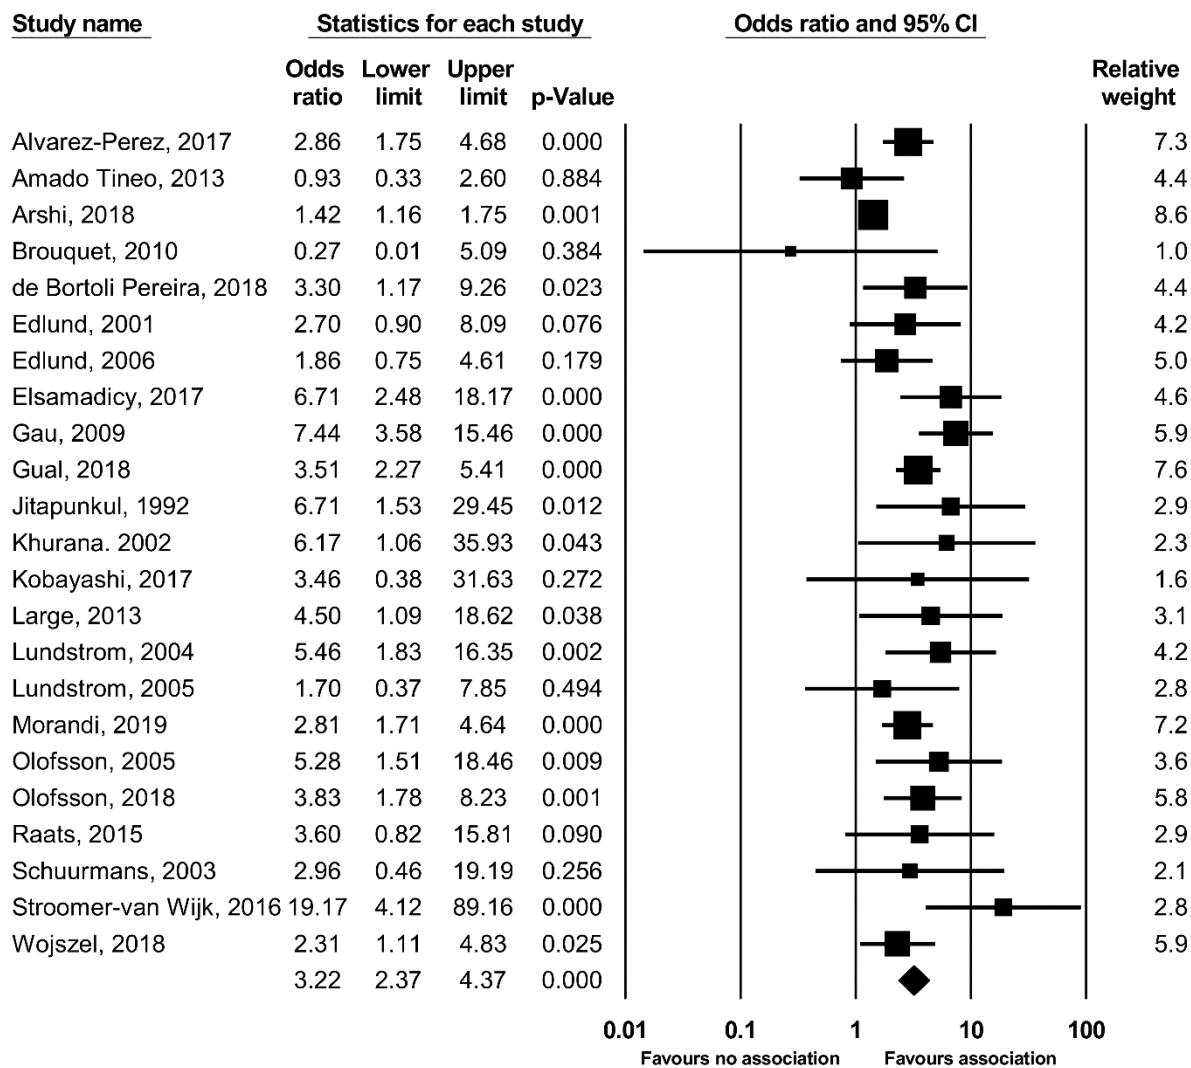

**Supplementary Figure S14**  
**Funnel plot: Studies conducted in the clinical setting**

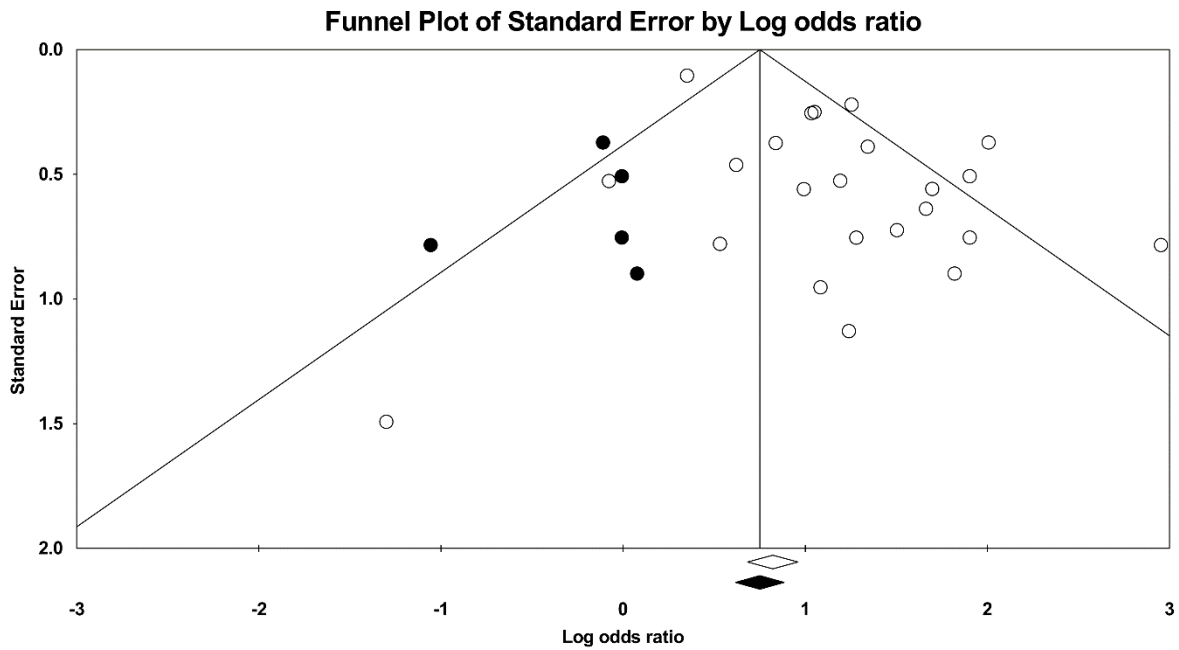

**Duval and Tweedie's trim and fill**

|                        | Fixed Effects   |                |             |             | Random Effects |             |             | Q Value  |
|------------------------|-----------------|----------------|-------------|-------------|----------------|-------------|-------------|----------|
|                        | Studies Trimmed | Point Estimate | Lower Limit | Upper Limit | Point Estimate | Lower Limit | Upper Limit |          |
| <b>Observed values</b> |                 | 2.27437        | 1.97989     | 2.61266     | 3.21657        | 2.36672     | 4.37160     | 63.94317 |
| <b>Adjusted values</b> | 5               | 2.11826        | 1.85349     | 2.42085     | 2.60687        | 1.94926     | 3.48633     | 79.35434 |

**Classic fail-safe N**

|                                                               |           |
|---------------------------------------------------------------|-----------|
| Z-value for observed studies                                  | 11.90156  |
| P-value for observed studies                                  | 0.00000   |
| Alpha                                                         | 0.05000   |
| Tails                                                         | 2.00000   |
| Z for alpha                                                   | 1.95996   |
| Number of observed studies                                    | 23.00000  |
| Number of missing studies that would bring p-value to > alpha | 826.00000 |

**Egger's regression intercept**

|                            |          |
|----------------------------|----------|
| Intercept                  | 1.51258  |
| Standard error             | 0.48564  |
| 95% lower limit (2-tailed) | 0.50264  |
| 95% upper limit (2-tailed) | 2.52252  |
| t-value                    | 3.11462  |
| df                         | 21.00000 |
| P-value (1-tailed)         | 0.00262  |
| P-value (2-tailed)         | 0.00524  |



**Supplementary Figure S15**  
**Forest plot: Studies conducted in nursing homes**

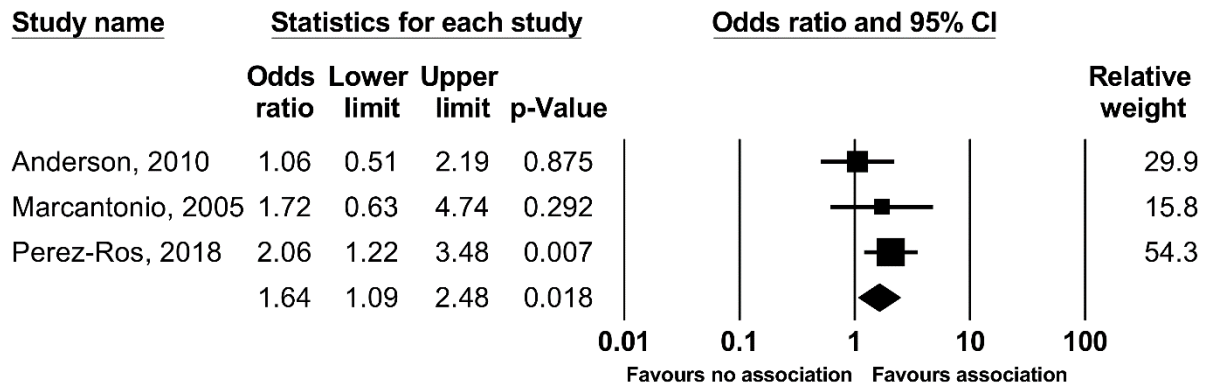

**Supplementary Figure S16**  
**Funnel plot: Studies conducted in nursing homes**

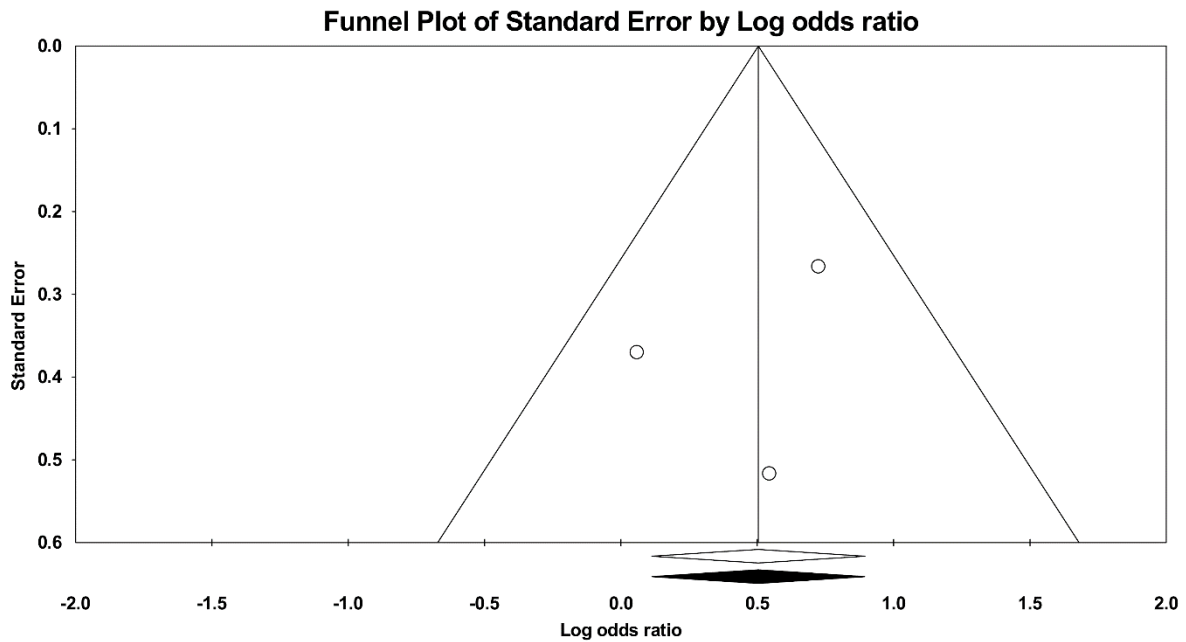

**Duval and Tweedie's trim and fill**

|                        | Fixed Effects   |                |             |             | Random Effects |             |             | Q Value |
|------------------------|-----------------|----------------|-------------|-------------|----------------|-------------|-------------|---------|
|                        | Studies Trimmed | Point Estimate | Lower Limit | Upper Limit | Point Estimate | Lower Limit | Upper Limit |         |
| <b>Observed values</b> |                 | 1.65498        | 1.11967     | 2.44622     | 1.64318        | 1.09044     | 2.47610     | 2.14131 |
| <b>Adjusted values</b> | 0               | 1.65498        | 1.11967     | 2.44622     | 1.64318        | 1.09044     | 2.47610     | 2.14131 |

**Classic fail-safe N**

|                                                               |         |
|---------------------------------------------------------------|---------|
| Z-value for observed studies                                  | 2.26847 |
| P-value for observed studies                                  | 0.02330 |
| Alpha                                                         | 0.05000 |
| Tails                                                         | 2.00000 |
| Z for alpha                                                   | 1.95996 |
| Number of observed studies                                    | 3.00000 |
| Number of missing studies that would bring p-value to > alpha | 2.00000 |

**Egger's regression intercept**

|                            |           |
|----------------------------|-----------|
| Intercept                  | -1.50667  |
| Standard error             | 2.91270   |
| 95% lower limit (2-tailed) | -38.51609 |
| 95% upper limit (2-tailed) | 35.50275  |
| t-value                    | 0.51728   |
| df                         | 1.00000   |
| P-value (1-tailed)         | 0.34805   |
| P-value (2-tailed)         | 0.69610   |

**Supplementary Figure S17**  
**Forest plot: Studies of population-based samples**

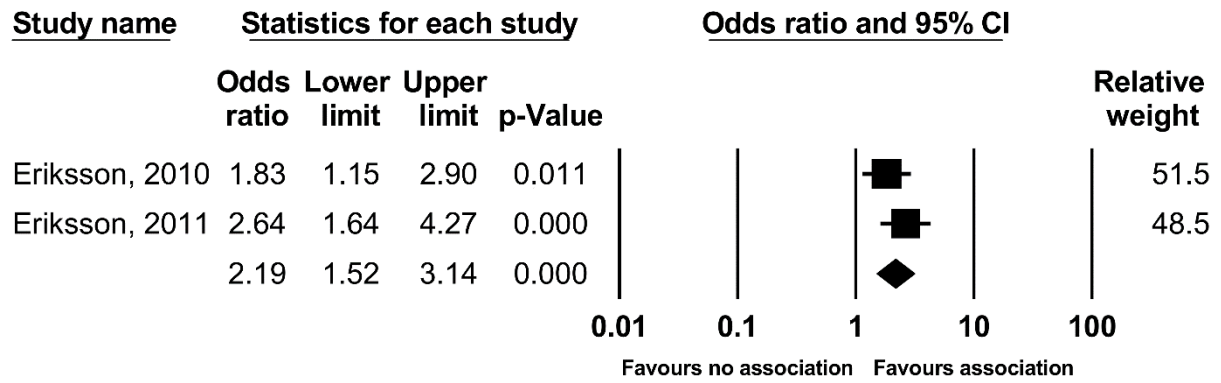

Supplement: JGS-69-3312-s001.pdf [file JGS-69-3312-s001.pdf]
